# Supplementary material for: Assessment of density functional methods for exciton binding energies and related optoelectronic properties
Source: Royal Society of Chemistry journal article supplement (doi:10.1039/c5ra20085g), 2015-01-01
Supplement: c5ra20085g1.pdf [file c5ra20085g1.pdf]

# Supplementary Material to: Assessment of Density Functional Methods for Exciton Binding Energies and Related Optoelectronic Properties

Jui-Che Lee,<sup>†</sup> Jeng-Da Chai<sup>\*‡</sup> and Shiang-Tai Lin<sup>\*†</sup>

<sup>†</sup>Department of Chemical Engineering, National Taiwan University, Taipei 10617, Taiwan.  
E-mail: stlin@ntu.edu.tw

<sup>‡</sup>Department of Physics, Center for Theoretical Sciences, and Center for Quantum Science and  
Engineering, National Taiwan University, Taipei 10617, Taiwan.  
E-mail: jdchai@phys.ntu.edu.tw

Table S1. Vertical ionization potentials (1) of the 121 molecules studied (pp. 3-6).

Table S2. Vertical ionization potentials (2) of the 121 molecules studied (pp. 7-10).

Table S3. Vertical electron affinities (1) of the 121 molecules studied (pp. 11-13).

Table S4. Vertical electron affinities (2) of the 121 molecules studied (pp. 14-17).

Table S5. Vertical electron affinities (3) of the 121 molecules studied (pp. 18-21).

Table S6. Fundamental gaps (1) of the 121 molecules studied (pp. 23-26).

Table S7. Fundamental gaps (2) of the 121 molecules studied (pp. 27-30).

Table S8. Fundamental gaps (3) of the 121 molecules studied (pp. 31-34).

Table S9. Optical gaps of the 121 molecules studied (pp. 35-38).

Table S10. Exciton binding energies (1) of the 121 molecules studied (pp. 39-42).

Table S11. Exciton binding energies (2) of the 121 molecules studied (pp. 43-46).

Table S12. Exciton binding energies (3) of the 121 molecules studied (pp. 47-50).

Table S13. Statistical errors (in eV) of CCSD and CCSD(T) methods for IP(1) (pp. 51).

Table S14. Statistical errors (in eV) of CCSD for IP(1), EA(1), and Eg(1) (pp. 51).

Table S15. Statistical errors (in eV) of 9 density functional methods for vertical ionization potentials (pp. 51).

Figure S1. IP(1) calculated using CCSD and CCSD(T) methods with respect to the experimental data. (pp. 52).

Figure S2. IP(1), EA(1), and Eg(1) calculated using CCSD with respect to those calculated using CCSD(T). (pp. 53).

References (pp. 54).

Table S1. Vertical ionization potentials (1) [in eV] of the 121 molecules studied. Most experimental reference values are collected from the NIST database,<sup>1</sup> while other publications<sup>2-13</sup> are adopted for the molecules marked.

| Molecule                                   | Expt. | CCSD  | LDA   | PBE   | M06L  | B3LYP | $\omega$ B97 | $\omega$ B97X | $\omega$ B97X-D | M06-2X | M06-HF |
|--------------------------------------------|-------|-------|-------|-------|-------|-------|--------------|---------------|-----------------|--------|--------|
| Al (Aluminum atom)                         | 5.99  | 5.93  | 6.46  | 6.08  | 5.89  | 6.02  | 5.89         | 5.95          | 6.00            | 5.79   | 5.84   |
| AlCl3 (Aluminum trichloride)               | 12.01 | 12.25 | 11.55 | 10.88 | 11.13 | 11.32 | 12.20        | 12.02         | 11.76           | 11.89  | 12.41  |
| Ar (Argon atom)                            | 15.76 | 15.68 | 16.51 | 15.71 | 15.79 | 15.79 | 15.73        | 15.75         | 15.78           | 15.78  | 15.73  |
| B (Boron atom)                             | 8.30  | 8.19  | 9.09  | 8.67  | 8.61  | 8.74  | 8.40         | 8.51          | 8.56            | 8.31   | 8.10   |
| BCl3 (Borane, trichloro-)                  | 11.64 | 11.98 | 11.47 | 10.80 | 11.07 | 11.22 | 11.95        | 11.79         | 11.56           | 11.72  | 12.20  |
| Be (Beryllium atom) <sup>11</sup>          | 9.32  | 9.29  | 9.46  | 9.00  | 8.93  | 9.11  | 8.92         | 8.87          | 8.84            | 9.06   | 9.08   |
| BF3 (Borane, trifluoro-)                   | 15.96 | 16.34 | 15.28 | 14.44 | 14.51 | 15.22 | 15.57        | 15.52         | 15.38           | 16.04  | 17.28  |
| C (Carbon atom)                            | 11.26 | 11.18 | 12.14 | 11.54 | 11.39 | 11.54 | 11.29        | 11.39         | 11.44           | 11.31  | 11.18  |
| C2F4 (Tetrafluoroethylene)                 | 10.69 | 10.76 | 10.92 | 10.08 | 10.00 | 10.48 | 10.36        | 10.41         | 10.41           | 10.73  | 11.29  |
| C2H2 (Acetylene)                           | 11.49 | 11.33 | 12.25 | 11.41 | 11.17 | 11.35 | 11.20        | 11.24         | 11.27           | 11.36  | 11.62  |
| C2H2O2 (Ethanediol)                        | 10.60 | 10.86 | 10.68 | 9.99  | 10.02 | 10.47 | 10.74        | 10.70         | 10.58           | 10.82  | 11.48  |
| C2H4 (Ethylene)                            | 10.68 | 10.50 | 11.45 | 10.62 | 10.38 | 10.53 | 10.37        | 10.41         | 10.43           | 10.46  | 10.55  |
| C2H4O (Ethylene oxide)                     | 10.57 | 10.68 | 11.20 | 10.47 | 10.40 | 10.60 | 10.63        | 10.61         | 10.58           | 10.77  | 11.04  |
| C2H4S (Thiirane)                           | 9.05  | 9.02  | 9.64  | 8.92  | 8.94  | 9.00  | 8.98         | 9.00          | 9.01            | 9.10   | 9.27   |
| C2H5N (Aziridine)                          | 9.85  | 9.79  | 10.33 | 9.63  | 9.61  | 9.73  | 9.75         | 9.73          | 9.71            | 9.90   | 10.13  |
| C2H6 (Ethane)                              | 11.99 | 12.83 | 12.42 | 11.91 | 12.11 | 12.28 | 12.53        | 12.46         | 12.36           | 12.54  | 12.90  |
| C2HF3 (Trifluoroethylene) <sup>5</sup>     | 10.62 | 10.50 | 10.82 | 10.00 | 9.93  | 10.28 | 10.16        | 10.21         | 10.21           | 10.46  | 10.88  |
| C2N2 (Cyanogen)                            | 13.51 | 13.59 | 13.98 | 13.14 | 13.03 | 13.25 | 13.39        | 13.37         | 13.32           | 13.57  | 14.01  |
| C3H4 (Cyclopropene)                        | 9.86  | 9.90  | 10.41 | 9.72  | 9.63  | 9.76  | 9.72         | 9.73          | 9.72            | 9.89   | 10.19  |
| C3H6 (Cyclopropane)                        | 10.54 | 10.90 | 11.50 | 10.75 | 10.76 | 10.82 | 10.83        | 10.82         | 10.80           | 10.96  | 11.06  |
| C3H8 (Propane)                             | 11.51 | 12.23 | 11.59 | 11.09 | 11.32 | 11.55 | 11.91        | 11.82         | 11.67           | 11.87  | 12.36  |
| C3O2 (Carbon suboxide) <sup>10</sup>       | 10.80 | 10.69 | 11.60 | 10.76 | 10.60 | 10.86 | 10.69        | 10.74         | 10.79           | 11.00  | 11.42  |
| C4H2 (Diacetylene)                         | 10.30 | 10.23 | 10.70 | 9.92  | 9.86  | 9.98  | 10.02        | 10.02         | 10.00           | 10.21  | 10.57  |
| C4H4O (Furan)                              | 8.90  | 8.93  | 9.70  | 8.90  | 8.76  | 8.89  | 8.84         | 8.85          | 8.85            | 9.02   | 9.30   |
| C4H6 (Cyclobutene)                         | 9.43  | 9.56  | 10.14 | 9.41  | 9.27  | 9.43  | 9.36         | 9.37          | 9.38            | 9.51   | 9.73   |
| C4N2 (2-Butynedinitrile) <sup>4</sup>      | 11.84 | 12.11 | 12.31 | 11.51 | 11.45 | 11.67 | 11.89        | 11.86         | 11.79           | 12.05  | 12.56  |
| CCl4 (Carbon tetrachloride)                | 11.69 | 11.91 | 11.19 | 10.54 | 10.83 | 11.03 | 11.87        | 11.68         | 11.41           | 11.62  | 12.20  |
| CF2Cl2 (Difluorodichloromethane)           | 12.24 | 12.43 | 12.20 | 11.49 | 11.72 | 11.89 | 12.37        | 12.27         | 12.12           | 12.29  | 12.65  |
| CF2O (Carbonic difluoride)                 | 13.60 | 13.58 | 14.05 | 13.16 | 13.07 | 13.47 | 13.45        | 13.44         | 13.43           | 13.70  | 14.10  |
| CF3Br (Bromotrifluoromethane) <sup>8</sup> | 12.08 | 12.04 | 12.45 | 11.64 | 11.50 | 11.93 | 11.86        | 11.89         | 11.89           | 11.95  | 12.45  |
| CF3Cl (Methane, chlorotrifluoro-)          | 13.08 | 13.10 | 13.32 | 12.55 | 12.69 | 12.93 | 13.00        | 13.01         | 12.99           | 13.15  | 13.38  |
| CF4 (Carbon tetrafluoride)                 | 16.20 | 16.77 | 15.36 | 14.54 | 14.72 | 15.47 | 15.82        | 15.79         | 15.65           | 16.44  | 17.84  |

## CFCI3

|                                                                      |       |       |       |       |       |       |       |       |       |       |       |
|----------------------------------------------------------------------|-------|-------|-------|-------|-------|-------|-------|-------|-------|-------|-------|
| (Trichloromonofluoromethane)                                         | 11.76 | 12.02 | 11.50 | 10.83 | 11.10 | 11.27 | 11.98 | 11.82 | 11.59 | 11.78 | 12.26 |
| CH <sub>2</sub> CCH <sub>2</sub> (Allene)                            | 10.20 | 10.15 | 10.84 | 10.08 | 9.90  | 10.10 | 10.03 | 10.05 | 10.06 | 10.16 | 10.41 |
| CH <sub>2</sub> CCl <sub>2</sub> (Ethene, 1,1-dichloro-)             | 10.00 | 10.00 | 10.29 | 9.56  | 9.55  | 9.72  | 9.88  | 9.84  | 9.78  | 9.91  | 10.22 |
| CH <sub>2</sub> CF <sub>2</sub> (Ethene, 1,1-difluoro-) <sup>5</sup> | 10.70 | 10.67 | 11.20 | 10.37 | 10.24 | 10.55 | 10.42 | 10.46 | 10.47 | 10.67 | 11.02 |
| CH <sub>2</sub> CHCHO (Acrolein) <sup>13</sup>                       | 10.10 | 10.11 | 10.55 | 9.80  | 9.72  | 9.96  | 10.01 | 9.99  | 9.95  | 10.15 | 10.48 |
| CH <sub>2</sub> CHCl (Ethene, chloro-)                               | 10.20 | 10.11 | 10.57 | 9.83  | 9.81  | 9.92  | 9.99  | 9.97  | 9.94  | 10.05 | 10.27 |
| CH <sub>2</sub> CHF (Ethene, fluoro-)                                | 10.63 | 10.52 | 11.18 | 10.36 | 10.24 | 10.44 | 10.31 | 10.35 | 10.36 | 10.49 | 10.71 |
| CH <sub>2</sub> Cl <sub>2</sub> (Methylene chloride)                 | 11.40 | 11.66 | 11.31 | 10.69 | 10.89 | 11.23 | 11.65 | 11.57 | 11.44 | 11.55 | 11.82 |
| CH <sub>2</sub> CO (Ketene)                                          | 9.64  | 9.68  | 10.53 | 9.72  | 9.55  | 9.80  | 9.69  | 9.72  | 9.74  | 9.87  | 10.20 |
| CH <sub>2</sub> F <sub>2</sub> (Methane, difluoro-)                  | 13.27 | 13.69 | 13.07 | 12.42 | 12.53 | 13.01 | 13.13 | 13.12 | 13.05 | 13.43 | 14.19 |
| CH <sub>3</sub> (Methyl radical)                                     | 9.84  | 9.71  | 10.55 | 10.02 | 9.85  | 9.92  | 9.72  | 9.76  | 9.77  | 9.76  | 9.69  |
| CH <sub>3</sub> CCCH <sub>3</sub> (2-Butyne)                         | 9.79  | 9.64  | 9.99  | 9.30  | 9.23  | 9.41  | 9.42  | 9.43  | 9.41  | 9.60  | 9.93  |
| CH <sub>3</sub> CCH (Propyne)                                        | 10.37 | 10.39 | 10.95 | 10.21 | 10.08 | 10.26 | 10.21 | 10.23 | 10.23 | 10.38 | 10.69 |
| CH <sub>3</sub> CH <sub>2</sub> Cl (Ethyl chloride)                  | 11.06 | 11.12 | 11.70 | 10.66 | 10.81 | 10.94 | 11.07 | 11.06 | 11.02 | 11.13 | 11.28 |
| CH <sub>3</sub> CH <sub>2</sub> OH (Ethanol)                         | 10.64 | 10.75 | 10.82 | 10.19 | 10.21 | 10.52 | 10.63 | 10.60 | 10.53 | 10.75 | 11.13 |
| CH <sub>3</sub> Cl (Methyl chloride)                                 | 11.29 | 11.38 | 11.75 | 11.09 | 11.21 | 11.27 | 11.34 | 11.33 | 11.32 | 11.40 | 11.54 |
| CH <sub>3</sub> COCl (Acetyl Chloride)                               | 11.03 | 11.23 | 11.47 | 10.74 | 10.77 | 10.95 | 11.07 | 11.04 | 10.99 | 11.14 | 12.08 |
| CH <sub>3</sub> F (Methyl fluoride)                                  | 13.04 | 13.46 | 13.36 | 12.71 | 12.78 | 13.08 | 13.15 | 13.13 | 13.08 | 13.32 | 13.80 |
| CH <sub>3</sub> NHCH <sub>3</sub> (Dimethylamine)                    | 8.95  | 8.99  | 9.44  | 8.77  | 8.75  | 8.92  | 8.96  | 8.94  | 8.90  | 9.08  | 9.31  |
| CH <sub>3</sub> NO <sub>2</sub> (Methane, nitro-)                    | 11.29 | 11.41 | 11.76 | 11.00 | 11.01 | 11.45 | 11.69 | 11.64 | 11.53 | 11.90 | 12.65 |
| CH <sub>3</sub> OCH <sub>3</sub> (Dimethyl ether)                    | 10.10 | 10.11 | 10.39 | 9.73  | 9.72  | 9.94  | 10.01 | 9.98  | 9.94  | 10.14 | 10.44 |
| CH <sub>3</sub> OH (Methyl alcohol)                                  | 10.96 | 11.02 | 11.38 | 10.68 | 10.63 | 10.89 | 10.93 | 10.91 | 10.87 | 11.06 | 11.41 |
| CH <sub>3</sub> SH (Methanethiol)                                    | 9.44  | 9.39  | 9.95  | 9.26  | 9.28  | 9.36  | 9.35  | 9.38  | 9.38  | 9.44  | 9.54  |
| CH <sub>3</sub> SiH <sub>3</sub> (Methyl silane)                     | 11.60 | 11.73 | 11.80 | 11.25 | 11.45 | 11.57 | 12.17 | 12.11 | 12.00 | 11.70 | 12.28 |
| CH <sub>4</sub> (Methane)                                            | 13.60 | 14.38 | 14.58 | 13.96 | 14.05 | 14.18 | 14.18 | 14.18 | 14.16 | 14.29 | 14.58 |
| CHCl <sub>3</sub> (Chloroform)                                       | 11.50 | 11.63 | 11.18 | 10.52 | 10.78 | 10.92 | 11.61 | 11.45 | 11.23 | 11.41 | 11.83 |
| CHF <sub>3</sub> (Methane, trifluoro-)                               | 15.50 | 14.97 | 14.25 | 13.52 | 13.60 | 14.19 | 14.36 | 14.34 | 15.18 | 14.69 | 15.54 |
| CHONH <sub>2</sub> (Formamide) <sup>3</sup>                          | 10.40 | 10.31 | 11.01 | 10.22 | 10.04 | 10.31 | 10.27 | 10.25 | 10.24 | 10.41 | 10.72 |
| Cl (Chlorine atom)                                                   | 12.97 | 12.84 | 13.40 | 12.97 | 12.88 | 13.07 | 12.96 | 13.01 | 13.04 | 13.00 | 13.09 |
| Cl <sub>2</sub> (Chlorine diatomic)                                  | 11.49 | 11.64 | 11.87 | 11.18 | 11.35 | 11.42 | 11.66 | 11.60 | 11.54 | 11.64 | 11.82 |
| ClF (Chlorine monofluoride)                                          | 12.77 | 12.81 | 13.16 | 12.41 | 12.51 | 12.71 | 12.72 | 12.74 | 12.74 | 12.93 | 13.20 |
| ClF <sub>3</sub> (Chlorine trifluoride)                              | 13.05 | 13.24 | 12.74 | 11.98 | 12.11 | 12.66 | 12.88 | 12.87 | 12.77 | 13.23 | 14.07 |
| ClO (Monochlorine monoxide)                                          | 11.01 | 11.03 | 11.19 | 10.75 | 10.72 | 11.04 | 11.06 | 11.06 | 11.04 | 11.13 | 11.46 |
| CO (Carbon monoxide)                                                 | 14.01 | 14.01 | 14.60 | 13.86 | 13.66 | 14.19 | 14.18 | 14.14 | 14.11 | 14.13 | 14.57 |
| CO <sub>2</sub> (Carbon dioxide)                                     | 13.78 | 13.77 | 14.55 | 13.67 | 13.52 | 13.81 | 13.84 | 13.82 | 13.80 | 14.03 | 14.44 |
| CS (Carbon monosulfide) <sup>9</sup>                                 | 11.34 | 11.35 | 11.99 | 11.29 | 11.10 | 11.49 | 11.53 | 11.49 | 11.48 | 11.43 | 11.77 |
| CS <sub>2</sub> (Carbon disulfide)                                   | 10.09 | 9.97  | 10.74 | 10.03 | 10.05 | 10.06 | 10.00 | 10.03 | 10.08 | 10.15 | 10.31 |

|                                         |       |       |       |       |       |       |       |       |       |       |       |
|-----------------------------------------|-------|-------|-------|-------|-------|-------|-------|-------|-------|-------|-------|
| F (Fluorine atom)                       | 17.42 | 17.28 | 18.52 | 17.66 | 17.21 | 17.73 | 17.46 | 17.45 | 17.47 | 17.50 | 17.54 |
| F2 (Fluorine diatomic)                  | 15.70 | 16.08 | 16.18 | 15.35 | 15.42 | 15.92 | 15.81 | 15.87 | 15.88 | 16.28 | 16.83 |
| F2O (Difluorine monoxide)               | 13.26 | 13.55 | 13.48 | 12.69 | 12.76 | 13.37 | 13.32 | 13.36 | 13.34 | 13.75 | 14.45 |
| FCN (Cyanogen fluoride) <sup>3</sup>    | 13.65 | 13.52 | 14.19 | 13.31 | 13.16 | 13.43 | 13.30 | 13.34 | 13.36 | 13.59 | 13.94 |
| H (Hydrogen atom)                       | 13.60 | 13.60 | 13.51 | 13.60 | 13.71 | 13.67 | 13.65 | 13.65 | 13.68 | 13.57 | 13.53 |
| H2CO (Formaldehyde)                     | 10.89 | 10.88 | 11.45 | 10.75 | 10.69 | 10.89 | 10.83 | 10.84 | 10.83 | 10.99 | 11.28 |
| H2CS (Thioformaldehyde)                 | 9.38  | 9.32  | 9.95  | 9.25  | 9.22  | 9.32  | 9.25  | 9.29  | 9.32  | 9.40  | 9.64  |
| H2O (Water) <sup>6</sup>                | 12.62 | 12.63 | 13.70 | 12.80 | 12.44 | 12.81 | 12.71 | 12.69 | 12.68 | 12.78 | 13.03 |
| H2O2 (Hydrogen peroxide)                | 11.70 | 11.79 | 12.04 | 11.29 | 11.29 | 11.67 | 11.68 | 11.68 | 11.64 | 11.92 | 12.37 |
| H2S (Hydrogen sulfide)                  | 10.50 | 10.38 | 11.15 | 10.41 | 10.39 | 10.46 | 10.40 | 10.43 | 10.46 | 10.47 | 10.50 |
| HCCCN (Cyanoacetylene) <sup>2</sup>     | 11.75 | 11.70 | 12.17 | 11.37 | 11.27 | 11.44 | 11.50 | 11.50 | 11.47 | 11.69 | 12.08 |
| HCCF (Fluoroacetylene) <sup>5</sup>     | 11.50 | 11.34 | 12.00 | 11.16 | 11.03 | 11.26 | 11.13 | 11.17 | 11.19 | 11.39 | 11.73 |
| HCl (Hydrogen chloride) <sup>12</sup>   | 12.77 | 12.69 | 13.50 | 12.73 | 12.73 | 12.78 | 12.72 | 12.75 | 12.78 | 12.79 | 12.85 |
| HCN (Hydrogen cyanide)                  | 13.61 | 13.62 | 14.64 | 13.75 | 13.46 | 13.68 | 13.51 | 13.55 | 13.58 | 13.66 | 13.90 |
| HCO (Formyl radical)                    | 9.31  | 9.68  | 10.27 | 9.77  | 9.74  | 10.06 | 9.90  | 9.95  | 9.96  | 9.96  | 10.23 |
| HCOOH (Formic acid)                     | 11.50 | 11.26 | 11.93 | 11.10 | 10.92 | 11.24 | 11.21 | 11.19 | 11.17 | 11.37 | 11.74 |
| He (Helium atom)                        | 24.59 | 24.56 | 24.78 | 24.47 | 24.69 | 24.94 | 24.66 | 24.66 | 24.72 | 24.72 | 24.76 |
| HF (Hydrogen fluoride)                  | 16.12 | 16.12 | 17.30 | 16.32 | 15.88 | 16.33 | 16.21 | 16.16 | 16.16 | 16.21 | 16.41 |
| Li (Lithium atom)                       | 5.39  | 5.34  | 5.88  | 5.58  | 5.10  | 5.63  | 5.33  | 5.30  | 5.37  | 5.41  | 5.83  |
| Mg (Magnesium atom)                     | 7.65  | 7.53  | 8.15  | 7.61  | 7.53  | 7.73  | 7.64  | 7.59  | 7.47  | 7.77  | 7.74  |
| N (Nitrogen atom)                       | 14.53 | 14.47 | 15.46 | 14.73 | 14.68 | 14.66 | 14.52 | 14.57 | 14.61 | 14.53 | 14.33 |
| N2 (Nitrogen diatomic)                  | 15.58 | 15.71 | 16.14 | 15.39 | 15.32 | 15.83 | 15.89 | 15.90 | 15.87 | 16.07 | 16.84 |
| N2H4 (Hydrazine)                        | 8.98  | 9.84  | 10.03 | 9.39  | 9.45  | 9.64  | 9.71  | 9.69  | 9.64  | 9.85  | 10.18 |
| N2O (Nitrous oxide)                     | 12.89 | 12.77 | 13.79 | 12.90 | 12.71 | 12.93 | 12.77 | 12.79 | 12.83 | 12.98 | 13.15 |
| Na (Sodium atom)                        | 5.14  | 4.68  | 5.78  | 5.36  | 4.49  | 5.43  | 4.88  | 4.88  | 4.97  | 5.16  | 5.62  |
| NaCl (Sodium Chloride)                  | 9.80  | 9.12  | 10.10 | 9.32  | 9.20  | 9.33  | 9.19  | 9.22  | 9.25  | 9.29  | 9.39  |
| Ne (Neon atom)                          | 21.57 | 21.46 | 22.74 | 21.66 | 21.18 | 21.71 | 21.53 | 21.47 | 21.49 | 21.50 | 21.67 |
| NF3 (Nitrogen trifluoride)              | 13.60 | 13.73 | 13.70 | 12.92 | 12.94 | 13.43 | 13.43 | 13.44 | 13.40 | 13.74 | 14.31 |
| NH (Imidogen) (3 <sup>^-</sup> )        | 13.49 | 13.44 | 14.44 | 13.79 | 13.60 | 13.72 | 13.55 | 13.58 | 13.61 | 13.58 | 13.51 |
| NH2 (Amino radical)                     | 12.00 | 11.96 | 12.86 | 12.18 | 11.79 | 12.26 | 12.12 | 12.07 | 12.06 | 11.98 | 12.10 |
| NH3 (Ammonia)                           | 10.82 | 10.85 | 11.77 | 10.96 | 10.67 | 11.00 | 10.92 | 10.90 | 10.90 | 10.96 | 11.19 |
| NO (Nitric oxide)                       | 9.26  | 9.80  | 10.36 | 9.90  | 9.77  | 10.27 | 10.01 | 10.09 | 10.12 | 10.14 | 10.57 |
| NO2 (Nitrogen dioxide)                  | 11.23 | 11.57 | 11.81 | 11.17 | 11.06 | 11.71 | 11.65 | 11.68 | 11.65 | 11.88 | 12.70 |
| O (Oxygen atom)                         | 13.62 | 13.46 | 14.57 | 14.06 | 13.65 | 14.14 | 13.81 | 13.80 | 13.79 | 13.68 | 13.77 |
| O2 (Oxygen diatomic) (3 <sup>^g</sup> ) | 12.30 | 12.61 | 13.27 | 12.55 | 12.63 | 13.02 | 12.83 | 12.90 | 12.93 | 13.10 | 13.48 |
| O3 (Ozone)                              | 12.73 | 13.29 | 13.41 | 12.61 | 12.52 | 13.14 | 13.22 | 13.22 | 13.15 | 13.58 | 14.56 |
| OCS (Carbonyl sulfide)                  | 11.19 | 11.20 | 12.02 | 11.24 | 11.22 | 11.31 | 11.22 | 11.26 | 11.31 | 11.38 | 11.57 |
| OH (Hydroxyl radical)                   | 13.02 | 12.97 | 14.07 | 13.30 | 12.90 | 13.34 | 13.14 | 13.13 | 13.13 | 13.13 | 13.19 |

|                                        |       |       |       |       |       |       |       |       |       |       |       |
|----------------------------------------|-------|-------|-------|-------|-------|-------|-------|-------|-------|-------|-------|
| P (Phosphorus atom)                    | 10.49 | 10.45 | 11.02 | 10.49 | 10.58 | 10.39 | 10.39 | 10.40 | 10.42 | 10.32 | 10.16 |
| P2 (Phosphorus diatomic)               | 10.62 | 10.44 | 11.22 | 10.51 | 10.43 | 10.44 | 10.29 | 10.85 | 10.84 | 10.44 | 10.54 |
| PF3 (Phosphorus trifluoride)           | 12.20 | 11.74 | 12.06 | 11.27 | 11.25 | 11.62 | 11.55 | 11.59 | 11.57 | 11.67 | 12.00 |
| PH3 (Phosphine)                        | 10.59 | 10.53 | 11.15 | 10.48 | 10.54 | 10.59 | 10.49 | 10.53 | 10.56 | 10.50 | 10.37 |
| S (Sulfur atom)                        | 10.36 | 10.21 | 11.08 | 10.43 | 10.22 | 10.56 | 10.39 | 10.46 | 10.50 | 10.43 | 10.51 |
| S2 (Sulfur diatomic) (3 <sup>g</sup> ) | 9.55  | 9.52  | 10.00 | 9.46  | 9.56  | 9.62  | 9.83  | 9.76  | 9.70  | 9.66  | 9.77  |
| Si (Silicon atom)                      | 8.15  | 8.09  | 8.41  | 8.20  | 8.06  | 8.11  | 8.04  | 8.08  | 8.12  | 7.98  | 7.99  |
| Si2H6 (Disilane)                       | 10.53 | 10.56 | 10.89 | 10.27 | 10.34 | 10.44 | 10.47 | 10.48 | 10.46 | 10.48 | 10.48 |
| SiF2 (Silicon difluoride)              | 11.08 | 11.10 | 11.56 | 10.81 | 10.80 | 11.07 | 11.05 | 11.05 | 11.03 | 10.99 | 11.07 |
| SiF4 (Silicon tetrafluoride)           | 16.40 | 16.91 | 15.27 | 14.45 | 14.57 | 15.36 | 15.95 | 15.85 | 15.63 | 16.40 | 17.89 |
| SiH3 (Silyl)                           | 8.74  | 8.84  | 9.40  | 8.95  | 8.87  | 8.96  | 8.79  | 8.85  | 8.88  | 8.91  | 8.92  |
| SiH4 (Silane)                          | 12.30 | 12.86 | 12.67 | 12.14 | 12.37 | 12.47 | 12.74 | 12.67 | 12.58 | 12.59 | 12.82 |
| SiO (Silicon monoxide) <sup>7</sup>    | 11.61 | 11.51 | 12.02 | 11.29 | 11.23 | 11.47 | 11.51 | 11.53 | 11.51 | 11.55 | 11.85 |
| SO2 (Sulfur dioxide)                   | 12.50 | 12.58 | 12.86 | 12.08 | 12.01 | 12.42 | 12.51 | 12.51 | 12.46 | 12.66 | 13.26 |
| MAE <sup>a</sup>                       |       |       | 0.56  | 0.35  | 0.36  | 0.23  | 0.20  | 0.19  | 0.19  | 0.18  | 0.46  |
| MSE <sup>a</sup>                       |       |       | 0.45  | -0.25 | -0.30 | -0.03 | -0.01 | -0.01 | -0.03 | 0.09  | 0.41  |
| RMS <sup>a</sup>                       |       |       | 0.63  | 0.51  | 0.48  | 0.33  | 0.28  | 0.27  | 0.26  | 0.27  | 0.60  |
| MAE <sup>b</sup>                       |       |       | 0.58  | 0.42  | 0.39  | 0.26  | 0.16  | 0.17  | 0.20  | 0.13  | 0.37  |
| MSE <sup>b</sup>                       |       |       | 0.39  | -0.31 | -0.36 | -0.09 | -0.07 | -0.07 | -0.09 | 0.03  | 0.35  |
| RMS <sup>c</sup>                       |       |       | 0.66  | 0.61  | 0.56  | 0.37  | 0.23  | 0.24  | 0.28  | 0.18  | 0.46  |

<sup>a</sup> The reference values are experimental data.

<sup>b</sup> The reference values are calculated by CCSD.

Table S2. Vertical ionization potentials (2) [in eV] of the 121 molecules studied. Most experimental reference values are collected from the NIST database<sup>1</sup>, while other publications<sup>2-13</sup> are adopted for the molecules marked.

| Molecule                                   | Expt. | CCSD  | LDA   | PBE   | M06L  | B3LYP | $\omega$ B97 | $\omega$ B97X | $\omega$ B97X-D | M06-2X | M06-HF |
|--------------------------------------------|-------|-------|-------|-------|-------|-------|--------------|---------------|-----------------|--------|--------|
| Al (Aluminum atom)                         | 5.99  | 5.93  | 3.43  | 3.09  | 3.05  | 3.63  | 5.89         | 5.78          | 5.48            | 4.31   | 5.50   |
| AlCl3 (Aluminum trichloride)               | 12.01 | 12.25 | 8.63  | 8.01  | 8.25  | 9.13  | 12.17        | 11.86         | 11.30           | 10.74  | 12.86  |
| Ar (Argon atom)                            | 15.76 | 15.68 | 10.89 | 10.29 | 10.58 | 11.67 | 14.89        | 14.56         | 13.93           | 13.54  | 16.05  |
| B (Boron atom)                             | 8.30  | 8.19  | 4.54  | 4.17  | 4.35  | 5.16  | 7.90         | 7.72          | 7.23            | 6.16   | 7.57   |
| BCl3 (Borane, trichloro-)                  | 11.64 | 11.98 | 8.33  | 7.72  | 7.96  | 8.85  | 11.90        | 11.59         | 11.03           | 10.49  | 12.73  |
| Be (Beryllium atom) <sup>11</sup>          | 9.32  | 9.29  | 6.04  | 5.61  | 5.67  | 6.32  | 8.78         | 8.63          | 8.29            | 7.25   | 8.66   |
| BF3 (Borane, trifluoro-)                   | 15.96 | 16.34 | 10.80 | 10.05 | 10.32 | 11.94 | 14.97        | 14.78         | 14.20           | 14.52  | 18.16  |
| C (Carbon atom)                            | 11.26 | 11.18 | 6.56  | 6.10  | 6.21  | 7.33  | 10.36        | 10.12         | 9.55            | 8.83   | 11.11  |
| C2F4 (Tetrafluoroethylene)                 | 10.69 | 10.76 | 7.03  | 6.29  | 6.32  | 7.59  | 10.38        | 10.16         | 9.64            | 9.23   | 11.78  |
| C2H2 (Acetylene)                           | 11.49 | 11.33 | 7.84  | 7.20  | 7.31  | 8.19  | 11.19        | 10.91         | 10.35           | 9.73   | 11.81  |
| C2H2O2 (Ethanediol)                        | 10.60 | 10.86 | 7.01  | 6.38  | 6.53  | 7.77  | 10.60        | 10.39         | 9.85            | 9.53   | 12.15  |
| C2H4 (Ethylene)                            | 10.68 | 10.50 | 7.40  | 6.74  | 6.78  | 7.63  | 10.54        | 10.27         | 9.74            | 9.11   | 11.04  |
| C2H4O (Ethylene oxide)                     | 10.57 | 10.68 | 6.88  | 6.28  | 6.47  | 7.71  | 10.69        | 10.45         | 9.88            | 9.73   | 12.62  |
| C2H4S (Thiirane)                           | 9.05  | 9.02  | 5.93  | 5.36  | 5.47  | 6.36  | 9.27         | 8.99          | 8.46            | 7.81   | 9.94   |
| C2H5N (Aziridine)                          | 9.85  | 9.79  | 6.36  | 5.78  | 5.95  | 6.97  | 9.93         | 9.66          | 9.11            | 8.64   | 11.00  |
| C2H6 (Ethane)                              | 11.99 | 12.83 | 8.64  | 8.18  | 8.46  | 9.45  | 12.42        | 12.14         | 11.58           | 11.03  | 13.32  |
| C2HF3 (Trifluoroethylene) <sup>5</sup>     | 10.62 | 10.50 | 6.92  | 6.21  | 6.26  | 7.41  | 10.20        | 9.97          | 9.46            | 8.98   | 11.34  |
| C2N2 (Cyanogen)                            | 13.51 | 13.59 | 10.13 | 9.40  | 9.49  | 10.44 | 13.33        | 13.06         | 12.53           | 12.00  | 14.20  |
| C3H4 (Cyclopropene)                        | 9.86  | 9.90  | 6.71  | 6.11  | 6.20  | 7.05  | 9.88         | 9.62          | 9.11            | 8.51   | 10.51  |
| C3H6 (Cyclopropane)                        | 10.54 | 10.90 | 7.71  | 7.07  | 7.19  | 8.15  | 11.10        | 10.82         | 10.27           | 9.61   | 11.66  |
| C3H8 (Propane)                             | 11.51 | 12.23 | 8.21  | 7.75  | 8.01  | 9.00  | 11.93        | 11.65         | 11.10           | 10.55  | 12.74  |
| C3O2 (Carbon suboxide) <sup>10</sup>       | 10.80 | 10.69 | 7.98  | 7.26  | 7.31  | 8.24  | 10.78        | 10.60         | 10.19           | 9.65   | 11.75  |
| C4H2 (Diacyetylene)                        | 10.30 | 10.23 | 7.31  | 6.64  | 6.70  | 7.50  | 10.23        | 9.98          | 9.51            | 8.90   | 10.83  |
| C4H4O (Furan)                              | 8.90  | 8.93  | 6.35  | 5.67  | 5.67  | 6.49  | 9.18         | 8.96          | 8.49            | 7.83   | 9.68   |
| C4H6 (Cyclobutene)                         | 9.43  | 9.56  | 6.66  | 6.04  | 6.10  | 6.92  | 9.73         | 9.48          | 8.98            | 8.37   | 10.30  |
| C4N2 (2-Butynedinitrile) <sup>4</sup>      | 11.84 | 12.11 | 9.16  | 8.44  | 8.50  | 9.36  | 12.06        | 11.82         | 11.34           | 10.79  | 12.84  |
| CCl4 (Carbon tetrachloride)                | 11.69 | 11.91 | 8.29  | 7.68  | 7.93  | 8.84  | 11.90        | 11.58         | 11.01           | 10.48  | 12.73  |
| CF2Cl2                                     |       |       |       |       |       |       |              |               |                 |        |        |
| (Difluorodichloromethane)                  | 12.24 | 12.43 | 8.70  | 8.07  | 8.30  | 9.28  | 12.34        | 12.02         | 11.44           | 10.94  | 13.24  |
| CF2O (Carbonic difluoride)                 | 13.60 | 13.58 | 9.25  | 8.51  | 8.71  | 10.13 | 13.16        | 12.92         | 12.33           | 12.32  | 15.42  |
| CF3Br (Bromotrifluoromethane) <sup>8</sup> | 12.08 | 12.04 | 8.49  | 7.83  | 7.98  | 8.98  | 11.90        | 11.65         | 11.12           | 10.57  | 12.81  |
| CF3Cl (Methane, chlorotrifluoro-)          | 13.08 | 13.10 | 9.20  | 8.55  | 8.76  | 9.84  | 12.95        | 12.64         | 12.04           | 11.60  | 14.05  |
| CF4 (Carbon tetrafluoride)                 | 16.20 | 16.77 | 11.15 | 10.40 | 10.70 | 12.35 | 15.38        | 15.19         | 14.61           | 14.97  | 18.67  |
| CFCl3                                      | 11.76 | 12.02 | 8.35  | 7.74  | 7.98  | 8.91  | 11.97        | 11.65         | 11.08           | 10.56  | 12.84  |

(Trichloromonofluoromethane)

|                                                                      |       |       |       |       |       |       |       |       |       |       |       |
|----------------------------------------------------------------------|-------|-------|-------|-------|-------|-------|-------|-------|-------|-------|-------|
| CH <sub>2</sub> CCH <sub>2</sub> (Allene)                            | 10.20 | 10.15 | 7.19  | 6.57  | 6.63  | 7.51  | 10.37 | 10.11 | 9.59  | 8.95  | 10.96 |
| CH <sub>2</sub> CCl <sub>2</sub> (Ethene, 1,1-dichloro-)             | 10.00 | 10.00 | 7.08  | 6.44  | 6.53  | 7.37  | 10.17 | 9.92  | 9.42  | 8.78  | 10.75 |
| CH <sub>2</sub> CF <sub>2</sub> (Ethene, 1,1-difluoro-) <sup>5</sup> | 10.70 | 10.67 | 7.25  | 6.56  | 6.63  | 7.66  | 10.51 | 10.27 | 9.74  | 9.22  | 11.44 |
| CH <sub>2</sub> CHCHO (Acrolein) <sup>13</sup>                       | 10.10 | 10.11 | 6.62  | 6.00  | 6.19  | 7.40  | 10.35 | 10.12 | 9.56  | 9.33  | 11.72 |
| CH <sub>2</sub> CHCl (Ethene, chloro-)                               | 10.20 | 10.11 | 7.06  | 6.42  | 6.51  | 7.34  | 10.17 | 9.91  | 9.41  | 8.78  | 10.73 |
| CH <sub>2</sub> CHF (Ethene, fluoro-)                                | 10.63 | 10.52 | 7.19  | 6.52  | 6.59  | 7.54  | 10.41 | 10.16 | 9.64  | 9.07  | 11.16 |
| CH <sub>2</sub> Cl <sub>2</sub> (Methylene chloride)                 | 11.40 | 11.66 | 7.95  | 7.38  | 7.56  | 8.55  | 11.58 | 11.28 | 10.71 | 10.15 | 12.37 |
| CH <sub>2</sub> CO (Ketene)                                          | 9.64  | 9.68  | 6.57  | 5.91  | 5.97  | 6.93  | 9.71  | 9.48  | 8.99  | 8.39  | 10.47 |
| CH <sub>2</sub> F <sub>2</sub> (Methane, difluoro-)                  | 13.27 | 13.69 | 8.73  | 8.14  | 8.38  | 9.76  | 12.73 | 12.50 | 11.92 | 11.78 | 14.77 |
| CH <sub>3</sub> (Methyl radical)                                     | 9.84  | 9.71  | 5.83  | 5.43  | 5.54  | 6.47  | 9.41  | 9.15  | 8.58  | 7.84  | 9.48  |
| CH <sub>3</sub> CCCH <sub>3</sub> (2-Butyne)                         | 9.79  | 9.64  | 6.53  | 5.93  | 6.05  | 6.90  | 9.76  | 9.50  | 8.98  | 8.38  | 10.38 |
| CH <sub>3</sub> CCH (Propyne)                                        | 10.37 | 10.39 | 7.11  | 6.49  | 6.60  | 7.48  | 10.40 | 10.13 | 9.59  | 8.98  | 11.03 |
| CH <sub>3</sub> CH <sub>2</sub> Cl (Ethyl chloride)                  | 11.06 | 11.12 | 7.54  | 6.97  | 7.16  | 8.12  | 11.16 | 10.85 | 10.28 | 9.73  | 11.92 |
| CH <sub>3</sub> CH <sub>2</sub> OH (Ethanol)                         | 10.64 | 10.75 | 6.75  | 6.16  | 6.35  | 7.60  | 10.61 | 10.35 | 9.77  | 9.53  | 12.24 |
| CH <sub>3</sub> Cl (Methyl chloride)                                 | 11.29 | 11.38 | 7.67  | 7.11  | 7.31  | 8.27  | 11.30 | 10.99 | 10.43 | 9.87  | 12.10 |
| CH <sub>3</sub> COCl (Acetyl Chloride)                               | 11.03 | 11.23 | 7.77  | 7.12  | 7.32  | 8.39  | 11.25 | 11.02 | 10.50 | 10.14 | 12.52 |
| CH <sub>3</sub> F (Methyl fluoride)                                  | 13.04 | 13.46 | 8.67  | 8.09  | 8.37  | 9.68  | 12.68 | 12.44 | 11.87 | 11.71 | 14.51 |
| CH <sub>3</sub> NHCH <sub>3</sub> (Dimethylamine)                    | 8.95  | 8.99  | 5.61  | 5.07  | 5.25  | 6.27  | 9.19  | 8.92  | 8.38  | 7.94  | 10.23 |
| CH <sub>3</sub> NO <sub>2</sub> (Methane, nitro-)                    | 11.29 | 11.41 | 7.59  | 6.91  | 7.08  | 8.49  | 11.50 | 11.27 | 10.69 | 10.65 | 12.90 |
| CH <sub>3</sub> OCH <sub>3</sub> (Dimethyl ether)                    | 10.10 | 10.11 | 6.41  | 5.84  | 6.04  | 7.21  | 10.13 | 9.89  | 9.34  | 9.08  | 11.68 |
| CH <sub>3</sub> OH (Methyl alcohol)                                  | 10.96 | 11.02 | 6.85  | 6.26  | 6.47  | 7.72  | 10.73 | 10.48 | 9.90  | 9.68  | 12.43 |
| CH <sub>3</sub> SH (Methanethiol)                                    | 9.44  | 9.39  | 6.12  | 5.56  | 5.71  | 6.58  | 9.51  | 9.22  | 8.69  | 8.00  | 9.97  |
| CH <sub>3</sub> SiH <sub>3</sub> (Methyl silane)                     | 11.60 | 11.73 | 8.48  | 7.91  | 8.10  | 9.00  | 11.93 | 11.66 | 11.12 | 10.38 | 12.35 |
| CH <sub>4</sub> (Methane)                                            | 13.60 | 14.38 | 9.96  | 9.46  | 9.75  | 10.78 | 13.90 | 13.59 | 12.98 | 12.44 | 14.83 |
| CHCl <sub>3</sub> (Chloroform)                                       | 11.50 | 11.63 | 8.02  | 7.41  | 7.65  | 8.55  | 11.59 | 11.28 | 10.72 | 10.18 | 12.41 |
| CHF <sub>3</sub> (Methane, trifluoro-)                               | 15.50 | 14.97 | 9.98  | 9.33  | 9.53  | 11.00 | 13.96 | 13.73 | 13.15 | 13.05 | 16.13 |
| CHONH <sub>2</sub> (Formamide) <sup>3</sup>                          | 10.40 | 10.31 | 6.64  | 6.02  | 6.16  | 7.42  | 10.37 | 10.12 | 9.56  | 9.37  | 11.80 |
| Cl (Chlorine atom)                                                   | 12.97 | 12.84 | 8.49  | 8.14  | 8.18  | 9.35  | 12.44 | 12.13 | 11.55 | 10.94 | 13.41 |
| Cl <sub>2</sub> (Chlorine diatomic)                                  | 11.49 | 11.64 | 7.90  | 7.31  | 7.46  | 8.46  | 11.48 | 11.18 | 10.63 | 10.05 | 12.35 |
| ClF (Chlorine monofluoride)                                          | 12.77 | 12.81 | 8.48  | 7.85  | 8.03  | 9.23  | 12.31 | 12.02 | 11.43 | 11.03 | 13.65 |
| ClF <sub>3</sub> (Chlorine trifluoride)                              | 13.05 | 13.24 | 8.67  | 7.99  | 8.17  | 9.62  | 12.65 | 12.40 | 11.82 | 11.72 | 14.83 |
| ClO (Monochlorine monoxide)                                          | 11.01 | 11.03 | 6.69  | 6.28  | 6.32  | 7.72  | 10.71 | 10.46 | 9.89  | 9.49  | 12.40 |
| CO (Carbon monoxide)                                                 | 14.01 | 14.01 | 9.60  | 9.04  | 9.21  | 10.53 | 13.73 | 13.42 | 12.79 | 12.27 | 15.08 |
| CO <sub>2</sub> (Carbon dioxide)                                     | 13.78 | 13.77 | 9.81  | 9.09  | 9.23  | 10.46 | 13.38 | 13.15 | 12.61 | 12.34 | 15.02 |
| CS (Carbon monosulfide) <sup>9</sup>                                 | 11.34 | 11.35 | 7.92  | 7.39  | 7.52  | 8.68  | 11.79 | 11.50 | 10.92 | 10.19 | 12.68 |
| CS <sub>2</sub> (Carbon disulfide)                                   | 10.09 | 9.97  | 7.42  | 6.82  | 6.98  | 7.62  | 10.21 | 9.98  | 9.58  | 8.81  | 10.42 |
| F (Fluorine atom)                                                    | 17.42 | 17.28 | 10.89 | 10.31 | 10.46 | 12.29 | 15.37 | 15.15 | 14.53 | 14.85 | 18.65 |



|                                        |       |       |       |       |       |       |       |       |       |       |       |
|----------------------------------------|-------|-------|-------|-------|-------|-------|-------|-------|-------|-------|-------|
| F2 (Fluorine diatomic)                 | 15.70 | 16.08 | 10.15 | 9.46  | 9.77  | 11.53 | 14.56 | 14.38 | 13.78 | 14.20 | 18.02 |
| F2O (Difluorine monoxide)              | 13.26 | 13.55 | 8.37  | 7.69  | 7.89  | 9.69  | 12.74 | 12.53 | 11.92 | 12.17 | 16.05 |
| FCN (Cyanogen fluoride) <sup>3</sup>   | 13.65 | 13.52 | 9.45  | 8.73  | 8.85  | 9.97  | 12.99 | 12.71 | 12.13 | 11.70 | 14.13 |
| H (Hydrogen atom)                      | 13.60 | 13.60 | 7.80  | 7.59  | 7.95  | 8.78  | 11.91 | 11.62 | 11.06 | 10.30 | 12.23 |
| H2CO (Formaldehyde)                    | 10.89 | 10.88 | 6.83  | 6.26  | 6.48  | 7.67  | 10.56 | 10.34 | 9.80  | 9.54  | 12.29 |
| H2CS (Thioformaldehyde)                | 9.38  | 9.32  | 6.08  | 5.53  | 5.63  | 6.53  | 9.41  | 9.14  | 8.63  | 7.95  | 10.10 |
| H2O (Water) <sup>6</sup>               | 12.62 | 12.63 | 7.88  | 7.25  | 7.43  | 8.84  | 11.99 | 11.70 | 11.07 | 11.00 | 14.08 |
| H2O2 (Hydrogen peroxide)               | 11.70 | 11.79 | 7.08  | 6.45  | 6.62  | 8.10  | 11.20 | 10.94 | 10.32 | 10.29 | 13.54 |
| H2S (Hydrogen sulfide)                 | 10.50 | 10.38 | 6.88  | 6.31  | 6.45  | 7.33  | 10.32 | 10.02 | 9.48  | 8.76  | 10.72 |
| HCCCN (Cyanoacetylene) <sup>2</sup>    | 11.75 | 11.70 | 8.56  | 7.87  | 7.94  | 8.80  | 11.60 | 11.35 | 10.85 | 10.27 | 12.32 |
| HCCF (Fluoroacetylene) <sup>5</sup>    | 11.50 | 11.34 | 7.68  | 7.01  | 7.11  | 8.11  | 11.06 | 10.80 | 10.25 | 9.71  | 11.95 |
| HCl (Hydrogen chloride) <sup>12</sup>  | 12.77 | 12.69 | 8.63  | 8.05  | 8.24  | 9.24  | 12.36 | 12.04 | 11.44 | 10.89 | 13.18 |
| HCN (Hydrogen cyanide)                 | 13.61 | 13.62 | 9.68  | 9.02  | 9.16  | 10.13 | 13.24 | 12.93 | 12.33 | 11.80 | 14.08 |
| HCO (Formyl radical)                   | 9.31  | 9.68  | 5.58  | 5.16  | 5.23  | 6.52  | 9.38  | 9.16  | 8.61  | 8.05  | 10.63 |
| HCOOH (Formic acid)                    | 11.50 | 11.26 | 7.39  | 6.72  | 6.85  | 8.16  | 11.13 | 10.89 | 10.32 | 10.15 | 13.08 |
| He (Helium atom)                       | 24.59 | 24.56 | 16.02 | 15.76 | 16.54 | 18.00 | 21.13 | 20.91 | 20.28 | 20.61 | 24.16 |
| HF (Hydrogen fluoride)                 | 16.12 | 16.12 | 10.31 | 9.65  | 9.89  | 11.55 | 14.68 | 14.44 | 13.82 | 14.12 | 17.77 |
| Li (Lithium atom)                      | 5.39  | 5.34  | 3.58  | 3.22  | 3.22  | 3.65  | 5.34  | 5.31  | 5.20  | 4.17  | 5.20  |
| Mg (Magnesium atom)                    | 7.65  | 7.53  | 5.20  | 4.70  | 4.72  | 5.30  | 7.35  | 7.32  | 7.08  | 6.18  | 7.40  |
| N (Nitrogen atom)                      | 14.53 | 14.47 | 8.85  | 8.30  | 8.59  | 9.78  | 12.93 | 12.70 | 12.10 | 11.76 | 14.41 |
| N2 (Nitrogen diatomic)                 | 15.58 | 15.71 | 10.90 | 10.27 | 10.35 | 11.97 | 15.13 | 14.87 | 14.25 | 13.95 | 17.18 |
| N2H4 (Hydrazine)                       | 8.98  | 9.84  | 5.84  | 5.30  | 5.48  | 6.62  | 9.64  | 9.36  | 8.77  | 8.39  | 10.99 |
| N2O (Nitrous oxide)                    | 12.89 | 12.77 | 9.12  | 8.40  | 8.47  | 9.62  | 12.40 | 12.19 | 11.70 | 11.29 | 13.78 |
| Na (Sodium atom)                       | 5.14  | 4.68  | 3.50  | 3.04  | 2.96  | 3.49  | 4.83  | 4.93  | 4.89  | 4.19  | 5.20  |
| NaCl (Sodium Chloride)                 | 9.80  | 9.12  | 5.86  | 5.27  | 5.26  | 6.32  | 9.20  | 8.91  | 8.36  | 7.79  | 9.99  |
| Ne (Neon atom)                         | 21.57 | 21.46 | 14.06 | 13.35 | 13.74 | 15.65 | 18.64 | 18.51 | 17.92 | 18.69 | 22.84 |
| NF3 (Nitrogen trifluoride)             | 13.60 | 13.73 | 9.10  | 8.43  | 8.57  | 10.08 | 13.07 | 12.83 | 12.24 | 12.11 | 15.28 |
| NH (Imidogen) (3 <sup>-</sup> )        | 13.49 | 13.44 | 8.41  | 7.92  | 8.13  | 9.36  | 12.47 | 12.21 | 11.61 | 11.28 | 13.96 |
| NH2 (Amino radical)                    | 12.00 | 11.96 | 7.70  | 7.22  | 7.32  | 8.56  | 11.64 | 11.33 | 10.72 | 10.29 | 12.95 |
| NH3 (Ammonia)                          | 10.82 | 10.85 | 6.75  | 6.18  | 6.37  | 7.51  | 10.62 | 10.31 | 9.70  | 9.33  | 11.90 |
| NO (Nitric oxide)                      | 9.26  | 9.80  | 4.95  | 4.52  | 4.50  | 6.18  | 9.12  | 8.89  | 8.31  | 8.04  | 11.39 |
| NO2 (Nitrogen dioxide)                 | 11.23 | 11.57 | 7.05  | 6.49  | 6.46  | 8.17  | 11.11 | 10.89 | 10.31 | 10.12 | 13.55 |
| O (Oxygen atom)                        | 13.62 | 13.46 | 7.98  | 7.60  | 7.75  | 9.27  | 12.35 | 12.07 | 11.42 | 11.22 | 14.11 |
| O2 (Oxygen diatomic) (3 <sup>g</sup> ) | 12.30 | 12.61 | 7.40  | 6.82  | 7.08  | 8.72  | 11.73 | 11.52 | 10.93 | 11.00 | 14.52 |
| O3 (Ozone)                             | 12.73 | 13.29 | 8.71  | 8.00  | 8.07  | 9.69  | 12.72 | 12.49 | 11.89 | 11.66 | 13.75 |
| OCS (Carbonyl sulfide)                 | 11.19 | 11.20 | 8.14  | 7.50  | 7.65  | 8.47  | 11.23 | 10.99 | 10.53 | 9.85  | 11.75 |
| OH (Hydroxyl radical)                  | 13.02 | 12.97 | 7.93  | 7.39  | 7.44  | 9.01  | 12.13 | 11.85 | 11.21 | 11.11 | 14.41 |
| P (Phosphorus atom)                    | 10.49 | 10.45 | 6.74  | 6.30  | 6.43  | 7.12  | 10.07 | 9.79  | 9.26  | 8.37  | 10.07 |

|                                        |       |       |       |       |       |       |       |       |       |       |       |
|----------------------------------------|-------|-------|-------|-------|-------|-------|-------|-------|-------|-------|-------|
| P2 (Phosphorus diatomic)               | 10.62 | 10.44 | 7.72  | 7.14  | 7.22  | 7.85  | 10.50 | 10.30 | 9.90  | 9.00  | 10.53 |
| PF3 (Phosphorus trifluoride)           | 12.20 | 11.74 | 7.98  | 7.34  | 7.45  | 8.56  | 11.41 | 11.17 | 10.64 | 10.04 | 12.35 |
| PH3 (Phosphine)                        | 10.59 | 10.53 | 7.24  | 6.71  | 6.87  | 7.67  | 10.51 | 10.26 | 9.77  | 8.96  | 10.74 |
| S (Sulfur atom)                        | 10.36 | 10.21 | 6.66  | 6.16  | 6.14  | 7.21  | 10.09 | 9.84  | 9.33  | 8.53  | 10.60 |
| S2 (Sulfur diatomic) (3 <sup>g</sup> ) | 9.55  | 9.52  | 6.29  | 5.82  | 5.89  | 6.81  | 9.72  | 9.43  | 8.90  | 8.13  | 10.21 |
| Si (Silicon atom)                      | 8.15  | 8.09  | 4.79  | 4.61  | 4.57  | 5.29  | 7.94  | 7.74  | 7.31  | 6.25  | 7.82  |
| Si2H6 (Disilane)                       | 10.53 | 10.56 | 7.72  | 7.18  | 7.33  | 8.09  | 10.81 | 10.58 | 10.11 | 9.28  | 11.11 |
| SiF2 (Silicon difluoride)              | 11.08 | 11.10 | 7.73  | 7.12  | 7.21  | 8.15  | 10.86 | 10.67 | 10.20 | 9.43  | 11.32 |
| SiF4 (Silicon tetrafluoride)           | 16.40 | 16.91 | 11.44 | 10.68 | 10.95 | 12.52 | 15.57 | 15.36 | 14.77 | 15.05 | 18.59 |
| SiH3 (Silyl)                           | 8.74  | 8.84  | 5.76  | 5.37  | 5.43  | 6.15  | 8.80  | 8.60  | 8.16  | 7.24  | 8.93  |
| SiH4 (Silane)                          | 12.30 | 12.86 | 9.00  | 8.52  | 8.86  | 9.67  | 12.66 | 12.37 | 11.82 | 11.10 | 13.12 |
| SiO (Silicon monoxide) <sup>7</sup>    | 11.61 | 11.51 | 8.06  | 7.47  | 7.57  | 8.61  | 11.43 | 11.23 | 10.74 | 10.10 | 12.34 |
| SO2 (Sulfur dioxide)                   | 12.50 | 12.58 | 8.71  | 8.03  | 8.07  | 9.39  | 12.29 | 12.07 | 11.53 | 11.12 | 13.92 |
| MAE <sup>a</sup>                       |       |       | 3.86  | 4.44  | 4.29  | 3.19  | 0.42  | 0.55  | 1.06  | 1.51  | 0.99  |
| MSE <sup>a</sup>                       |       |       | -3.86 | -4.44 | -4.29 | -3.19 | -0.28 | -0.53 | -1.06 | -1.51 | 0.89  |
| RMS <sup>a</sup>                       |       |       | 3.98  | 4.55  | 4.39  | 3.27  | 0.67  | 0.80  | 1.24  | 1.59  | 1.15  |
| MAE <sup>b</sup>                       |       |       | 3.92  | 4.50  | 4.35  | 3.25  | 0.41  | 0.59  | 1.13  | 1.57  | 0.91  |
| MSE <sup>b</sup>                       |       |       | -3.92 | -4.50 | -4.35 | -3.25 | -0.34 | -0.59 | -1.12 | -1.57 | 0.84  |
| RMS <sup>b</sup>                       |       |       | 4.05  | 4.61  | 4.45  | 3.32  | 0.67  | 0.82  | 1.28  | 1.63  | 1.04  |

<sup>a</sup> The reference values are experimental data.

<sup>b</sup> The reference values are calculated by CCSD.

Table S3. Vertical electron affinities (1) [in eV] of the 121 molecules studied. The reference values are calculated by CCSD.

| Molecule                           | CCSD  | LDA   | PBE   | M06L  | B3LYP | $\omega$ B97 | $\omega$ B97X | $\omega$ B97X-D | M06-2X | M06-HF |
|------------------------------------|-------|-------|-------|-------|-------|--------------|---------------|-----------------|--------|--------|
| Al (Aluminum atom)                 | 0.38  | 1.02  | 0.59  | 0.33  | 0.46  | 0.20         | 0.28          | 0.38            | 0.31   | 0.34   |
| AlCl3 (Aluminum trichloride)       | 0.02  | 0.85  | 0.31  | -0.33 | 0.24  | -0.29        | -0.17         | -0.08           | 0.10   | 0.59   |
| Ar (Argon atom)                    | -2.81 | -2.05 | -2.59 | -3.14 | -2.57 | -2.94        | -2.88         | -2.73           | -2.54  | -2.19  |
| B (Boron atom)                     | 0.18  | 1.13  | 0.62  | 0.26  | 0.46  | 0.12         | 0.24          | 0.35            | 0.25   | 0.14   |
| BCl3 (Borane, trichloro-)          | -0.25 | 0.48  | -0.02 | -0.25 | -0.07 | -0.17        | -0.13         | -0.13           | -0.10  | 0.12   |
| Be (Beryllium atom)                | -0.38 | 0.37  | 0.01  | -0.21 | -0.07 | -0.43        | -0.35         | -0.24           | -0.30  | -0.37  |
| BF3 (Borane, trifluoro-)           | -1.04 | -0.15 | -0.60 | -0.82 | -0.62 | -1.12        | -1.01         | -0.97           | -0.84  | -0.42  |
| C (Carbon atom)                    | 1.16  | 2.22  | 1.59  | 1.29  | 1.37  | 1.14         | 1.23          | 1.31            | 1.26   | 1.12   |
| C2F4 (Tetrafluoroethylene)         | -1.21 | -0.32 | -0.78 | -1.66 | -0.81 | -1.32        | -1.29         | -1.21           | -1.10  | -1.30  |
| C2H2 (Acetylene)                   | -2.01 | -0.09 | -0.37 | -0.47 | -0.43 | -0.71        | -0.70         | -0.65           | -0.64  | -1.89  |
| C2H2O2 (Ethanediol)                | 0.63  | 1.71  | 1.05  | 0.79  | 1.06  | 0.83         | 0.89          | 0.91            | 0.95   | 1.13   |
| C2H4 (Ethylene)                    | -1.82 | -0.12 | -0.46 | -0.69 | -0.63 | -0.75        | -0.73         | -0.86           | -0.81  | -1.70  |
| C2H4O (Ethylene oxide)             | -0.87 | -0.04 | -0.39 | -0.70 | -0.43 | -0.68        | -0.67         | -0.61           | -0.77  | -0.73  |
| C2H4S (Thiirane)                   | -0.79 | -0.10 | -0.44 | -0.69 | -0.51 | -0.69        | -0.67         | -0.61           | -0.74  | -0.64  |
| C2H5N (Aziridine)                  | -0.56 | 0.00  | -0.36 | -0.64 | -0.41 | -0.65        | -0.63         | -0.56           | -0.57  | -0.22  |
| C2H6 (Ethane)                      | -0.63 | -0.06 | -0.42 | -0.78 | -0.47 | -0.72        | -0.71         | -0.66           | -0.60  | -0.24  |
| C2HF3 (Trifluoroethylene)          | -0.56 | 0.02  | -0.35 | -1.57 | -0.40 | -0.66        | -0.64         | -0.57           | -1.58  | -1.47  |
| C2N2 (Cyanogen)                    | -0.22 | 0.80  | 0.16  | -0.08 | 0.22  | 0.06         | 0.11          | 0.12            | 0.10   | 0.32   |
| C3H4 (Cyclopropene)                | -1.76 | -0.11 | -0.43 | -1.54 | -0.51 | -0.72        | -0.70         | -0.64           | -0.60  | -1.60  |
| C3H6 (Cyclopropane)                | -0.66 | -0.08 | -0.43 | -0.72 | -0.49 | -0.77        | -0.75         | -0.70           | -0.61  | -0.25  |
| C3H8 (Propane)                     | -0.61 | -0.02 | -0.38 | -0.69 | -0.44 | -0.73        | -0.71         | -0.66           | -0.55  | -0.16  |
| C3O2 (Carbon suboxide)             | -0.66 | -0.11 | -0.75 | -1.01 | -0.57 | -1.00        | -0.97         | -0.91           | -0.77  | -0.07  |
| C4H2 (Diacetylene)                 | -1.24 | -0.13 | -0.65 | -1.00 | -0.72 | -0.66        | -0.65         | -0.99           | -0.97  | -0.89  |
| C4H4O (Furan)                      | -0.74 | -0.01 | -0.35 | -0.62 | -0.41 | -0.67        | -0.65         | -0.60           | -1.49  | -1.45  |
| C4H6 (Cyclobutene)                 | -2.30 | -0.04 | -0.39 | -0.95 | -0.45 | -0.72        | -0.71         | -0.65           | -1.16  | -2.24  |
| C4N2 (2-Butynedinitrile)           | 0.64  | 1.76  | 1.08  | 0.87  | 1.11  | 0.95         | 0.99          | 1.01            | 1.01   | 1.23   |
| CCl4 (Carbon tetrachloride)        | -0.39 | 0.77  | 0.24  | -0.04 | 0.10  | -0.48        | -0.39         | -0.25           | -0.26  | -0.45  |
| CF2Cl2 (Difluorodichloromethane)   | -0.89 | 0.04  | -0.43 | -0.83 | -0.52 | -1.14        | -1.06         | -0.92           | -0.87  | -0.58  |
| CF2O (Carbonic difluoride)         | -2.39 | -0.30 | -0.76 | -1.36 | -0.78 | -1.25        | -1.21         | -1.14           | -1.48  | -1.48  |
| CF3Br (Bromotrifluoromethane)      | -0.79 | 0.03  | -0.46 | -0.80 | -0.49 | -0.95        | -0.87         | -0.75           | -0.74  | -0.54  |
| CF3Cl (Methane, chlorotrifluoro-)  | -1.05 | -0.31 | -0.74 | -1.23 | -0.81 | -1.22        | -1.17         | -1.08           | -1.06  | -0.69  |
| CF4 (Carbon tetrafluoride)         | -1.34 | -0.59 | -1.02 | -1.72 | -1.07 | -1.53        | -1.52         | -1.47           | -1.30  | -0.86  |
| CFCl3 (Trichloromonofluoromethane) | -0.62 | 0.44  | -0.07 | -0.46 | -0.17 | -0.77        | -0.68         | -0.55           | -0.56  | -0.70  |
| CH2CCH2 (Allene)                   | -0.57 | -0.02 | -0.37 | -0.76 | -0.42 | -0.67        | -0.66         | -0.62           | -0.91  | -0.18  |
| CH2CCl2 (Ethene, 1,1-dichloro-)    | -0.97 | -0.21 | -0.34 | -1.05 | -0.41 | -0.67        | -0.65         | -0.59           | -0.57  | -0.20  |

|                                |       |       |       |       |       |       |       |       |       |       |
|--------------------------------|-------|-------|-------|-------|-------|-------|-------|-------|-------|-------|
| CH2CF2 (Ethene, 1,1-difluoro-) | -0.97 | -0.01 | -0.37 | -0.60 | -0.42 | -0.67 | -0.65 | -0.60 | -0.57 | -1.50 |
| CH2CHCHO (Acrolein)            | -0.46 | 0.68  | 0.06  | -0.20 | 0.03  | -0.15 | -0.11 | -0.10 | -0.06 | 0.05  |
| CH2CHCl (Ethene, chloro-)      | -0.86 | -0.54 | -0.39 | -1.30 | -0.44 | -0.67 | -0.65 | -0.58 | -1.31 | -1.30 |
| CH2CHF (Ethene, fluoro-)       | -0.87 | -0.08 | -0.42 | -1.54 | -1.37 | -0.69 | -0.67 | -0.61 | -1.65 | -1.71 |
| CH2Cl2 (Methylene chloride)    | -0.51 | 0.13  | -0.29 | -0.65 | -0.35 | -0.64 | -0.61 | -0.54 | -0.55 | -0.23 |
| CH2CO (Ketene)                 | -0.52 | -0.01 | -0.40 | -0.62 | -0.37 | -0.63 | -0.61 | -0.55 | -0.81 | -0.80 |
| CH2F2 (Methane, difluoro-)     | -0.59 | -0.04 | -0.38 | -0.66 | -0.42 | -0.65 | -0.63 | -0.57 | -0.61 | -0.33 |
| CH3 (Methyl radical)           | -0.23 | 0.82  | 0.06  | -0.22 | 0.01  | -0.22 | -0.15 | -0.10 | -0.09 | 0.03  |
| CH3CCCH3 (2-Butyne)            | -0.68 | 0.06  | -0.30 | -0.54 | -0.93 | -0.67 | -0.66 | -0.61 | -0.60 | -0.63 |
| CH3CCH (Propyne)               | -0.55 | 0.01  | -0.35 | -0.64 | -0.41 | -0.64 | -0.62 | -0.56 | -0.52 | -0.54 |
| CH3CH2Cl (Ethyl chloride)      | -0.52 | 0.06  | -0.32 | -0.77 | -0.37 | -0.63 | -0.60 | -0.54 | -0.54 | -0.16 |
| CH3CH2OH (Ethanol)             | -0.54 | 0.07  | -0.31 | -0.66 | -0.36 | -0.64 | -0.62 | -0.55 | -0.53 | -0.17 |
| CH3Cl (Methyl chloride)        | -0.52 | 0.06  | -0.32 | -0.58 | -0.37 | -0.62 | -0.59 | -0.53 | -0.55 | -1.14 |
| CH3COCl (Acetyl Chloride)      | -0.91 | 0.19  | -0.25 | -0.51 | -0.27 | -0.55 | -0.53 | -0.47 | -0.70 | -0.69 |
| CH3F (Methyl fluoride)         | -0.59 | -0.05 | -0.39 | -0.61 | -0.43 | -0.65 | -0.63 | -0.58 | -0.60 | -0.32 |
| CH3NHCH3 (Dimethylamine)       | -0.56 | 0.03  | -0.34 | -0.62 | -0.40 | -0.68 | -0.67 | -0.60 | -0.52 | -0.32 |
| CH3NO2 (Methane, nitro-)       | -0.28 | 0.56  | 0.07  | -0.18 | 0.06  | -0.49 | -0.47 | -0.41 | -0.16 | 0.18  |
| CH3OCH3 (Dimethyl ether)       | -0.59 | 0.00  | -0.36 | -0.67 | -0.41 | -0.69 | -0.68 | -0.62 | -0.55 | -0.19 |
| CH3OH (Methyl alcohol)         | -0.55 | 0.03  | -0.34 | -0.58 | -0.38 | -0.64 | -0.62 | -0.55 | -0.56 | -0.27 |
| CH3SH (Methanethiol)           | -0.52 | 0.09  | -0.31 | -0.69 | -0.36 | -0.64 | -0.62 | -0.56 | -0.53 | -0.21 |
| CH3SiH3 (Methyl silane)        | -0.53 | 0.05  | -0.32 | -0.57 | -0.37 | -0.64 | -0.63 | -0.57 | -0.49 | -0.14 |
| CH4 (Methane)                  | -0.63 | -0.09 | -0.44 | -0.74 | -0.48 | -0.68 | -0.67 | -0.62 | -0.61 | -0.32 |
| CHCl3 (Chloroform)             | -0.55 | 0.27  | -0.22 | -0.54 | -0.33 | -0.69 | -0.65 | -0.57 | -0.56 | -0.24 |
| CHF3 (Methane, trifluoro-)     | -0.61 | -0.07 | -0.42 | -0.69 | -0.46 | -0.68 | -0.65 | -0.59 | -0.60 | -0.36 |
| CHONH2 (Formamide)             | -0.36 | 0.19  | -0.18 | -1.55 | -0.22 | -0.44 | -0.41 | -0.34 | -1.61 | -1.54 |
| Cl (Chlorine atom)             | 3.51  | 3.97  | 3.65  | 3.59  | 3.67  | 3.56  | 3.62  | 3.66  | 3.61  | 3.65  |
| Cl2 (Chlorine diatomic)        | 0.64  | 1.45  | 0.89  | 0.61  | 0.90  | 0.69  | 0.73  | 0.75  | 0.70  | 0.79  |
| ClF (Chlorine monofluoride)    | 0.34  | 1.21  | 0.62  | 0.32  | 0.65  | 0.44  | 0.46  | 0.46  | 0.39  | 0.47  |
| ClF3 (Chlorine trifluoride)    | 1.19  | 1.69  | 1.05  | 0.83  | 1.29  | 1.18  | 1.18  | 1.14  | 1.23  | 1.60  |
| ClO (Monochlorine monoxide)    | 2.04  | 2.31  | 1.95  | 1.80  | 2.07  | 2.06  | 2.05  | 2.03  | 2.16  | 2.38  |
| CO (Carbon monoxide)           | -1.49 | -0.48 | -0.91 | -1.18 | -0.99 | -1.53 | -1.50 | -1.25 | -1.32 | -1.41 |
| CO2 (Carbon dioxide)           | -0.84 | -0.18 | -0.65 | -1.37 | -0.65 | -1.06 | -1.02 | -0.95 | -0.87 | -0.59 |
| CS (Carbon monosulfide)        | -0.08 | 0.61  | 0.10  | -0.12 | 0.16  | -1.14 | -1.10 | 0.09  | -0.01 | 0.13  |
| CS2 (Carbon disulfide)         | 0.07  | 0.54  | 0.03  | -0.22 | 0.14  | -1.23 | 0.19  | 0.14  | 0.07  | 0.37  |
| F (Fluorine atom)              | 3.21  | 4.63  | 3.65  | 3.08  | 3.53  | 3.44  | 3.38  | 3.34  | 3.27  | 3.37  |
| F2 (Fluorine diatomic)         | 0.42  | 1.32  | 0.67  | 0.35  | 0.81  | 0.62  | 0.61  | 0.58  | 0.54  | 0.68  |
| F2O (Difluorine monoxide)      | -0.38 | 0.55  | -0.08 | -0.45 | 0.04  | -0.24 | -0.23 | -0.24 | -0.32 | -0.19 |
| FCN (Cyanogen fluoride)        | -0.69 | 0.07  | -0.42 | -1.06 | -0.44 | -0.87 | -0.82 | -0.74 | -0.68 | -0.43 |

|                              |       |       |       |       |       |       |       |       |       |       |
|------------------------------|-------|-------|-------|-------|-------|-------|-------|-------|-------|-------|
| H (Hydrogen atom)            | 0.74  | 1.31  | 0.71  | 0.59  | 0.91  | 0.65  | 0.74  | 0.81  | 0.61  | 0.65  |
| H2CO (Formaldehyde)          | -0.55 | 0.01  | -0.49 | -0.81 | -0.40 | -1.01 | -0.59 | -0.83 | -0.82 | -0.79 |
| H2CS (Thioformaldehyde)      | 0.26  | 0.95  | 0.42  | 0.24  | 0.46  | 0.42  | 0.43  | 0.41  | 0.37  | 0.43  |
| H2O (Water)                  | -0.58 | 0.02  | -0.38 | -0.80 | -0.40 | -0.69 | -0.66 | -0.59 | -0.59 | -0.38 |
| H2O2 (Hydrogen peroxide)     | -0.92 | -0.01 | -0.41 | -0.78 | -0.55 | -0.79 | -0.75 | -0.68 | -0.85 | -0.84 |
| H2S (Hydrogen sulfide)       | -0.50 | 0.08  | -0.32 | -0.73 | -0.36 | -0.63 | -0.60 | -0.53 | -0.56 | -0.34 |
| HCCCN (Cyanoacetylene)       | -0.36 | 0.36  | -0.20 | -0.48 | -0.24 | -0.53 | -0.40 | -0.44 | -0.45 | -0.30 |
| HCCF (Fluoroacetylene)       | -0.56 | 0.02  | -0.35 | -1.71 | -0.39 | -0.64 | -0.62 | -0.56 | -1.71 | -1.64 |
| HCl (Hydrogen sulfide)       | -0.52 | 0.07  | -0.33 | -0.69 | -0.36 | -0.65 | -0.60 | -0.53 | -0.59 | -0.43 |
| HCN (Hydrogen cyanide)       | -0.49 | 0.00  | -0.34 | -1.31 | -0.37 | -0.52 | -0.49 | -0.43 | -1.43 | -1.50 |
| HCO (Formyl radical)         | -0.05 | 0.69  | 0.06  | -0.06 | 0.14  | -0.06 | 0.00  | 0.03  | 0.09  | 0.25  |
| HCOOH (Formic acid)          | -0.59 | 0.01  | -0.35 | -1.35 | -0.39 | -0.68 | -0.64 | -0.57 | -1.46 | -1.54 |
| He (Helium atom)             | -2.63 | -2.05 | -2.32 | -2.63 | -2.37 | -2.64 | -2.60 | -2.49 | -2.47 | -2.26 |
| HF (Hydrogen fluoride)       | -0.64 | -0.05 | -0.44 | -0.84 | -0.45 | -0.73 | -0.69 | -0.61 | -0.65 | -0.46 |
| Li (Lithium atom)            | 0.62  | 0.93  | 0.51  | 0.52  | 0.56  | 0.40  | 0.48  | 0.51  | 0.52  | 0.40  |
| Mg (Magnesium atom)          | -0.24 | 0.30  | -0.02 | -0.20 | -0.08 | -0.33 | -0.29 | -0.22 | -0.26 | -0.24 |
| N (Nitrogen atom)            | -0.34 | 0.81  | 0.28  | -0.21 | 0.23  | -0.08 | -0.08 | -0.08 | -0.14 | -0.01 |
| N2 (Nitrogen diatomic)       | -2.32 | -1.16 | -1.64 | -1.92 | -1.45 | -1.91 | -1.86 | -1.75 | -1.70 | -2.05 |
| N2H4 (Hydrazine)             | -0.46 | 0.15  | -0.26 | -0.69 | -0.30 | -0.58 | -0.54 | -0.48 | -0.48 | -0.27 |
| N2O (Nitrous oxide)          | -2.05 | -0.53 | -0.97 | -2.03 | -1.00 | -1.48 | -1.43 | -1.35 | -1.85 | -1.56 |
| Na (Sodium atom)             | 0.54  | 0.96  | 0.55  | 0.47  | 0.58  | 0.54  | 0.57  | 0.52  | 0.56  | 0.53  |
| NaCl (Sodium Chloride)       | 0.64  | 1.19  | 0.80  | 0.37  | 0.82  | 0.57  | 0.59  | 0.65  | 0.62  | 1.01  |
| Ne (Neon atom)               | -5.32 | -4.41 | -4.93 | -5.46 | -4.90 | -5.57 | -5.43 | -5.32 | -4.89 | -4.58 |
| NF3 (Nitrogen trifluoride)   | -2.04 | -0.92 | -1.37 | -2.03 | -1.43 | -1.96 | -1.93 | -1.85 | -1.67 | -1.25 |
| NH (Imidogen)                | 0.14  | 1.29  | 0.56  | 0.22  | 0.51  | 0.29  | 0.32  | 0.32  | 0.27  | 0.24  |
| NH2 (Amino radical)          | 0.54  | 1.67  | 0.84  | 0.45  | 0.76  | 0.61  | 0.64  | 0.66  | 0.69  | 0.90  |
| NH3 (Ammonia)                | -0.57 | 0.00  | -0.38 | -0.77 | -0.41 | -0.67 | -0.65 | -0.58 | -0.60 | -0.35 |
| NO (Nitric oxide)            | -0.43 | 0.19  | -0.13 | -0.41 | -0.06 | -0.28 | -0.24 | -0.22 | -0.24 | -0.09 |
| NO2 (Nitrogen dioxide)       | 1.47  | 1.92  | 1.20  | 0.84  | 1.45  | 1.39  | 1.41  | 1.36  | 1.54  | 2.15  |
| O (Oxygen atom)              | 1.24  | 2.57  | 1.78  | 1.26  | 1.68  | 1.48  | 1.48  | 1.46  | 1.41  | 1.34  |
| O2 (Oxygen diatomic)         | -0.14 | 0.60  | -0.11 | -0.44 | 0.05  | -0.12 | -0.08 | -0.10 | -0.03 | 0.34  |
| O3 (Ozone)                   | 2.30  | 2.56  | 1.91  | 1.83  | 2.44  | 2.48  | 2.49  | 2.41  | 2.68  | 3.30  |
| OCS (Carbonyl sulfide)       | -0.86 | -0.51 | -1.00 | -1.31 | -0.70 | -1.05 | -1.00 | -0.92 | -1.20 | -0.92 |
| OH (Hydroxyl radical)        | 1.60  | 2.86  | 1.97  | 1.49  | 1.85  | 1.73  | 1.73  | 1.71  | 1.70  | 1.90  |
| P (Phosphorus atom)          | 0.61  | 1.50  | 0.88  | 0.61  | 0.96  | 0.72  | 0.82  | 0.88  | 0.86  | 0.96  |
| P2 (Phosphorus diatomic)     | 0.46  | 1.07  | 0.58  | 0.42  | 0.62  | 0.66  | 0.66  | 0.64  | 0.53  | 0.71  |
| PF3 (Phosphorus trifluoride) | -1.23 | -0.42 | -0.82 | -1.20 | -0.89 | -1.37 | -1.32 | -1.21 | -1.14 | -1.01 |
| PH3 (Phosphine)              | -0.52 | 0.04  | -0.34 | -0.73 | -0.39 | -0.64 | -0.61 | -0.55 | -0.57 | -0.32 |

|                              |       |       |       |       |       |       |       |       |       |       |
|------------------------------|-------|-------|-------|-------|-------|-------|-------|-------|-------|-------|
| S (Sulfur atom)              | 1.95  | 2.87  | 2.17  | 1.99  | 2.20  | 2.03  | 2.12  | 2.16  | 2.11  | 2.19  |
| S2 (Sulfur diatomic)         | 1.45  | 2.00  | 1.36  | 1.26  | 1.47  | 1.50  | 1.52  | 1.51  | 1.51  | 1.72  |
| Si (Silicon atom)            | 1.34  | 1.63  | 1.49  | 1.39  | 1.34  | 1.19  | 1.24  | 1.32  | 1.26  | 1.23  |
| Si2H6 (Disilane)             | -0.66 | 0.04  | -0.31 | -0.84 | -0.39 | -0.69 | -0.68 | -0.62 | -0.62 | -0.55 |
| SiF2 (Silicon difluoride)    | 0.07  | 0.75  | 0.29  | 0.05  | 0.29  | 0.08  | 0.13  | 0.17  | 0.13  | 0.24  |
| SiF4 (Silicon tetrafluoride) | -0.81 | 0.04  | -0.47 | -1.31 | -0.51 | -1.03 | -1.00 | -0.94 | -0.79 | -0.36 |
| SiH3 (Silyl)                 | 0.82  | 1.61  | 0.94  | 0.74  | 0.97  | 0.81  | 0.88  | 0.92  | 0.83  | 0.96  |
| SiH4 (Silane)                | -0.59 | -0.02 | -0.38 | -0.86 | -0.43 | -0.68 | -0.66 | -0.61 | -0.58 | -0.29 |
| SiO (Silicon monoxide)       | 0.01  | 0.66  | 0.22  | -0.02 | 0.22  | -0.01 | 0.05  | 0.11  | 0.04  | 0.13  |
| SO2 (Sulfur dioxide)         | 0.87  | 1.36  | 0.77  | 0.58  | 1.00  | 0.98  | 0.98  | 0.94  | 0.99  | 1.40  |
| MAE                          | 0.79  | 0.34  | 0.24  | 0.31  | 0.20  | 0.18  | 0.18  | 0.16  | 0.21  | 0.33  |
| MSE                          | 0.78  | 0.32  | -0.07 | 0.30  | 0.02  | 0.07  | 0.07  | 0.13  | 0.05  | 0.17  |
| RMS                          | 0.86  | 0.46  | 0.38  | 0.43  | 0.34  | 0.32  | 0.32  | 0.31  | 0.37  | 0.42  |

Table S4. Vertical electron affinities (2) [in eV] of the 121 molecules studied. The reference values are calculated by CCSD.

| Molecule                           | CCSD  | LDA   | PBE   | M06L  | B3LYP | $\omega$ B97 | $\omega$ B97X | $\omega$ B97X-D | M06-2X | M06-HF |
|------------------------------------|-------|-------|-------|-------|-------|--------------|---------------|-----------------|--------|--------|
| Al (Aluminum atom)                 | 0.38  | -0.86 | -1.26 | -1.56 | -0.92 | 0.61         | 0.57          | 0.46            | -0.44  | 0.44   |
| AlCl3 (Aluminum trichloride)       | 0.02  | -0.92 | -1.39 | -1.94 | -1.08 | -0.17        | -0.05         | -0.06           | -0.65  | 0.61   |
| Ar (Argon atom)                    | -2.81 | -4.14 | -4.59 | -4.89 | -4.31 | -2.89        | -2.81         | -2.71           | -3.40  | -2.25  |
| B (Boron atom)                     | 0.18  | -1.35 | -1.77 | -1.85 | -1.32 | 0.56         | 0.51          | 0.30            | -0.67  | 0.52   |
| BCl3 (Borane, trichloro-)          | -0.25 | -2.09 | -2.07 | -2.22 | -2.01 | 0.22         | 0.09          | -0.31           | -1.19  | 0.45   |
| Be (Beryllium atom)                | -0.38 | -1.02 | -1.31 | -1.38 | -1.14 | -0.40        | -0.31         | -0.28           | -0.91  | -0.48  |
| BF3 (Borane, trifluoro-)           | -1.04 | -1.64 | -2.05 | -1.86 | -1.84 | -1.10        | -0.95         | -0.93           | -1.45  | -0.68  |
| C (Carbon atom)                    | 1.16  | -1.38 | -1.88 | -2.16 | -1.15 | 1.36         | 1.21          | 0.83            | -0.02  | 1.81   |
| C2F4 (Tetrafluoroethylene)         | -1.21 | -1.71 | -1.80 | -2.77 | -1.94 | -1.28        | -1.24         | -1.17           | -1.63  | -1.58  |
| C2H2 (Acetylene)                   | -2.01 | -0.95 | -1.25 | -1.30 | -1.16 | -0.67        | -0.65         | -0.61           | -1.12  | -2.00  |
| C2H2O2 (Ethanediol)                | 0.63  | -1.63 | -2.20 | -2.36 | -1.37 | 1.04         | 0.89          | 0.48            | -0.21  | 1.63   |
| C2H4 (Ethylene)                    | -1.82 | -1.13 | -1.45 | -1.51 | -1.36 | -0.70        | -0.68         | -0.83           | -1.27  | -1.68  |
| C2H4O (Ethylene oxide)             | -0.87 | -1.10 | -1.42 | -1.56 | -1.30 | -0.63        | -0.61         | -0.56           | -1.24  | -0.95  |
| C2H4S (Thiirane)                   | -0.79 | -1.16 | -1.44 | -1.60 | -1.33 | -0.62        | -0.59         | -0.54           | -1.19  | -0.88  |
| C2H5N (Aziridine)                  | -0.56 | -1.11 | -1.43 | -1.57 | -1.31 | -0.59        | -0.55         | -0.51           | -1.11  | -0.41  |
| C2H6 (Ethane)                      | -0.63 | -1.10 | -1.44 | -1.65 | -1.32 | -0.68        | -0.66         | -0.62           | -1.14  | -0.45  |
| C2HF3 (Trifluoroethylene)          | -0.56 | -1.12 | -1.47 | -2.89 | -1.33 | -0.60        | -0.57         | -0.53           | -2.30  | -1.69  |
| C2N2 (Cyanogen)                    | -0.22 | -2.54 | -3.09 | -3.26 | -2.24 | 0.17         | 0.01          | -0.39           | -1.17  | 0.72   |
| C3H4 (Cyclopropene)                | -1.76 | -1.05 | -1.37 | -2.86 | -1.24 | -0.67        | -0.65         | -0.60           | -1.17  | -1.56  |
| C3H6 (Cyclopropane)                | -0.66 | -1.08 | -1.41 | -1.61 | -1.31 | -0.72        | -0.71         | -0.66           | -1.15  | -0.46  |
| C3H8 (Propane)                     | -0.61 | -1.01 | -1.35 | -1.52 | -1.25 | -0.68        | -0.66         | -0.62           | -1.09  | -0.33  |
| C3O2 (Carbon suboxide)             | -0.66 | -3.43 | -3.86 | -4.17 | -3.00 | -0.95        | -0.91         | -0.85           | -1.33  | 0.37   |
| C4H2 (Diacetylene)                 | -1.24 | -2.15 | -2.44 | -2.58 | -2.19 | -0.62        | -0.60         | -1.13           | -1.81  | -0.79  |
| C4H4O (Furan)                      | -0.74 | -0.93 | -1.26 | -1.48 | -1.17 | -0.62        | -0.59         | -0.55           | -2.13  | -1.68  |
| C4H6 (Cyclobutene)                 | -2.30 | -1.00 | -1.33 | -1.71 | -1.23 | -0.67        | -0.65         | -0.61           | -1.58  | -2.03  |
| C4N2 (2-Butynedinitrile)           | 0.64  | -1.14 | -1.74 | -1.87 | -1.03 | 1.19         | 1.05          | 0.70            | -0.09  | 1.57   |
| CCl4 (Carbon tetrachloride)        | -0.39 | -1.49 | -1.89 | -2.52 | -1.52 | -0.16        | -0.21         | -0.34           | -1.08  | -0.10  |
| CF2Cl2 (Difluorodichloromethane)   | -0.89 | -1.67 | -2.02 | -2.29 | -1.80 | -1.07        | -0.99         | -0.93           | -1.51  | -0.77  |
| CF2O (Carbonic difluoride)         | -2.39 | -1.86 | -2.28 | -2.65 | -2.06 | -1.19        | -1.13         | -1.09           | -2.16  | -1.70  |
| CF3Br (Bromotrifluoromethane)      | -0.79 | -1.87 | -2.17 | -2.58 | -2.01 | -0.84        | -0.79         | -0.80           | -1.65  | -0.35  |
| CF3Cl (Methane, chlorotrifluoro-)  | -1.05 | -1.77 | -2.14 | -2.60 | -1.96 | -1.11        | -1.06         | -1.05           | -1.70  | -0.89  |
| CF4 (Carbon tetrafluoride)         | -1.34 | -1.98 | -2.39 | -2.85 | -2.22 | -1.47        | -1.44         | -1.41           | -1.94  | -1.22  |
| CFCl3 (Trichloromonofluoromethane) | -0.62 | -1.62 | -2.00 | -2.44 | -1.69 | -0.53        | -0.56         | -0.66           | -1.37  | -0.29  |
| CH2CCH2 (Allene)                   | -0.57 | -0.99 | -1.32 | -1.69 | -1.22 | -0.63        | -0.61         | -0.58           | -1.43  | -0.39  |
| CH2CCl2 (Ethene, 1,1-dichloro-)    | -0.97 | -2.20 | -1.43 | -2.76 | -1.29 | -0.59        | -0.56         | -0.52           | -1.11  | -0.44  |

|                                |       |       |       |       |       |       |       |       |       |       |
|--------------------------------|-------|-------|-------|-------|-------|-------|-------|-------|-------|-------|
| CH2CF2 (Ethene, 1,1-difluoro-) | -0.97 | -1.09 | -1.43 | -1.55 | -1.31 | -0.61 | -0.59 | -0.55 | -1.13 | -1.73 |
| CH2CHCHO (Acrolein)            | -0.46 | -2.20 | -2.67 | -3.00 | -2.08 | 0.15  | 0.00  | -0.37 | -1.13 | 0.40  |
| CH2CHCl (Ethene, chloro-)      | -0.86 | -2.47 | -1.44 | -2.92 | -1.32 | -0.59 | -0.57 | -0.53 | -2.12 | -1.12 |
| CH2CHF (Ethene, fluoro-)       | -0.87 | -1.13 | -1.45 | -3.02 | -2.70 | -0.63 | -0.61 | -0.57 | -2.46 | -1.68 |
| CH2Cl2 (Methylene chloride)    | -0.51 | -1.27 | -1.60 | -1.82 | -1.41 | -0.55 | -0.52 | -0.47 | -1.11 | -0.47 |
| CH2CO (Ketene)                 | -0.52 | -1.46 | -1.71 | -1.83 | -1.27 | -0.57 | -0.54 | -0.50 | -1.36 | -0.89 |
| CH2F2 (Methane, difluoro-)     | -0.59 | -1.18 | -1.51 | -1.72 | -1.37 | -0.60 | -0.58 | -0.54 | -1.22 | -0.57 |
| CH3 (Methyl radical)           | -0.23 | -1.89 | -2.37 | -2.31 | -1.77 | 0.46  | 0.33  | 0.03  | -0.90 | 0.57  |
| CH3CCCH3 (2-Butyne)            | -0.68 | -0.89 | -1.24 | -1.27 | -1.60 | -0.62 | -0.61 | -0.57 | -1.04 | -0.56 |
| CH3CCH (Propyne)               | -0.55 | -1.02 | -1.32 | -1.63 | -1.13 | -0.57 | -0.55 | -0.50 | -0.92 | -0.59 |
| CH3CH2Cl (Ethyl chloride)      | -0.52 | -1.08 | -1.43 | -1.74 | -1.30 | -0.56 | -0.52 | -0.49 | -1.07 | -0.36 |
| CH3CH2OH (Ethanol)             | -0.54 | -1.05 | -1.39 | -1.54 | -1.26 | -0.58 | -0.55 | -0.50 | -1.06 | -0.34 |
| CH3Cl (Methyl chloride)        | -0.52 | -1.17 | -1.51 | -1.50 | -1.36 | -0.56 | -0.52 | -0.47 | -1.11 | -1.33 |
| CH3COCl (Acetyl Chloride)      | -0.91 | -1.43 | -1.70 | -1.87 | -1.22 | -0.48 | -0.45 | -0.40 | -1.34 | -0.01 |
| CH3F (Methyl fluoride)         | -0.59 | -1.16 | -1.49 | -1.53 | -1.36 | -0.60 | -0.58 | -0.54 | -1.19 | -0.55 |
| CH3NHCH3 (Dimethylamine)       | -0.56 | -1.01 | -1.34 | -1.47 | -1.23 | -0.63 | -0.61 | -0.56 | -1.03 | -0.11 |
| CH3NO2 (Methane, nitro-)       | -0.28 | -1.45 | -1.71 | -1.88 | -1.53 | -0.42 | -0.39 | -0.35 | -1.12 | 1.43  |
| CH3OCH3 (Dimethyl ether)       | -0.59 | -1.02 | -1.35 | -1.50 | -1.25 | -0.65 | -0.62 | -0.57 | -1.07 | -0.38 |
| CH3OH (Methyl alcohol)         | -0.55 | -1.13 | -1.46 | -1.49 | -1.33 | -0.59 | -0.56 | -0.51 | -1.10 | -0.49 |
| CH3SH (Methanethiol)           | -0.52 | -1.09 | -1.44 | -1.60 | -1.30 | -0.58 | -0.55 | -0.50 | -1.03 | -0.44 |
| CH3SiH3 (Methyl silane)        | -0.53 | -1.01 | -1.26 | -1.38 | -1.16 | -0.60 | -0.58 | -0.53 | -1.00 | -0.37 |
| CH4 (Methane)                  | -0.63 | -1.17 | -1.49 | -1.76 | -1.37 | -0.63 | -0.61 | -0.58 | -1.16 | -0.59 |
| CHCl3 (Chloroform)             | -0.55 | -1.49 | -1.87 | -2.06 | -1.63 | -0.58 | -0.54 | -0.50 | -1.24 | -0.51 |
| CHF3 (Methane, trifluoro-)     | -0.61 | -1.26 | -1.59 | -1.77 | -1.45 | -0.62 | -0.60 | -0.57 | -1.19 | -0.57 |
| CHONH2 (Formamide)             | -0.36 | -1.07 | -1.41 | -2.77 | -1.24 | -0.36 | -0.33 | -0.29 | -2.27 | -1.73 |
| Cl (Chlorine atom)             | 3.51  | 0.03  | -0.24 | -0.15 | 0.79  | 3.70  | 3.45  | 2.92  | 2.23  | 4.27  |
| Cl2 (Chlorine diatomic)        | 0.64  | -1.51 | -1.98 | -2.38 | -1.37 | 0.83  | 0.65  | 0.28  | -0.45 | 1.27  |
| ClF (Chlorine monofluoride)    | 0.34  | -2.14 | -2.63 | -3.02 | -1.90 | 0.41  | 0.24  | -0.17 | -0.89 | 0.95  |
| ClF3 (Chlorine trifluoride)    | 1.19  | -1.90 | -2.40 | -2.71 | -1.40 | 1.23  | 1.01  | 0.50  | -0.01 | 2.47  |
| ClO (Monochlorine monoxide)    | 2.04  | -1.50 | -1.82 | -1.83 | -0.63 | 2.20  | 1.98  | 1.45  | 1.03  | 3.56  |
| CO (Carbon monoxide)           | -1.49 | -2.46 | -2.74 | -2.83 | -2.49 | -1.45 | -1.41 | -1.38 | -2.19 | -1.44 |
| CO2 (Carbon dioxide)           | -0.84 | -1.75 | -2.15 | -2.58 | -1.93 | -1.02 | -0.96 | -0.91 | -1.50 | -0.77 |
| CS (Carbon monosulfide)        | -0.08 | -2.41 | -2.82 | -3.10 | -2.12 | -1.04 | -1.00 | -0.30 | -1.18 | 0.67  |
| CS2 (Carbon disulfide)         | 0.07  | -2.01 | -2.41 | -2.85 | -1.79 | -1.18 | 0.31  | -0.07 | -0.93 | 0.86  |
| F (Fluorine atom)              | 3.21  | -0.88 | -1.53 | -1.54 | -0.03 | 3.08  | 2.84  | 2.20  | 2.06  | 5.19  |
| F2 (Fluorine diatomic)         | 0.42  | -3.04 | -3.50 | -3.62 | -2.48 | 0.12  | -0.05 | -0.56 | -0.67 | 2.46  |
| F2O (Difluorine monoxide)      | -0.38 | -3.12 | -3.56 | -4.09 | -2.75 | -0.38 | -0.55 | -1.02 | -1.50 | 1.18  |
| FCN (Cyanogen fluoride)        | -0.69 | -1.72 | -2.15 | -2.33 | -1.87 | -0.80 | -0.73 | -0.72 | -1.40 | -0.59 |



|                              |       |       |       |       |       |       |       |       |       |       |
|------------------------------|-------|-------|-------|-------|-------|-------|-------|-------|-------|-------|
| H (Hydrogen atom)            | 0.74  | -1.23 | -1.71 | -1.32 | -1.00 | 1.40  | 1.32  | 0.99  | -0.14 | 1.42  |
| H2CO (Formaldehyde)          | -0.55 | -2.35 | -2.64 | -2.73 | -1.36 | -0.96 | -0.52 | -1.11 | -1.81 | -0.59 |
| H2CS (Thioformaldehyde)      | 0.26  | -2.08 | -2.52 | -2.78 | -1.79 | 0.66  | 0.48  | 0.06  | -0.79 | 0.79  |
| H2O (Water)                  | -0.58 | -1.40 | -1.75 | -1.85 | -1.57 | -0.64 | -0.59 | -0.54 | -1.26 | -0.75 |
| H2O2 (Hydrogen peroxide)     | -0.92 | -1.36 | -1.72 | -1.87 | -1.57 | -0.74 | -0.69 | -0.64 | -1.39 | -1.12 |
| H2S (Hydrogen sulfide)       | -0.50 | -1.17 | -1.51 | -1.72 | -1.37 | -0.58 | -0.54 | -0.48 | -1.06 | -0.56 |
| HCCCN (Cyanoacetylene)       | -0.36 | -2.04 | -2.34 | -2.45 | -2.04 | -0.36 | -0.31 | -0.73 | -1.49 | -0.08 |
| HCCF (Fluoroacetylene)       | -0.56 | -1.07 | -1.40 | -2.90 | -1.28 | -0.59 | -0.57 | -0.52 | -2.38 | -1.85 |
| HCl (Hydrogen sulfide)       | -0.52 | -1.32 | -1.67 | -1.88 | -1.49 | -0.60 | -0.54 | -0.49 | -1.25 | -0.71 |
| HCN (Hydrogen cyanide)       | -0.49 | -1.26 | -1.58 | -2.73 | -1.42 | -0.46 | -0.42 | -0.40 | -2.19 | -1.73 |
| HCO (Formyl radical)         | -0.05 | -2.22 | -2.60 | -2.59 | -1.98 | 0.30  | 0.19  | -0.15 | -0.94 | 0.91  |
| HCOOH (Formic acid)          | -0.59 | -1.12 | -1.43 | -2.71 | -1.31 | -0.61 | -0.57 | -0.53 | -2.18 | -1.48 |
| He (Helium atom)             | -2.63 | -3.93 | -4.19 | -4.33 | -3.92 | -2.63 | -2.56 | -2.52 | -3.65 | -3.02 |
| HF (Hydrogen fluoride)       | -0.64 | -1.64 | -2.00 | -2.11 | -1.77 | -0.69 | -0.64 | -0.61 | -1.45 | -0.86 |
| Li (Lithium atom)            | 0.62  | -0.51 | -0.86 | -0.94 | -0.57 | 0.69  | 0.72  | 0.70  | -0.10 | 0.47  |
| Mg (Magnesium atom)          | -0.24 | -0.66 | -0.92 | -0.93 | -0.80 | -0.32 | -0.27 | -0.20 | -0.71 | -0.39 |
| N (Nitrogen atom)            | -0.34 | -2.67 | -3.09 | -3.14 | -2.30 | 0.18  | 0.00  | -0.45 | -1.43 | 0.16  |
| N2 (Nitrogen diatomic)       | -2.32 | -3.74 | -3.98 | -4.01 | -2.45 | -1.86 | -1.81 | -1.71 | -2.30 | -1.55 |
| N2H4 (Hydrazine)             | -0.46 | -1.20 | -1.57 | -1.80 | -1.39 | -0.51 | -0.47 | -0.44 | -1.11 | -0.38 |
| N2O (Nitrous oxide)          | -2.05 | -2.03 | -2.40 | -4.02 | -2.20 | -1.42 | -1.35 | -1.29 | -2.83 | -0.87 |
| Na (Sodium atom)             | 0.54  | -0.49 | -0.83 | -0.83 | -0.55 | 0.69  | 0.69  | 0.66  | -0.09 | 0.45  |
| NaCl (Sodium Chloride)       | 0.64  | -0.46 | -0.80 | -0.88 | -0.51 | 0.63  | 0.66  | 0.67  | -0.12 | 0.75  |
| Ne (Neon atom)               | -5.32 | -7.28 | -7.68 | -7.81 | -7.27 | -5.43 | -5.39 | -5.53 | -6.25 | -5.03 |
| NF3 (Nitrogen trifluoride)   | -2.04 | -2.59 | -2.98 | -3.37 | -2.71 | -1.89 | -1.84 | -1.79 | -2.30 | -1.59 |
| NH (Imidogen)                | 0.14  | -2.27 | -2.79 | -2.84 | -1.94 | 0.68  | 0.50  | 0.03  | -0.78 | 1.29  |
| NH2 (Amino radical)          | 0.54  | -1.89 | -2.47 | -2.49 | -1.57 | 1.14  | 0.94  | 0.47  | -0.26 | 1.86  |
| NH3 (Ammonia)                | -0.57 | -1.27 | -1.60 | -1.83 | -1.45 | -0.62 | -0.59 | -0.53 | -1.17 | -0.65 |
| NO (Nitric oxide)            | -0.43 | -3.43 | -3.71 | -3.86 | -2.85 | -0.32 | -0.51 | -0.95 | -1.55 | 0.98  |
| NO2 (Nitrogen dioxide)       | 1.47  | -1.59 | -2.16 | -2.58 | -1.13 | 1.55  | 1.36  | 0.84  | 0.37  | 3.16  |
| O (Oxygen atom)              | 1.24  | -1.93 | -2.47 | -2.63 | -1.32 | 1.60  | 1.38  | 0.80  | 0.26  | 2.82  |
| O2 (Oxygen diatomic)         | -0.14 | -3.62 | -4.16 | -4.48 | -2.97 | -0.19 | -0.40 | -0.95 | -1.34 | 1.74  |
| O3 (Ozone)                   | 2.30  | -1.60 | -2.15 | -2.19 | -0.57 | 2.40  | 2.17  | 1.56  | 1.44  | 4.24  |
| OCS (Carbonyl sulfide)       | -0.86 | -2.75 | -3.02 | -3.19 | -1.80 | -0.93 | -0.89 | -0.86 | -2.18 | -0.41 |
| OH (Hydroxyl radical)        | 1.60  | -1.51 | -2.13 | -2.18 | -0.94 | 2.03  | 1.80  | 1.23  | 0.76  | 3.46  |
| P (Phosphorus atom)          | 0.61  | -1.30 | -1.77 | -1.97 | -1.11 | 1.02  | 0.95  | 0.67  | -0.29 | 1.21  |
| P2 (Phosphorus diatomic)     | 0.46  | -1.64 | -2.04 | -2.28 | -1.43 | 0.90  | 0.73  | 0.37  | -0.58 | 1.03  |
| PF3 (Phosphorus trifluoride) | -1.23 | -1.86 | -2.17 | -2.38 | -2.00 | -1.33 | -1.27 | -1.20 | -1.80 | -1.17 |
| PH3 (Phosphine)              | -0.52 | -1.09 | -1.43 | -1.71 | -1.31 | -0.60 | -0.56 | -0.51 | -1.09 | -0.55 |

|                              |       |       |       |       |       |       |       |       |       |       |
|------------------------------|-------|-------|-------|-------|-------|-------|-------|-------|-------|-------|
| S (Sulfur atom)              | 1.95  | -0.58 | -1.11 | -1.22 | -0.27 | 2.34  | 2.17  | 1.74  | 0.89  | 2.77  |
| S2 (Sulfur diatomic)         | 1.45  | -1.08 | -1.62 | -1.75 | -0.79 | 1.75  | 1.56  | 1.15  | 0.34  | 2.25  |
| Si (Silicon atom)            | 1.34  | -0.98 | -1.13 | -1.28 | -0.63 | 1.54  | 1.41  | 1.13  | 0.18  | 1.48  |
| Si2H6 (Disilane)             | -0.66 | -0.89 | -1.20 | -1.72 | -1.12 | -0.65 | -0.63 | -0.58 | -1.06 | -0.81 |
| SiF2 (Silicon difluoride)    | 0.07  | -1.57 | -1.93 | -2.06 | -1.54 | 0.24  | 0.15  | -0.08 | -0.94 | 0.22  |
| SiF4 (Silicon tetrafluoride) | -0.81 | -1.52 | -1.98 | -2.47 | -1.75 | -1.00 | -0.94 | -0.90 | -1.28 | -0.48 |
| SiH3 (Silyl)                 | 0.82  | -0.97 | -1.45 | -1.63 | -0.89 | 1.21  | 1.12  | 0.86  | -0.05 | 1.43  |
| SiH4 (Silane)                | -0.59 | -1.05 | -1.37 | -1.78 | -1.26 | -0.64 | -0.61 | -0.57 | -1.15 | -0.66 |
| SiO (Silicon monoxide)       | 0.01  | -1.54 | -1.90 | -1.98 | -1.52 | 0.12  | 0.06  | -0.13 | -0.97 | 0.05  |
| SO2 (Sulfur dioxide)         | 0.87  | -2.12 | -2.58 | -2.84 | -1.62 | 1.04  | 0.82  | 0.33  | -0.34 | 2.02  |
| MAE                          | 1.31  | 1.67  | 1.95  | 1.28  | 0.24  | 0.20  | 0.24  | 0.80  | 0.55  |       |
| MSE                          | -1.27 | -1.62 | -1.92 | -1.22 | 0.13  | 0.12  | 0.00  | -0.75 | 0.34  |       |
| RMS                          | 1.60  | 1.97  | 2.20  | 1.47  | 0.39  | 0.35  | 0.39  | 0.87  | 0.76  |       |

Table S5. Vertical electron affinities (3) [in eV] of the 121 molecules studied. The reference values are calculated by CCSD.

| Molecule                           | CCSD  | LDA   | PBE   | M06L  | B3LYP | $\omega$ B97 | $\omega$ B97X | $\omega$ B97X-D | M06-2X | M06-HF |
|------------------------------------|-------|-------|-------|-------|-------|--------------|---------------|-----------------|--------|--------|
| Al (Aluminum atom)                 | 0.38  | 3.32  | 2.76  | 2.29  | 2.11  | -0.02        | 0.11          | 0.38            | 1.27   | 3.65   |
| AlCl3 (Aluminum trichloride)       | 0.02  | 2.92  | 2.22  | 1.55  | 1.70  | -0.41        | -0.32         | -0.13           | 1.00   | 0.79   |
| Ar (Argon atom)                    | -2.81 | -0.31 | -0.65 | -1.79 | -0.92 | -3.22        | -3.31         | -3.07           | -1.72  | -1.57  |
| B (Boron atom)                     | 0.18  | 4.36  | 3.62  | 2.74  | 2.68  | -0.14        | 0.12          | 0.56            | 1.41   | 3.91   |
| BCl3 (Borane, trichloro-)          | -0.25 | 3.45  | 2.72  | 2.37  | 1.98  | -0.69        | -0.45         | -0.04           | 0.92   | 0.32   |
| Be (Beryllium atom)                | -0.38 | 2.52  | 2.02  | 1.68  | 1.43  | -0.50        | -0.46         | -0.24           | 0.53   | 0.27   |
| BF3 (Borane, trifluoro-)           | -1.04 | 1.21  | 0.78  | 0.33  | 0.51  | -1.19        | -1.29         | -1.12           | 0.15   | 0.21   |
| C (Carbon atom)                    | 1.16  | 6.49  | 5.58  | 4.77  | 4.28  | 0.99         | 1.37          | 1.95            | 2.70   | 3.43   |
| C2F4 (Tetrafluoroethylene)         | -1.21 | 1.15  | 0.58  | 0.12  | 0.30  | -1.45        | -1.56         | -1.39           | -0.04  | 0.03   |
| C2H2 (Acetylene)                   | -2.01 | 1.04  | 0.41  | -0.01 | 0.05  | -0.85        | -0.92         | -0.85           | -0.05  | 0.18   |
| C2H2O2 (Ethanediol)                | 0.63  | 5.21  | 4.44  | 4.04  | 3.59  | 0.67         | 0.94          | 1.40            | 2.18   | 0.74   |
| C2H4 (Ethylene)                    | -1.82 | 1.79  | 1.12  | 0.73  | 0.37  | -0.90        | -0.99         | -0.87           | 0.00   | 0.19   |
| C2H4O (Ethylene oxide)             | -0.87 | 0.66  | 0.40  | 0.19  | 0.24  | -0.84        | -0.93         | -0.80           | 0.09   | 0.26   |
| C2H4S (Thiirane)                   | -0.79 | 1.54  | 0.95  | 0.61  | 0.36  | -0.86        | -0.95         | -0.81           | 0.11   | 0.27   |
| C2H5N (Aziridine)                  | -0.56 | 0.88  | 0.55  | 0.27  | 0.33  | -0.81        | -0.90         | -0.77           | 0.14   | 0.28   |
| C2H6 (Ethane)                      | -0.63 | 0.71  | 0.42  | 0.15  | 0.25  | -0.88        | -0.96         | -0.83           | 0.07   | 0.22   |
| C2HF3 (Trifluoroethylene)          | -0.56 | 1.54  | 0.77  | 0.35  | 0.37  | -0.81        | -0.89         | -0.77           | 0.16   | 0.32   |
| C2N2 (Cyanogen)                    | -0.22 | 4.29  | 3.55  | 3.15  | 2.77  | 0.00         | 0.25          | 0.69            | 1.45   | 0.17   |
| C3H4 (Cyclopropene)                | -1.76 | 1.79  | 1.11  | 0.67  | 0.35  | -0.87        | -0.96         | -0.84           | -0.01  | 0.18   |
| C3H6 (Cyclopropane)                | -0.66 | 0.62  | 0.33  | 0.09  | 0.16  | -0.92        | -1.00         | -0.87           | 0.02   | 0.18   |
| C3H8 (Propane)                     | -0.61 | 0.78  | 0.47  | 0.16  | 0.27  | -0.88        | -0.96         | -0.83           | 0.10   | 0.24   |
| C3O2 (Carbon suboxide)             | -0.66 | 3.31  | 2.55  | 2.18  | 1.91  | -0.70        | -0.47         | -0.08           | 0.78   | 0.23   |
| C4H2 (Diacetylene)                 | -1.24 | 2.53  | 1.84  | 1.45  | 1.14  | -0.76        | -0.82         | -0.75           | 0.09   | 0.25   |
| C4H4O (Furan)                      | -0.74 | 1.56  | 0.88  | 0.55  | 0.20  | -0.83        | -0.91         | -0.79           | 0.07   | 0.26   |
| C4H6 (Cyclobutene)                 | -2.30 | 1.32  | 0.66  | 0.28  | 0.20  | -0.88        | -0.96         | -0.84           | 0.06   | 0.23   |
| C4N2 (2-Butynedinitrile)           | 0.64  | 4.72  | 3.97  | 3.62  | 3.29  | 0.74         | 0.97          | 1.35            | 2.15   | 0.99   |
| CCl4 (Carbon tetrachloride)        | -0.39 | 3.35  | 2.72  | 2.54  | 1.93  | -0.77        | -0.57         | -0.15           | 0.67   | 0.16   |
| CF2Cl2 (Difluorodichloromethane)   | -0.89 | 2.60  | 1.92  | 1.61  | 1.18  | -1.30        | -1.26         | -0.90           | 0.06   | 0.06   |
| CF2O (Carbonic difluoride)         | -2.39 | 2.62  | 1.77  | 1.21  | 0.92  | -1.41        | -1.50         | -1.30           | 0.00   | 0.06   |
| CF3Br (Bromotrifluoromethane)      | -0.79 | 2.73  | 2.02  | 1.50  | 1.38  | -1.15        | -1.06         | -0.71           | 0.29   | 0.07   |
| CF3Cl (Methane, chlorotrifluoro-)  | -1.05 | 1.98  | 1.27  | 0.83  | 0.58  | -1.45        | -1.51         | -1.29           | -0.16  | -0.01  |
| CF4 (Carbon tetrafluoride)         | -1.34 | 0.48  | 0.19  | -0.12 | -0.04 | -1.73        | -1.86         | -1.66           | -0.30  | -0.18  |
| CFCl3 (Trichloromonofluoromethane) | -0.62 | 3.10  | 2.45  | 2.22  | 1.68  | -1.01        | -0.83         | -0.41           | 0.45   | 0.11   |
| CH2CCH2 (Allene)                   | -0.57 | 1.49  | 0.86  | 0.50  | 0.26  | -0.83        | -0.92         | -0.79           | 0.09   | 0.25   |
| CH2CCl2 (Ethene, 1,1-dichloro-)    | -0.97 | 2.37  | 1.69  | 1.36  | 1.00  | -0.85        | -0.94         | -0.81           | 0.12   | 0.31   |

|                                |       |       |      |      |      |       |       |       |       |       |
|--------------------------------|-------|-------|------|------|------|-------|-------|-------|-------|-------|
| CH2CF2 (Ethene, 1,1-difluoro-) | -0.97 | 1.47  | 0.76 | 0.30 | 0.31 | -0.82 | -0.91 | -0.79 | 0.12  | 0.29  |
| CH2CHCHO (Acrolein)            | -0.46 | 3.80  | 3.07 | 2.72 | 2.27 | -0.41 | -0.19 | 0.21  | 1.08  | 0.39  |
| CH2CHCl (Ethene, chloro-)      | -0.86 | 2.13  | 1.45 | 1.10 | 0.72 | -0.84 | -0.93 | -0.80 | 0.08  | 0.28  |
| CH2CHF (Ethene, fluoro-)       | -0.87 | 1.72  | 1.03 | 0.66 | 0.32 | -0.85 | -0.94 | -0.82 | 0.05  | 0.26  |
| CH2Cl2 (Methylene chloride)    | -0.51 | 2.04  | 1.43 | 1.09 | 0.78 | -0.82 | -0.89 | -0.74 | 0.24  | 0.35  |
| CH2CO (Ketene)                 | -0.52 | 2.84  | 2.14 | 1.70 | 1.29 | -0.78 | -0.86 | -0.73 | 0.17  | 0.34  |
| CH2F2 (Methane, difluoro-)     | -0.59 | 0.67  | 0.41 | 0.26 | 0.27 | -0.80 | -0.89 | -0.77 | 0.12  | 0.30  |
| CH3 (Methyl radical)           | -0.23 | 4.07  | 2.95 | 2.25 | 2.19 | -0.58 | -0.36 | 0.00  | 1.23  | 3.04  |
| CH3CCCH3 (2-Butyne)            | -0.68 | 0.83  | 0.54 | 0.24 | 0.35 | -0.81 | -0.89 | -0.76 | 0.15  | 0.30  |
| CH3CCH (Propyne)               | -0.55 | 0.78  | 0.50 | 0.23 | 0.33 | -0.80 | -0.88 | -0.76 | 0.13  | 0.28  |
| CH3CH2Cl (Ethyl chloride)      | -0.52 | 1.14  | 0.68 | 0.34 | 0.40 | -0.80 | -0.88 | -0.75 | 0.19  | 0.33  |
| CH3CH2OH (Ethanol)             | -0.54 | 1.00  | 0.66 | 0.33 | 0.42 | -0.80 | -0.88 | -0.75 | 0.19  | 0.31  |
| CH3Cl (Methyl chloride)        | -0.52 | 1.35  | 0.88 | 0.52 | 0.51 | -0.78 | -0.86 | -0.72 | 0.20  | 0.33  |
| CH3COCl (Acetyl Chloride)      | -0.91 | 3.04  | 2.33 | 1.91 | 1.49 | -0.73 | -0.80 | -0.63 | 0.29  | 0.44  |
| CH3F (Methyl fluoride)         | -0.59 | 0.66  | 0.42 | 0.23 | 0.28 | -0.80 | -0.89 | -0.77 | 0.11  | 0.28  |
| CH3NHCH3 (Dimethylamine)       | -0.56 | 0.89  | 0.56 | 0.24 | 0.33 | -0.83 | -0.91 | -0.78 | 0.14  | 0.28  |
| CH3NO2 (Methane, nitro-)       | -0.28 | 3.92  | 3.17 | 2.84 | 2.42 | -0.45 | -0.22 | 0.22  | 0.97  | 0.50  |
| CH3OCH3 (Dimethyl ether)       | -0.59 | 0.82  | 0.50 | 0.21 | 0.31 | -0.84 | -0.93 | -0.79 | 0.12  | 0.27  |
| CH3OH (Methyl alcohol)         | -0.55 | 1.01  | 0.67 | 0.35 | 0.43 | -0.79 | -0.87 | -0.74 | 0.19  | 0.31  |
| CH3SH (Methanethiol)           | -0.52 | 1.26  | 0.84 | 0.45 | 0.53 | -0.80 | -0.88 | -0.73 | 0.22  | 0.34  |
| CH3SiH3 (Methyl silane)        | -0.53 | 1.07  | 0.67 | 0.27 | 0.39 | -0.78 | -0.85 | -0.73 | 0.15  | 0.30  |
| CH4 (Methane)                  | -0.63 | 0.61  | 0.37 | 0.14 | 0.24 | -0.85 | -0.93 | -0.80 | 0.05  | 0.21  |
| CHCl3 (Chloroform)             | -0.55 | 2.66  | 2.03 | 1.75 | 1.27 | -0.89 | -0.94 | -0.72 | 0.25  | 0.32  |
| CHF3 (Methane, trifluoro-)     | -0.61 | 0.67  | 0.40 | 0.23 | 0.26 | -0.83 | -0.92 | -0.80 | 0.10  | 0.27  |
| CHONH2 (Formamide)             | -0.36 | 1.51  | 0.82 | 0.49 | 0.61 | -0.61 | -0.70 | -0.56 | 0.37  | 0.52  |
| Cl (Chlorine atom)             | 3.51  | 8.11  | 7.73 | 7.32 | 6.76 | 3.64  | 4.00  | 4.56  | 5.09  | 3.31  |
| Cl2 (Chlorine diatomic)        | 0.64  | 4.91  | 4.22 | 3.96 | 3.41 | 0.61  | 0.85  | 1.31  | 1.98  | 0.59  |
| ClF (Chlorine monofluoride)    | 0.34  | 5.16  | 4.43 | 4.00 | 3.48 | 0.51  | 0.74  | 1.22  | 1.85  | 0.45  |
| ClF3 (Chlorine trifluoride)    | 1.19  | 5.62  | 4.84 | 4.52 | 4.11 | 1.14  | 1.38  | 1.84  | 2.54  | 1.04  |
| ClO (Monochlorine monoxide)    | 2.04  | 6.34  | 5.95 | 5.57 | 4.95 | 1.99  | 2.23  | 2.73  | 3.51  | 1.76  |
| CO (Carbon monoxide)           | -1.49 | 2.72  | 2.01 | 1.54 | 1.13 | -1.57 | -1.44 | -1.04 | -0.22 | -0.38 |
| CO2 (Carbon dioxide)           | -0.84 | 1.33  | 0.90 | 0.33 | 0.60 | -1.21 | -1.27 | -1.08 | 0.13  | 0.20  |
| CS (Carbon monosulfide)        | -0.08 | 4.06  | 3.40 | 3.12 | 2.62 | -0.11 | 0.12  | 0.55  | 1.33  | 0.05  |
| CS2 (Carbon disulfide)         | 0.07  | 3.46  | 2.83 | 2.60 | 2.23 | -0.10 | 0.06  | 0.38  | 1.19  | 0.22  |
| F (Fluorine atom)              | 3.21  | 10.80 | 9.30 | 7.66 | 7.55 | 4.05  | 4.22  | 4.80  | 4.74  | 2.21  |
| F2 (Fluorine diatomic)         | 0.42  | 6.70  | 5.81 | 5.08 | 4.52 | 1.27  | 1.47  | 2.00  | 2.22  | 0.13  |
| F2O (Difluorine monoxide)      | -0.38 | 5.13  | 4.27 | 3.62 | 3.19 | -0.06 | 0.18  | 0.70  | 1.11  | -0.50 |
| FCN (Cyanogen fluoride)        | -0.69 | 2.07  | 1.53 | 0.82 | 1.05 | -1.04 | -1.07 | -0.84 | 0.35  | 0.31  |

|                              |       |       |       |       |       |       |       |       |       |       |
|------------------------------|-------|-------|-------|-------|-------|-------|-------|-------|-------|-------|
| H (Hydrogen atom)            | 0.74  | 2.55  | 0.70  | 95.09 | 0.04  | 1.61  | 1.49  | 1.45  | 15.29 | 52.59 |
| H2CO (Formaldehyde)          | -0.55 | 3.41  | 2.69  | 2.25  | 1.78  | -0.77 | -0.85 | -0.44 | 0.43  | 0.32  |
| H2CS (Thioformaldehyde)      | 0.26  | 4.28  | 3.62  | 3.39  | 2.85  | 0.20  | 0.41  | 0.81  | 1.67  | 0.39  |
| H2O (Water)                  | -0.58 | 1.24  | 0.93  | 0.49  | 0.68  | -0.84 | -0.92 | -0.75 | 0.28  | 0.38  |
| H2O2 (Hydrogen peroxide)     | -0.92 | 2.40  | 1.68  | 0.96  | 0.73  | -0.92 | -1.02 | -0.85 | 0.21  | 0.32  |
| H2S (Hydrogen sulfide)       | -0.50 | 1.21  | 0.84  | 0.36  | 0.58  | -0.78 | -0.84 | -0.70 | 0.22  | 0.37  |
| HCCCN (Cyanoacetylene)       | -0.36 | 3.39  | 2.67  | 2.29  | 1.93  | -0.59 | -0.47 | -0.08 | 0.75  | 0.46  |
| HCCF (Fluoroacetylene)       | -0.56 | 1.13  | 0.73  | 0.32  | 0.42  | -0.79 | -0.87 | -0.75 | 0.12  | 0.27  |
| HCl (Hydrogen sulfide)       | -0.52 | 1.53  | 1.10  | 0.60  | 0.74  | -0.78 | -0.84 | -0.69 | 0.25  | 0.36  |
| HCN (Hydrogen cyanide)       | -0.49 | 1.80  | 1.13  | 0.68  | 0.38  | -0.67 | -0.75 | -0.65 | 0.14  | 0.36  |
| HCO (Formyl radical)         | -0.05 | 4.31  | 3.46  | 3.20  | 2.72  | -0.18 | 0.09  | 0.55  | 1.52  | 1.64  |
| HCOOH (Formic acid)          | -0.59 | 2.28  | 1.53  | 1.06  | 0.69  | -0.82 | -0.90 | -0.77 | 0.15  | 0.28  |
| He (Helium atom)             | -2.63 | -1.24 | -1.34 | -1.23 | -1.36 | -2.94 | -3.08 | -2.80 | -1.42 | -1.26 |
| HF (Hydrogen fluoride)       | -0.64 | 1.26  | 0.96  | 0.51  | 0.71  | -0.88 | -0.98 | -0.79 | 0.29  | 0.38  |
| Li (Lithium atom)            | 0.62  | 2.17  | 1.35  | 1.03  | 1.52  | -0.28 | -0.27 | -0.20 | 0.27  | 23.96 |
| Mg (Magnesium atom)          | -0.24 | 1.76  | 1.34  | 0.97  | 0.92  | -0.39 | -0.40 | -0.30 | 0.34  | 0.35  |
| N (Nitrogen atom)            | -0.34 | 4.91  | 4.13  | 3.12  | 3.16  | -0.17 | 0.00  | 0.47  | 1.69  | 3.19  |
| N2 (Nitrogen diatomic)       | -2.32 | 2.69  | 1.96  | 1.49  | 1.01  | -2.05 | -1.79 | -1.29 | -0.63 | -0.81 |
| N2H4 (Hydrazine)             | -0.46 | 1.31  | 0.95  | 0.53  | 0.68  | -0.75 | -0.83 | -0.67 | 0.36  | 0.45  |
| N2O (Nitrous oxide)          | -2.05 | 2.31  | 1.56  | 1.07  | 0.84  | -1.64 | -1.71 | -1.37 | -0.25 | -0.17 |
| Na (Sodium atom)             | 0.54  | 2.36  | 1.00  | 0.82  | 1.71  | -0.25 | -0.25 | -0.21 | 0.21  | 18.24 |
| NaCl (Sodium Chloride)       | 0.64  | 2.49  | 2.27  | 1.90  | 2.03  | 0.40  | 0.31  | 0.47  | 1.67  | 1.68  |
| Ne (Neon atom)               | -5.32 | -2.06 | -2.33 | -3.70 | -2.65 | -5.78 | -5.79 | -5.55 | -3.78 | -3.99 |
| NF3 (Nitrogen trifluoride)   | -2.04 | 1.81  | 1.02  | 0.26  | 0.06  | -2.18 | -2.27 | -2.01 | -0.65 | -0.55 |
| NH (Imidogen)                | 0.14  | 5.39  | 4.32  | 3.50  | 3.31  | 0.09  | 0.34  | 0.80  | 1.80  | 1.80  |
| NH2 (Amino radical)          | 0.54  | 5.75  | 4.54  | 3.54  | 3.45  | 0.32  | 0.60  | 1.07  | 1.95  | 1.17  |
| NH3 (Ammonia)                | -0.57 | 1.02  | 0.73  | 0.35  | 0.52  | -0.83 | -0.91 | -0.76 | 0.20  | 0.33  |
| NO (Nitric oxide)            | -0.43 | 4.57  | 4.24  | 3.79  | 3.18  | -0.06 | 0.25  | 0.83  | 1.45  | -0.36 |
| NO2 (Nitrogen dioxide)       | 1.47  | 5.95  | 5.06  | 4.59  | 4.35  | 1.40  | 1.66  | 2.11  | 3.01  | 1.82  |
| O (Oxygen atom)              | 1.24  | 7.70  | 6.49  | 4.97  | 5.13  | 1.64  | 1.87  | 2.41  | 3.04  | 1.64  |
| O2 (Oxygen diatomic)         | -0.14 | 5.42  | 4.51  | 3.96  | 3.44  | 0.17  | 0.49  | 1.05  | 1.61  | -0.30 |
| O3 (Ozone)                   | 2.30  | 6.98  | 6.21  | 6.01  | 5.62  | 2.67  | 2.94  | 3.40  | 4.11  | 2.34  |
| OCS (Carbonyl sulfide)       | -0.86 | 2.62  | 1.93  | 1.54  | 1.23  | -1.26 | -1.20 | -0.81 | 0.02  | 0.11  |
| OH (Hydroxyl radical)        | 1.60  | 7.79  | 6.46  | 5.14  | 5.04  | 1.67  | 1.93  | 2.47  | 2.94  | 1.22  |
| P (Phosphorus atom)          | 0.61  | 4.59  | 3.74  | 3.41  | 3.25  | 0.65  | 0.92  | 1.25  | 2.54  | 4.19  |
| P2 (Phosphorus diatomic)     | 0.46  | 4.01  | 3.42  | 3.23  | 2.79  | 0.46  | 0.63  | 0.96  | 1.74  | 0.68  |
| PF3 (Phosphorus trifluoride) | -1.23 | 1.51  | 0.86  | 0.39  | 0.32  | -1.52 | -1.57 | -1.36 | -0.27 | -0.20 |
| PH3 (Phosphine)              | -0.52 | 1.01  | 0.66  | 0.26  | 0.45  | -0.79 | -0.86 | -0.72 | 0.17  | 0.34  |

|                              |       |      |      |      |      |       |       |       |      |      |
|------------------------------|-------|------|------|------|------|-------|-------|-------|------|------|
| S (Sulfur atom)              | 1.95  | 6.61 | 5.64 | 5.26 | 4.89 | 2.03  | 2.36  | 2.80  | 3.57 | 2.61 |
| S2 (Sulfur diatomic)         | 1.45  | 5.28 | 4.51 | 4.33 | 3.86 | 1.32  | 1.55  | 1.94  | 2.81 | 1.57 |
| Si (Silicon atom)            | 1.34  | 4.52 | 4.36 | 4.04 | 3.51 | 0.89  | 1.13  | 1.55  | 2.39 | 4.12 |
| Si2H6 (Disilane)             | -0.66 | 1.08 | 0.65 | 0.23 | 0.37 | -0.84 | -0.91 | -0.78 | 0.14 | 0.35 |
| SiF2 (Silicon difluoride)    | 0.07  | 3.64 | 3.01 | 2.73 | 2.40 | -0.09 | 0.10  | 0.44  | 1.34 | 0.58 |
| SiF4 (Silicon tetrafluoride) | -0.81 | 1.75 | 1.19 | 0.60 | 0.78 | -1.16 | -1.22 | -1.02 | 0.27 | 0.27 |
| SiH3 (Silyl)                 | 0.82  | 4.41 | 3.54 | 3.38 | 3.01 | 1.07  | 1.19  | 1.30  | 2.85 | 6.34 |
| SiH4 (Silane)                | -0.59 | 0.78 | 0.46 | 0.14 | 0.29 | -0.83 | -0.91 | -0.78 | 0.08 | 0.29 |
| SiO (Silicon monoxide)       | 0.01  | 3.45 | 2.87 | 2.55 | 2.26 | -0.14 | 0.03  | 0.35  | 1.24 | 0.58 |
| SO2 (Sulfur dioxide)         | 0.87  | 5.13 | 4.42 | 4.18 | 3.76 | 0.95  | 1.20  | 1.64  | 2.44 | 1.09 |
| <hr/>                        |       |      |      |      |      |       |       |       |      |      |
| MAE                          |       | 3.15 | 2.53 | 2.87 | 1.96 | 0.29  | 0.34  | 0.42  | 1.26 | 1.80 |
| MSE                          |       | 3.15 | 2.53 | 2.87 | 1.95 | -0.07 | -0.03 | 0.24  | 1.25 | 1.75 |
| RMS                          |       | 3.44 | 2.81 | 8.90 | 2.15 | 0.37  | 0.41  | 0.56  | 1.80 | 5.57 |

Table S6. Fundamental gaps (1) [in eV] of the 121 molecules studied. The reference values are calculated by CCSD.

| Molecule                           | CCSD  | LDA   | PBE   | M06L  | B3LYP | $\omega$ B97 | $\omega$ B97X | $\omega$ B97X-D | M06-2X | M06-HF |
|------------------------------------|-------|-------|-------|-------|-------|--------------|---------------|-----------------|--------|--------|
| Al (Aluminum atom)                 | 5.55  | 5.44  | 5.49  | 5.55  | 5.56  | 5.69         | 5.67          | 5.62            | 5.47   | 5.50   |
| AlCl3 (Aluminum trichloride)       | 12.23 | 10.70 | 10.57 | 11.47 | 11.08 | 12.48        | 12.20         | 11.84           | 11.79  | 11.83  |
| Ar (Argon atom)                    | 18.49 | 18.56 | 18.29 | 18.93 | 18.36 | 18.67        | 18.62         | 18.51           | 18.32  | 17.93  |
| B (Boron atom)                     | 8.02  | 7.96  | 8.05  | 8.34  | 8.27  | 8.27         | 8.27          | 8.21            | 8.06   | 7.96   |
| BCl3 (Borane, trichloro-)          | 12.22 | 10.98 | 10.82 | 11.32 | 11.29 | 12.13        | 11.92         | 11.70           | 11.82  | 12.09  |
| Be (Beryllium atom)                | 9.67  | 9.09  | 8.99  | 9.14  | 9.18  | 9.35         | 9.22          | 9.08            | 9.36   | 9.45   |
| BF3 (Borane, trifluoro-)           | 17.38 | 15.43 | 15.04 | 15.33 | 15.84 | 16.69        | 16.53         | 16.34           | 16.88  | 17.70  |
| C (Carbon atom)                    | 10.02 | 9.92  | 9.95  | 10.09 | 10.17 | 10.16        | 10.16         | 10.13           | 10.05  | 10.06  |
| C2F4 (Tetrafluoroethylene)         | 11.98 | 11.23 | 10.86 | 11.67 | 11.29 | 11.68        | 11.71         | 11.62           | 11.83  | 12.59  |
| C2H2 (Acetylene)                   | 13.33 | 12.34 | 11.79 | 11.64 | 11.79 | 11.91        | 11.94         | 11.92           | 11.99  | 13.50  |
| C2H2O2 (Ethanediol)                | 10.23 | 8.96  | 8.94  | 9.22  | 9.41  | 9.91         | 9.82          | 9.66            | 9.87   | 10.35  |
| C2H4 (Ethylene)                    | 12.32 | 11.57 | 11.08 | 11.08 | 11.16 | 11.12        | 11.14         | 11.29           | 11.27  | 12.24  |
| C2H4O (Ethylene oxide)             | 11.54 | 11.24 | 10.85 | 11.10 | 11.04 | 11.31        | 11.27         | 11.19           | 11.55  | 11.77  |
| C2H4S (Thiirane)                   | 9.80  | 9.74  | 9.37  | 9.63  | 9.51  | 9.67         | 9.67          | 9.62            | 9.84   | 9.91   |
| C2H5N (Aziridine)                  | 10.35 | 10.33 | 9.98  | 10.25 | 10.14 | 10.40        | 10.36         | 10.27           | 10.46  | 10.34  |
| C2H6 (Ethane)                      | 13.46 | 12.49 | 12.33 | 12.88 | 12.75 | 13.25        | 13.18         | 13.02           | 13.14  | 13.14  |
| C2HF3 (Trifluoroethylene)          | 11.05 | 10.80 | 10.35 | 11.50 | 10.68 | 10.81        | 10.84         | 10.79           | 12.04  | 12.36  |
| C2N2 (Cyanogen)                    | 13.80 | 13.18 | 12.98 | 13.11 | 13.03 | 13.33        | 13.26         | 13.20           | 13.47  | 13.70  |
| C3H4 (Cyclopropene)                | 11.66 | 10.52 | 10.15 | 11.18 | 10.27 | 10.43        | 10.43         | 10.36           | 10.49  | 11.79  |
| C3H6 (Cyclopropane)                | 11.56 | 11.58 | 11.18 | 11.48 | 11.31 | 11.59        | 11.58         | 11.49           | 11.57  | 11.31  |
| C3H8 (Propane)                     | 12.83 | 11.61 | 11.47 | 12.00 | 11.99 | 12.63        | 12.53         | 12.33           | 12.42  | 12.52  |
| C3O2 (Carbon suboxide)             | 11.35 | 11.70 | 11.51 | 11.61 | 11.43 | 11.69        | 11.72         | 11.70           | 11.77  | 11.49  |
| C4H2 (Diacetylene)                 | 11.47 | 10.83 | 10.57 | 10.86 | 10.70 | 10.68        | 10.67         | 10.99           | 11.18  | 11.45  |
| C4H4O (Furan)                      | 9.68  | 9.71  | 9.25  | 9.39  | 9.30  | 9.51         | 9.50          | 9.45            | 10.51  | 10.75  |
| C4H6 (Cyclobutene)                 | 11.86 | 10.18 | 9.80  | 10.22 | 9.88  | 10.07        | 10.08         | 10.03           | 10.67  | 11.97  |
| C4N2 (2-Butynedinitrile)           | 11.47 | 10.55 | 10.42 | 10.57 | 10.57 | 10.94        | 10.87         | 10.78           | 11.05  | 11.33  |
| CCl4 (Carbon tetrachloride)        | 12.29 | 10.42 | 10.31 | 10.87 | 10.93 | 12.35        | 12.07         | 11.66           | 11.88  | 12.64  |
| CF2Cl2 (Difluorodichloromethane)   | 13.32 | 12.16 | 11.92 | 12.55 | 12.41 | 13.50        | 13.33         | 13.04           | 13.16  | 13.23  |
| CF2O (Carbonic difluoride)         | 15.97 | 14.34 | 13.92 | 14.42 | 14.25 | 14.70        | 14.66         | 14.57           | 15.18  | 15.58  |
| CF3Br (Bromotrifluoromethane)      | 12.83 | 12.42 | 12.10 | 12.29 | 12.42 | 12.81        | 12.76         | 12.64           | 12.69  | 12.99  |
| CF3Cl (Methane, chlorotrifluoro-)  | 14.15 | 13.63 | 13.29 | 13.92 | 13.74 | 14.22        | 14.18         | 14.07           | 14.21  | 14.07  |
| CF4 (Carbon tetrafluoride)         | 18.11 | 15.95 | 15.56 | 16.43 | 16.54 | 17.35        | 17.31         | 17.12           | 17.74  | 18.69  |
| CFCl3 (Trichloromonofluoromethane) | 12.64 | 11.06 | 10.90 | 11.56 | 11.44 | 12.75        | 12.50         | 12.14           | 12.34  | 12.95  |
| CH2CCH2 (Allene)                   | 10.72 | 10.86 | 10.45 | 10.66 | 10.53 | 10.70        | 10.71         | 10.67           | 11.07  | 10.60  |
| CH2CCl2 (Ethene, 1,1-dichloro-)    | 10.97 | 10.51 | 9.90  | 10.60 | 10.13 | 10.55        | 10.49         | 10.37           | 10.48  | 10.42  |

|                                                         |       |       |       |       |       |       |       |       |       |       |
|---------------------------------------------------------|-------|-------|-------|-------|-------|-------|-------|-------|-------|-------|
| CH <sub>2</sub> CF <sub>2</sub> (Ethene, 1,1-difluoro-) | 11.64 | 11.22 | 10.74 | 10.84 | 10.96 | 11.09 | 11.11 | 11.07 | 11.24 | 12.52 |
| CH <sub>2</sub> CHCHO (Acrolein)                        | 10.58 | 9.87  | 9.74  | 9.92  | 9.93  | 10.16 | 10.10 | 10.05 | 10.21 | 10.43 |
| CH <sub>2</sub> CHCl (Ethene, chloro-)                  | 10.97 | 11.11 | 10.22 | 11.11 | 10.36 | 10.66 | 10.62 | 10.53 | 11.37 | 11.57 |
| CH <sub>2</sub> CHF (Ethene, fluoro-)                   | 11.39 | 11.25 | 10.78 | 11.78 | 11.81 | 11.00 | 11.02 | 10.97 | 12.14 | 12.41 |
| CH <sub>2</sub> Cl <sub>2</sub> (Methylene chloride)    | 12.17 | 11.19 | 10.99 | 11.54 | 11.58 | 12.29 | 12.17 | 11.97 | 12.10 | 12.05 |
| CH <sub>2</sub> CO (Ketene)                             | 10.20 | 10.54 | 10.12 | 10.17 | 10.17 | 10.32 | 10.33 | 10.28 | 10.68 | 11.00 |
| CH <sub>2</sub> F <sub>2</sub> (Methane, difluoro-)     | 14.27 | 13.11 | 12.80 | 13.19 | 13.43 | 13.78 | 13.75 | 13.62 | 14.04 | 14.52 |
| CH <sub>3</sub> (Methyl radical)                        | 9.95  | 9.73  | 9.96  | 10.08 | 9.91  | 9.94  | 9.90  | 9.87  | 9.85  | 9.66  |
| CH <sub>3</sub> CCCH <sub>3</sub> (2-Butyne)            | 10.32 | 9.92  | 9.60  | 9.77  | 10.34 | 10.09 | 10.08 | 10.01 | 10.20 | 10.56 |
| CH <sub>3</sub> CCH (Propyne)                           | 10.94 | 10.94 | 10.55 | 10.72 | 10.67 | 10.85 | 10.85 | 10.79 | 10.90 | 11.23 |
| CH <sub>3</sub> CH <sub>2</sub> Cl (Ethyl chloride)     | 11.64 | 11.64 | 10.98 | 11.58 | 11.31 | 11.70 | 11.66 | 11.56 | 11.67 | 11.44 |
| CH <sub>3</sub> CH <sub>2</sub> OH (Ethanol)            | 11.29 | 10.75 | 10.50 | 10.87 | 10.88 | 11.27 | 11.21 | 11.08 | 11.29 | 11.30 |
| CH <sub>3</sub> Cl (Methyl chloride)                    | 11.90 | 11.69 | 11.41 | 11.79 | 11.64 | 11.96 | 11.93 | 11.85 | 11.96 | 12.67 |
| CH <sub>3</sub> COCl (Acetyl Chloride)                  | 12.14 | 11.28 | 10.99 | 11.28 | 11.23 | 11.62 | 11.57 | 11.45 | 11.84 | 12.77 |
| CH <sub>3</sub> F (Methyl fluoride)                     | 14.04 | 13.41 | 13.10 | 13.39 | 13.51 | 13.80 | 13.76 | 13.66 | 13.92 | 14.11 |
| CH <sub>3</sub> NHCH <sub>3</sub> (Dimethylamine)       | 9.55  | 9.41  | 9.12  | 9.37  | 9.32  | 9.64  | 9.60  | 9.50  | 9.60  | 9.62  |
| CH <sub>3</sub> NO <sub>2</sub> (Methane, nitro-)       | 11.69 | 11.20 | 10.93 | 11.19 | 11.39 | 12.18 | 12.11 | 11.94 | 12.06 | 12.47 |
| CH <sub>3</sub> OCH <sub>3</sub> (Dimethyl ether)       | 10.69 | 10.39 | 10.09 | 10.38 | 10.36 | 10.70 | 10.66 | 10.56 | 10.69 | 10.63 |
| CH <sub>3</sub> OH (Methyl alcohol)                     | 11.57 | 11.35 | 11.02 | 11.21 | 11.28 | 11.57 | 11.53 | 11.43 | 11.62 | 11.68 |
| CH <sub>3</sub> SH (Methanethiol)                       | 9.90  | 9.86  | 9.56  | 9.97  | 9.72  | 9.99  | 9.99  | 9.94  | 9.97  | 9.75  |
| CH <sub>3</sub> SiH <sub>3</sub> (Methyl silane)        | 12.26 | 11.75 | 11.57 | 12.02 | 11.94 | 12.82 | 12.74 | 12.57 | 12.19 | 12.41 |
| CH <sub>4</sub> (Methane)                               | 15.01 | 14.67 | 14.40 | 14.79 | 14.66 | 14.86 | 14.85 | 14.78 | 14.90 | 14.89 |
| CHCl <sub>3</sub> (Chloroform)                          | 12.18 | 10.90 | 10.74 | 11.32 | 11.25 | 12.30 | 12.10 | 11.80 | 11.97 | 12.08 |
| CHF <sub>3</sub> (Methane, trifluoro-)                  | 15.58 | 14.32 | 13.95 | 14.29 | 14.65 | 15.04 | 14.99 | 15.77 | 15.29 | 15.90 |
| CHONH <sub>2</sub> (Formamide)                          | 10.67 | 10.82 | 10.40 | 11.59 | 10.52 | 10.71 | 10.67 | 10.58 | 12.01 | 12.26 |
| Cl (Chlorine atom)                                      | 9.33  | 9.42  | 9.32  | 9.28  | 9.40  | 9.39  | 9.38  | 9.39  | 9.38  | 9.44  |
| Cl <sub>2</sub> (Chlorine diatomic)                     | 11.00 | 10.41 | 10.30 | 10.73 | 10.52 | 10.96 | 10.87 | 10.79 | 10.94 | 11.03 |
| ClF (Chlorine monofluoride)                             | 12.47 | 11.96 | 11.79 | 12.20 | 12.06 | 12.29 | 12.28 | 12.27 | 12.54 | 12.73 |
| ClF <sub>3</sub> (Chlorine trifluoride)                 | 12.05 | 11.05 | 10.93 | 11.28 | 11.37 | 11.70 | 11.69 | 11.63 | 12.01 | 12.47 |
| ClO (Monochlorine monoxide)                             | 8.99  | 8.88  | 8.80  | 8.92  | 8.97  | 9.00  | 9.01  | 9.01  | 8.97  | 9.08  |
| CO (Carbon monoxide)                                    | 15.49 | 15.08 | 14.77 | 14.83 | 15.18 | 15.71 | 15.64 | 15.37 | 15.44 | 15.98 |
| CO <sub>2</sub> (Carbon dioxide)                        | 14.61 | 14.73 | 14.31 | 14.89 | 14.47 | 14.90 | 14.84 | 14.75 | 14.89 | 15.02 |
| CS (Carbon monosulfide)                                 | 11.43 | 11.37 | 11.19 | 11.22 | 11.33 | 12.67 | 12.59 | 11.39 | 11.43 | 11.65 |
| CS <sub>2</sub> (Carbon disulfide)                      | 9.91  | 10.21 | 10.00 | 10.27 | 9.91  | 11.23 | 9.85  | 9.94  | 10.09 | 9.94  |
| F (Fluorine atom)                                       | 14.08 | 13.89 | 14.00 | 14.13 | 14.20 | 14.02 | 14.07 | 14.13 | 14.22 | 14.16 |
| F <sub>2</sub> (Fluorine diatomic)                      | 15.66 | 14.86 | 14.68 | 15.07 | 15.11 | 15.19 | 15.26 | 15.29 | 15.74 | 16.15 |
| F <sub>2</sub> O (Difluorine monoxide)                  | 13.93 | 12.93 | 12.77 | 13.20 | 13.32 | 13.56 | 13.59 | 13.58 | 14.08 | 14.63 |
| FCN (Cyanogen fluoride)                                 | 14.21 | 14.12 | 13.73 | 14.22 | 13.87 | 14.17 | 14.16 | 14.10 | 14.27 | 14.37 |



|                                                   |       |       |       |       |       |       |       |       |       |       |
|---------------------------------------------------|-------|-------|-------|-------|-------|-------|-------|-------|-------|-------|
| H (Hydrogen atom)                                 | 12.86 | 12.19 | 12.90 | 13.12 | 12.76 | 13.00 | 12.91 | 12.87 | 12.96 | 12.89 |
| H <sub>2</sub> CO (Formaldehyde)                  | 11.43 | 11.44 | 11.24 | 11.50 | 11.30 | 11.84 | 11.42 | 11.66 | 11.82 | 12.08 |
| H <sub>2</sub> CS (Thioformaldehyde)              | 9.05  | 9.00  | 8.83  | 8.98  | 8.86  | 8.84  | 8.87  | 8.91  | 9.04  | 9.21  |
| H <sub>2</sub> O (Water)                          | 13.21 | 13.69 | 13.18 | 13.24 | 13.20 | 13.41 | 13.35 | 13.27 | 13.37 | 13.41 |
| H <sub>2</sub> O <sub>2</sub> (Hydrogen peroxide) | 12.71 | 12.05 | 11.70 | 12.06 | 12.21 | 12.47 | 12.43 | 12.32 | 12.77 | 13.21 |
| H <sub>2</sub> S (Hydrogen sulfide)               | 10.88 | 11.07 | 10.73 | 11.12 | 10.81 | 11.03 | 11.03 | 10.99 | 11.02 | 10.83 |
| HCCCN (Cyanoacetylene)                            | 12.07 | 11.82 | 11.56 | 11.74 | 11.68 | 12.04 | 11.90 | 11.91 | 12.14 | 12.38 |
| HCCF (Fluoroacetylene)                            | 11.90 | 11.98 | 11.51 | 12.74 | 11.65 | 11.76 | 11.79 | 11.76 | 13.10 | 13.37 |
| HCl (Hydrogen sulfide)                            | 13.21 | 13.42 | 13.06 | 13.42 | 13.14 | 13.37 | 13.36 | 13.31 | 13.38 | 13.28 |
| HCN (Hydrogen cyanide)                            | 14.11 | 14.65 | 14.09 | 14.77 | 14.05 | 14.03 | 14.04 | 14.01 | 15.09 | 15.40 |
| HCO (Formyl radical)                              | 9.73  | 9.58  | 9.72  | 9.81  | 9.93  | 9.96  | 9.95  | 9.92  | 9.87  | 9.98  |
| HCOOH (Formic acid)                               | 11.85 | 11.92 | 11.44 | 12.27 | 11.63 | 11.88 | 11.84 | 11.74 | 12.83 | 13.27 |
| He (Helium atom)                                  | 27.20 | 26.83 | 26.79 | 27.32 | 27.31 | 27.30 | 27.26 | 27.21 | 27.19 | 27.02 |
| HF (Hydrogen fluoride)                            | 16.76 | 17.35 | 16.76 | 16.71 | 16.78 | 16.94 | 16.85 | 16.77 | 16.86 | 16.87 |
| Li (Lithium atom)                                 | 4.72  | 4.95  | 5.07  | 4.58  | 5.07  | 4.93  | 4.82  | 4.86  | 4.89  | 5.43  |
| Mg (Magnesium atom)                               | 7.77  | 7.85  | 7.63  | 7.73  | 7.80  | 7.96  | 7.89  | 7.69  | 8.03  | 7.98  |
| N (Nitrogen atom)                                 | 14.81 | 14.65 | 14.45 | 14.89 | 14.43 | 14.60 | 14.65 | 14.69 | 14.67 | 14.34 |
| N <sub>2</sub> (Nitrogen diatomic)                | 18.03 | 17.30 | 17.03 | 17.24 | 17.29 | 17.79 | 17.77 | 17.62 | 17.77 | 18.89 |
| N <sub>2</sub> H <sub>4</sub> (Hydrazine)         | 10.30 | 9.88  | 9.65  | 10.15 | 9.94  | 10.29 | 10.24 | 10.12 | 10.33 | 10.46 |
| N <sub>2</sub> O (Nitrous oxide)                  | 14.82 | 14.32 | 13.87 | 14.74 | 13.92 | 14.25 | 14.23 | 14.18 | 14.83 | 14.72 |
| Na (Sodium atom)                                  | 4.14  | 4.82  | 4.81  | 4.02  | 4.85  | 4.34  | 4.31  | 4.45  | 4.61  | 5.09  |
| NaCl (Sodium Chloride)                            | 8.48  | 8.92  | 8.52  | 8.83  | 8.51  | 8.61  | 8.63  | 8.60  | 8.67  | 8.37  |
| Ne (Neon atom)                                    | 26.78 | 27.15 | 26.59 | 26.65 | 26.61 | 27.10 | 26.90 | 26.81 | 26.38 | 26.25 |
| NF <sub>3</sub> (Nitrogen trifluoride)            | 15.77 | 14.62 | 14.29 | 14.97 | 14.86 | 15.39 | 15.37 | 15.25 | 15.41 | 15.56 |
| NH (Imidogen)                                     | 13.30 | 13.15 | 13.23 | 13.39 | 13.21 | 13.26 | 13.27 | 13.29 | 13.30 | 13.27 |
| NH <sub>2</sub> (Amino radical)                   | 11.42 | 11.19 | 11.33 | 11.34 | 11.50 | 11.51 | 11.43 | 11.40 | 11.29 | 11.20 |
| NH <sub>3</sub> (Ammonia)                         | 11.42 | 11.77 | 11.34 | 11.44 | 11.41 | 11.59 | 11.55 | 11.48 | 11.56 | 11.54 |
| NO (Nitric oxide)                                 | 10.22 | 10.17 | 10.03 | 10.18 | 10.33 | 10.29 | 10.33 | 10.33 | 10.38 | 10.66 |
| NO <sub>2</sub> (Nitrogen dioxide)                | 10.10 | 9.88  | 9.97  | 10.22 | 10.26 | 10.25 | 10.27 | 10.30 | 10.34 | 10.55 |
| O (Oxygen atom)                                   | 12.22 | 12.01 | 12.29 | 12.39 | 12.46 | 12.33 | 12.31 | 12.33 | 12.27 | 12.43 |
| O <sub>2</sub> (Oxygen diatomic)                  | 12.75 | 12.67 | 12.66 | 13.07 | 12.97 | 12.95 | 12.99 | 13.03 | 13.13 | 13.14 |
| O <sub>3</sub> (Ozone)                            | 10.99 | 10.85 | 10.70 | 10.69 | 10.70 | 10.74 | 10.73 | 10.74 | 10.90 | 11.26 |
| OCS (Carbonyl sulfide)                            | 12.07 | 12.53 | 12.24 | 12.53 | 12.01 | 12.26 | 12.26 | 12.23 | 12.59 | 12.49 |
| OH (Hydroxyl radical)                             | 11.36 | 11.21 | 11.33 | 11.41 | 11.49 | 11.41 | 11.41 | 11.42 | 11.43 | 11.30 |
| P (Phosphorus atom)                               | 9.83  | 9.53  | 9.61  | 9.96  | 9.43  | 9.67  | 9.58  | 9.54  | 9.46  | 9.20  |
| P <sub>2</sub> (Phosphorus diatomic)              | 9.98  | 10.16 | 9.93  | 10.01 | 9.82  | 9.63  | 10.19 | 10.20 | 9.90  | 9.83  |
| PF <sub>3</sub> (Phosphorus trifluoride)          | 12.97 | 12.48 | 12.09 | 12.45 | 12.51 | 12.92 | 12.90 | 12.79 | 12.80 | 13.01 |
| PH <sub>3</sub> (Phosphine)                       | 11.05 | 11.10 | 10.83 | 11.27 | 10.97 | 11.13 | 11.15 | 11.12 | 11.07 | 10.69 |

|                              |       |       |       |       |       |       |       |       |       |       |
|------------------------------|-------|-------|-------|-------|-------|-------|-------|-------|-------|-------|
| S (Sulfur atom)              | 8.26  | 8.22  | 8.27  | 8.23  | 8.35  | 8.36  | 8.34  | 8.33  | 8.32  | 8.33  |
| S2 (Sulfur diatomic)         | 8.07  | 8.00  | 8.10  | 8.30  | 8.15  | 8.32  | 8.24  | 8.19  | 8.16  | 8.05  |
| Si (Silicon atom)            | 6.75  | 6.78  | 6.70  | 6.67  | 6.77  | 6.85  | 6.84  | 6.80  | 6.72  | 6.76  |
| Si2H6 (Disilane)             | 11.22 | 10.85 | 10.58 | 11.18 | 10.83 | 11.16 | 11.15 | 11.08 | 11.10 | 11.03 |
| SiF2 (Silicon difluoride)    | 11.03 | 10.81 | 10.52 | 10.75 | 10.79 | 10.97 | 10.93 | 10.85 | 10.86 | 10.84 |
| SiF4 (Silicon tetrafluoride) | 17.72 | 15.23 | 14.91 | 15.88 | 15.87 | 16.98 | 16.85 | 16.56 | 17.18 | 18.25 |
| SiH3 (Silyl)                 | 8.02  | 7.80  | 8.01  | 8.13  | 7.99  | 7.98  | 7.97  | 7.96  | 8.08  | 7.96  |
| SiH4 (Silane)                | 13.45 | 12.69 | 12.52 | 13.23 | 12.90 | 13.41 | 13.33 | 13.18 | 13.17 | 13.12 |
| SiO (Silicon monoxide)       | 11.50 | 11.35 | 11.07 | 11.25 | 11.25 | 11.52 | 11.48 | 11.40 | 11.51 | 11.72 |
| SO2 (Sulfur dioxide)         | 11.71 | 11.50 | 11.31 | 11.43 | 11.42 | 11.54 | 11.53 | 11.52 | 11.67 | 11.85 |
| MAE                          |       | 0.51  | 0.65  | 0.44  | 0.45  | 0.28  | 0.26  | 0.30  | 0.27  | 0.33  |
| MSE                          |       | -0.39 | -0.63 | -0.29 | -0.39 | -0.09 | -0.14 | -0.22 | -0.02 | 0.18  |
| RMS                          |       | 0.71  | 0.88  | 0.62  | 0.62  | 0.42  | 0.41  | 0.44  | 0.40  | 0.46  |

Table S7. Fundamental gaps (2) [in eV] of the 121 molecules studied. The reference values are calculated by CCSD.

| Molecule                           | CCSD  | LDA   | PBE   | M06L  | B3LYP | $\omega$ B97 | $\omega$ B97X | $\omega$ B97X-D | M06-2X | M06-HF |
|------------------------------------|-------|-------|-------|-------|-------|--------------|---------------|-----------------|--------|--------|
| Al (Aluminum atom)                 | 5.55  | 4.29  | 4.35  | 4.61  | 4.55  | 5.28         | 5.21          | 5.02            | 4.75   | 5.06   |
| AlCl3 (Aluminum trichloride)       | 12.23 | 9.55  | 9.41  | 10.19 | 10.20 | 12.34        | 11.91         | 11.36           | 11.39  | 12.25  |
| Ar (Argon atom)                    | 18.49 | 15.04 | 14.88 | 15.48 | 15.98 | 17.79        | 17.37         | 16.64           | 16.95  | 18.30  |
| B (Boron atom)                     | 8.02  | 5.89  | 5.95  | 6.20  | 6.48  | 7.34         | 7.22          | 6.93            | 6.83   | 7.05   |
| BCl3 (Borane, trichloro-)          | 12.22 | 10.42 | 9.79  | 10.18 | 10.87 | 11.68        | 11.50         | 11.33           | 11.68  | 12.28  |
| Be (Beryllium atom)                | 9.67  | 7.06  | 6.92  | 7.06  | 7.46  | 9.18         | 8.94          | 8.57            | 8.16   | 9.14   |
| BF3 (Borane, trifluoro-)           | 17.38 | 12.44 | 12.10 | 12.18 | 13.78 | 16.06        | 15.72         | 15.12           | 15.97  | 18.84  |
| C (Carbon atom)                    | 10.02 | 7.95  | 7.98  | 8.37  | 8.48  | 9.00         | 8.91          | 8.72            | 8.85   | 9.31   |
| C2F4 (Tetrafluoroethylene)         | 11.98 | 8.74  | 8.09  | 9.09  | 9.53  | 11.66        | 11.40         | 10.80           | 10.86  | 13.36  |
| C2H2 (Acetylene)                   | 13.33 | 8.79  | 8.45  | 8.61  | 9.35  | 11.86        | 11.56         | 10.95           | 10.85  | 13.81  |
| C2H2O2 (Ethanediol)                | 10.23 | 8.64  | 8.58  | 8.89  | 9.14  | 9.56         | 9.50          | 9.37            | 9.74   | 10.52  |
| C2H4 (Ethylene)                    | 12.32 | 8.52  | 8.19  | 8.29  | 8.98  | 11.25        | 10.95         | 10.56           | 10.37  | 12.73  |
| C2H4O (Ethylene oxide)             | 11.54 | 7.98  | 7.70  | 8.03  | 9.01  | 11.32        | 11.05         | 10.45           | 10.97  | 13.57  |
| C2H4S (Thiirane)                   | 9.80  | 7.09  | 6.80  | 7.07  | 7.68  | 9.90         | 9.58          | 9.01            | 9.00   | 10.82  |
| C2H5N (Aziridine)                  | 10.35 | 7.46  | 7.21  | 7.52  | 8.28  | 10.52        | 10.21         | 9.62            | 9.75   | 11.41  |
| C2H6 (Ethane)                      | 13.46 | 9.75  | 9.61  | 10.10 | 10.77 | 13.10        | 12.80         | 12.20           | 12.17  | 13.77  |
| C2HF3 (Trifluoroethylene)          | 11.05 | 8.04  | 7.68  | 9.15  | 8.73  | 10.79        | 10.55         | 9.99            | 11.28  | 13.03  |
| C2N2 (Cyanogen)                    | 13.80 | 12.67 | 12.49 | 12.75 | 12.68 | 13.16        | 13.05         | 12.93           | 13.17  | 13.48  |
| C3H4 (Cyclopropene)                | 11.66 | 7.76  | 7.49  | 9.05  | 8.29  | 10.54        | 10.26         | 9.71            | 9.68   | 12.07  |
| C3H6 (Cyclopropane)                | 11.56 | 8.79  | 8.49  | 8.80  | 9.45  | 11.82        | 11.53         | 10.94           | 10.76  | 12.12  |
| C3H8 (Propane)                     | 12.83 | 9.23  | 9.10  | 9.54  | 10.25 | 12.60        | 12.31         | 11.72           | 11.64  | 13.06  |
| C3O2 (Carbon suboxide)             | 11.35 | 11.40 | 11.13 | 11.48 | 11.25 | 11.74        | 11.51         | 11.04           | 10.98  | 11.38  |
| C4H2 (Diacetylene)                 | 11.47 | 9.45  | 9.08  | 9.28  | 9.69  | 10.84        | 10.59         | 10.64           | 10.71  | 11.62  |
| C4H4O (Furan)                      | 9.68  | 7.29  | 6.93  | 7.15  | 7.66  | 9.80         | 9.54          | 9.04            | 9.96   | 11.35  |
| C4H6 (Cyclobutene)                 | 11.86 | 7.66  | 7.37  | 7.81  | 8.16  | 10.40        | 10.13         | 9.59            | 9.94   | 12.34  |
| C4N2 (2-Butynedinitrile)           | 11.47 | 10.30 | 10.18 | 10.36 | 10.39 | 10.87        | 10.77         | 10.64           | 10.88  | 11.27  |
| CCl4 (Carbon tetrachloride)        | 12.29 | 9.79  | 9.57  | 10.45 | 10.36 | 12.06        | 11.79         | 11.35           | 11.57  | 12.84  |
| CF2Cl2 (Difluorodichloromethane)   | 13.32 | 10.37 | 10.09 | 10.58 | 11.08 | 13.41        | 13.02         | 12.37           | 12.45  | 14.01  |
| CF2O (Carbonic difluoride)         | 15.97 | 11.11 | 10.79 | 11.36 | 12.19 | 14.35        | 14.05         | 13.42           | 14.48  | 17.12  |
| CF3Br (Bromotrifluoromethane)      | 12.83 | 10.36 | 10.00 | 10.56 | 10.99 | 12.74        | 12.43         | 11.92           | 12.22  | 13.16  |
| CF3Cl (Methane, chlorotrifluoro-)  | 14.15 | 10.97 | 10.69 | 11.36 | 11.80 | 14.07        | 13.70         | 13.09           | 13.30  | 14.94  |
| CF4 (Carbon tetrafluoride)         | 18.11 | 13.14 | 12.79 | 13.55 | 14.56 | 16.84        | 16.63         | 16.02           | 16.91  | 19.89  |
| CFCl3 (Trichloromonofluoromethane) | 12.64 | 9.97  | 9.74  | 10.42 | 10.60 | 12.50        | 12.21         | 11.74           | 11.93  | 13.13  |
| CH2CCH2 (Allene)                   | 10.72 | 8.18  | 7.89  | 8.32  | 8.73  | 11.00        | 10.72         | 10.17           | 10.38  | 11.35  |
| CH2CCl2 (Ethene, 1,1-dichloro-)    | 10.97 | 9.29  | 7.87  | 9.29  | 8.66  | 10.76        | 10.48         | 9.95            | 9.90   | 11.19  |

|                                                         |       |       |       |       |       |       |       |       |       |       |
|---------------------------------------------------------|-------|-------|-------|-------|-------|-------|-------|-------|-------|-------|
| CH <sub>2</sub> CF <sub>2</sub> (Ethene, 1,1-difluoro-) | 11.64 | 8.34  | 7.99  | 8.18  | 8.96  | 11.12 | 10.85 | 10.29 | 10.35 | 13.17 |
| CH <sub>2</sub> CHCHO (Acrolein)                        | 10.58 | 8.82  | 8.67  | 9.19  | 9.48  | 10.21 | 10.12 | 9.93  | 10.46 | 11.33 |
| CH <sub>2</sub> CHCl (Ethene, chloro-)                  | 10.97 | 9.53  | 7.86  | 9.43  | 8.67  | 10.76 | 10.48 | 9.94  | 10.90 | 11.85 |
| CH <sub>2</sub> CHF (Ethene, fluoro-)                   | 11.39 | 8.32  | 7.97  | 9.62  | 10.24 | 11.04 | 10.76 | 10.20 | 11.53 | 12.84 |
| CH <sub>2</sub> Cl <sub>2</sub> (Methylene chloride)    | 12.17 | 9.21  | 8.98  | 9.38  | 9.96  | 12.13 | 11.80 | 11.18 | 11.26 | 12.85 |
| CH <sub>2</sub> CO (Ketene)                             | 10.20 | 8.02  | 7.61  | 7.80  | 8.20  | 10.29 | 10.03 | 9.49  | 9.75  | 11.37 |
| CH <sub>2</sub> F <sub>2</sub> (Methane, difluoro-)     | 14.27 | 9.91  | 9.65  | 10.10 | 11.14 | 13.33 | 13.07 | 12.46 | 13.00 | 15.33 |
| CH <sub>3</sub> (Methyl radical)                        | 9.95  | 7.72  | 7.80  | 7.84  | 8.24  | 8.96  | 8.81  | 8.56  | 8.74  | 8.91  |
| CH <sub>3</sub> CCCH <sub>3</sub> (2-Butyne)            | 10.32 | 7.42  | 7.17  | 7.32  | 8.51  | 10.38 | 10.11 | 9.55  | 9.43  | 10.94 |
| CH <sub>3</sub> CCH (Propyne)                           | 10.94 | 8.14  | 7.81  | 8.23  | 8.61  | 10.98 | 10.67 | 10.09 | 9.91  | 11.62 |
| CH <sub>3</sub> CH <sub>2</sub> Cl (Ethyl chloride)     | 11.64 | 8.62  | 8.40  | 8.90  | 9.42  | 11.71 | 11.38 | 10.77 | 10.80 | 12.28 |
| CH <sub>3</sub> CH <sub>2</sub> OH (Ethanol)            | 11.29 | 7.80  | 7.55  | 7.89  | 8.86  | 11.18 | 10.90 | 10.27 | 10.59 | 12.58 |
| CH <sub>3</sub> Cl (Methyl chloride)                    | 11.90 | 8.84  | 8.62  | 8.81  | 9.62  | 11.85 | 11.51 | 10.90 | 10.97 | 13.43 |
| CH <sub>3</sub> COCl (Acetyl Chloride)                  | 12.14 | 9.20  | 8.82  | 9.20  | 9.61  | 11.73 | 11.47 | 10.90 | 11.48 | 12.53 |
| CH <sub>3</sub> F (Methyl fluoride)                     | 14.04 | 9.84  | 9.58  | 9.90  | 11.04 | 13.28 | 13.02 | 12.41 | 12.90 | 15.07 |
| CH <sub>3</sub> NHCH <sub>3</sub> (Dimethylamine)       | 9.55  | 6.62  | 6.40  | 6.73  | 7.50  | 9.82  | 9.53  | 8.93  | 8.97  | 10.34 |
| CH <sub>3</sub> NO <sub>2</sub> (Methane, nitro-)       | 11.69 | 9.04  | 8.62  | 8.96  | 10.03 | 11.92 | 11.66 | 11.04 | 11.77 | 11.47 |
| CH <sub>3</sub> OCH <sub>3</sub> (Dimethyl ether)       | 10.69 | 7.44  | 7.19  | 7.54  | 8.45  | 10.77 | 10.51 | 9.92  | 10.15 | 12.06 |
| CH <sub>3</sub> OH (Methyl alcohol)                     | 11.57 | 7.98  | 7.72  | 7.96  | 9.05  | 11.32 | 11.04 | 10.41 | 10.78 | 12.92 |
| CH <sub>3</sub> SH (Methanethiol)                       | 9.90  | 7.21  | 7.00  | 7.30  | 7.88  | 10.09 | 9.77  | 9.19  | 9.03  | 10.41 |
| CH <sub>3</sub> SiH <sub>3</sub> (Methyl silane)        | 12.26 | 9.49  | 9.17  | 9.48  | 10.15 | 12.53 | 12.24 | 11.65 | 11.38 | 12.72 |
| CH <sub>4</sub> (Methane)                               | 15.01 | 11.12 | 10.95 | 11.52 | 12.15 | 14.53 | 14.20 | 13.56 | 13.61 | 15.42 |
| CHCl <sub>3</sub> (Chloroform)                          | 12.18 | 9.51  | 9.29  | 9.71  | 10.19 | 12.18 | 11.82 | 11.22 | 11.42 | 12.92 |
| CHF <sub>3</sub> (Methane, trifluoro-)                  | 15.58 | 11.25 | 10.93 | 11.30 | 12.44 | 14.59 | 14.33 | 13.72 | 14.24 | 16.71 |
| CHONH <sub>2</sub> (Formamide)                          | 10.67 | 7.71  | 7.43  | 8.93  | 8.66  | 10.73 | 10.45 | 9.84  | 11.64 | 13.53 |
| Cl (Chlorine atom)                                      | 9.33  | 8.46  | 8.38  | 8.33  | 8.56  | 8.73  | 8.69  | 8.63  | 8.71  | 9.14  |
| Cl <sub>2</sub> (Chlorine diatomic)                     | 11.00 | 9.42  | 9.29  | 9.84  | 9.83  | 10.65 | 10.53 | 10.34 | 10.50 | 11.08 |
| ClF (Chlorine monofluoride)                             | 12.47 | 10.62 | 10.48 | 11.05 | 11.13 | 11.89 | 11.78 | 11.60 | 11.92 | 12.70 |
| ClF <sub>3</sub> (Chlorine trifluoride)                 | 12.05 | 10.57 | 10.39 | 10.88 | 11.02 | 11.41 | 11.39 | 11.32 | 11.73 | 12.36 |
| ClO (Monochlorine monoxide)                             | 8.99  | 6.69  | 8.10  | 8.15  | 8.35  | 8.50  | 8.48  | 8.44  | 8.46  | 8.84  |
| CO (Carbon monoxide)                                    | 15.49 | 12.06 | 11.78 | 12.04 | 13.02 | 15.18 | 14.83 | 14.17 | 14.46 | 16.52 |
| CO <sub>2</sub> (Carbon dioxide)                        | 14.61 | 11.56 | 11.24 | 11.81 | 12.39 | 14.40 | 14.11 | 13.53 | 13.84 | 15.78 |
| CS (Carbon monosulfide)                                 | 11.43 | 10.33 | 10.21 | 10.62 | 10.80 | 12.82 | 12.50 | 11.21 | 11.37 | 12.01 |
| CS <sub>2</sub> (Carbon disulfide)                      | 9.91  | 9.42  | 9.23  | 9.84  | 9.41  | 11.39 | 9.67  | 9.65  | 9.74  | 9.56  |
| F (Fluorine atom)                                       | 14.08 | 11.76 | 11.83 | 12.00 | 12.32 | 12.29 | 12.32 | 12.33 | 12.79 | 13.46 |
| F <sub>2</sub> (Fluorine diatomic)                      | 15.66 | 13.19 | 12.96 | 13.40 | 14.01 | 14.44 | 14.43 | 14.34 | 14.87 | 15.56 |
| F <sub>2</sub> O (Difluorine monoxide)                  | 13.93 | 11.50 | 11.25 | 11.98 | 12.44 | 13.13 | 13.09 | 12.94 | 13.66 | 14.87 |
| FCN (Cyanogen fluoride)                                 | 14.21 | 11.17 | 10.88 | 11.18 | 11.84 | 13.79 | 13.45 | 12.85 | 13.11 | 14.72 |

|                                                   |       |       |       |       |       |       |       |       |       |       |
|---------------------------------------------------|-------|-------|-------|-------|-------|-------|-------|-------|-------|-------|
| H (Hydrogen atom)                                 | 12.86 | 9.03  | 9.30  | 9.28  | 9.78  | 10.51 | 10.31 | 10.07 | 10.44 | 10.81 |
| H <sub>2</sub> CO (Formaldehyde)                  | 11.43 | 9.18  | 8.91  | 9.21  | 9.04  | 11.53 | 10.86 | 10.91 | 11.35 | 12.88 |
| H <sub>2</sub> CS (Thioformaldehyde)              | 9.05  | 8.17  | 8.05  | 8.40  | 8.32  | 8.75  | 8.66  | 8.56  | 8.74  | 9.31  |
| H <sub>2</sub> O (Water)                          | 13.21 | 9.29  | 9.00  | 9.28  | 10.40 | 12.63 | 12.29 | 11.61 | 12.25 | 14.84 |
| H <sub>2</sub> O <sub>2</sub> (Hydrogen peroxide) | 12.71 | 8.45  | 8.17  | 8.49  | 9.68  | 11.94 | 11.63 | 10.96 | 11.68 | 14.65 |
| H <sub>2</sub> S (Hydrogen sulfide)               | 10.88 | 8.04  | 7.82  | 8.17  | 8.69  | 10.90 | 10.56 | 9.96  | 9.82  | 11.29 |
| HCCCN (Cyanoacetylene)                            | 12.07 | 10.59 | 10.20 | 10.38 | 10.84 | 11.96 | 11.66 | 11.58 | 11.76 | 12.40 |
| HCCF (Fluoroacetylene)                            | 11.90 | 8.75  | 8.41  | 10.00 | 9.39  | 11.65 | 11.36 | 10.77 | 12.09 | 13.79 |
| HCl (Hydrogen sulfide)                            | 13.21 | 9.95  | 9.72  | 10.12 | 10.72 | 12.96 | 12.58 | 11.94 | 12.14 | 13.89 |
| HCN (Hydrogen cyanide)                            | 14.11 | 10.93 | 10.61 | 11.89 | 11.55 | 13.70 | 13.35 | 12.73 | 13.99 | 15.81 |
| HCO (Formyl radical)                              | 9.73  | 7.80  | 7.76  | 7.83  | 8.50  | 9.08  | 8.97  | 8.76  | 9.00  | 9.72  |
| HCOOH (Formic acid)                               | 11.85 | 8.51  | 8.16  | 9.56  | 9.47  | 11.74 | 11.46 | 10.85 | 12.33 | 14.56 |
| He (Helium atom)                                  | 27.20 | 19.95 | 19.95 | 20.87 | 21.92 | 23.76 | 23.47 | 22.80 | 24.26 | 27.17 |
| HF (Hydrogen fluoride)                            | 16.76 | 11.95 | 11.65 | 12.01 | 13.33 | 15.37 | 15.08 | 14.42 | 15.57 | 18.62 |
| Li (Lithium atom)                                 | 4.72  | 4.09  | 4.08  | 4.16  | 4.22  | 4.66  | 4.59  | 4.51  | 4.27  | 4.73  |
| Mg (Magnesium atom)                               | 7.77  | 5.87  | 5.62  | 5.65  | 6.10  | 7.67  | 7.59  | 7.29  | 6.89  | 7.79  |
| N (Nitrogen atom)                                 | 14.81 | 11.52 | 11.39 | 11.74 | 12.08 | 12.75 | 12.69 | 12.54 | 13.19 | 14.25 |
| N <sub>2</sub> (Nitrogen diatomic)                | 18.03 | 14.64 | 14.25 | 14.36 | 14.42 | 16.99 | 16.68 | 15.96 | 16.25 | 18.73 |
| N <sub>2</sub> H <sub>4</sub> (Hydrazine)         | 10.30 | 7.04  | 6.87  | 7.29  | 8.01  | 10.15 | 9.83  | 9.21  | 9.49  | 11.37 |
| N <sub>2</sub> O (Nitrous oxide)                  | 14.82 | 11.15 | 10.79 | 12.50 | 11.83 | 13.81 | 13.54 | 12.99 | 14.12 | 14.65 |
| Na (Sodium atom)                                  | 4.14  | 3.99  | 3.87  | 3.78  | 4.04  | 4.14  | 4.24  | 4.23  | 4.28  | 4.75  |
| NaCl (Sodium Chloride)                            | 8.48  | 6.32  | 6.07  | 6.14  | 6.83  | 8.57  | 8.25  | 7.69  | 7.92  | 9.24  |
| Ne (Neon atom)                                    | 26.78 | 21.35 | 21.04 | 21.55 | 22.93 | 24.07 | 23.90 | 23.45 | 24.94 | 27.87 |
| NF <sub>3</sub> (Nitrogen trifluoride)            | 15.77 | 11.69 | 11.41 | 11.94 | 12.79 | 14.96 | 14.66 | 14.03 | 14.41 | 16.87 |
| NH (Imidogen)                                     | 13.30 | 10.68 | 10.71 | 10.97 | 11.31 | 11.79 | 11.71 | 11.58 | 12.05 | 12.67 |
| NH <sub>2</sub> (Amino radical)                   | 11.42 | 9.59  | 9.69  | 9.81  | 10.14 | 10.50 | 10.39 | 10.25 | 10.55 | 11.09 |
| NH <sub>3</sub> (Ammonia)                         | 11.42 | 8.02  | 7.79  | 8.20  | 8.96  | 11.24 | 10.90 | 10.24 | 10.50 | 12.54 |
| NO (Nitric oxide)                                 | 10.22 | 4.95  | 8.23  | 8.35  | 9.03  | 9.43  | 9.40  | 9.26  | 9.59  | 10.41 |
| NO <sub>2</sub> (Nitrogen dioxide)                | 10.10 | 8.63  | 8.65  | 9.04  | 9.30  | 9.56  | 9.53  | 9.47  | 9.75  | 10.39 |
| O (Oxygen atom)                                   | 12.22 | 9.91  | 10.07 | 10.38 | 10.59 | 10.75 | 10.69 | 10.63 | 10.96 | 11.29 |
| O <sub>2</sub> (Oxygen diatomic)                  | 12.75 | 11.02 | 10.98 | 11.56 | 11.69 | 11.92 | 11.92 | 11.89 | 12.34 | 12.78 |
| O <sub>3</sub> (Ozone)                            | 10.99 | 10.30 | 10.16 | 10.25 | 10.26 | 10.32 | 10.32 | 10.32 | 10.22 | 9.51  |
| OCS (Carbonyl sulfide)                            | 12.07 | 10.88 | 10.51 | 10.83 | 10.27 | 12.16 | 11.88 | 11.39 | 12.02 | 12.16 |
| OH (Hydroxyl radical)                             | 11.36 | 9.44  | 9.52  | 9.61  | 9.96  | 10.10 | 10.05 | 9.99  | 10.34 | 10.96 |
| P (Phosphorus atom)                               | 9.83  | 8.04  | 8.07  | 8.41  | 8.23  | 9.06  | 8.84  | 8.59  | 8.66  | 8.86  |
| P <sub>2</sub> (Phosphorus diatomic)              | 9.98  | 9.36  | 9.19  | 9.50  | 9.28  | 9.60  | 9.58  | 9.53  | 9.58  | 9.51  |
| PF <sub>3</sub> (Phosphorus trifluoride)          | 12.97 | 9.85  | 9.51  | 9.83  | 10.56 | 12.75 | 12.45 | 11.84 | 11.84 | 13.51 |
| PH <sub>3</sub> (Phosphine)                       | 11.05 | 8.33  | 8.15  | 8.58  | 8.98  | 11.10 | 10.82 | 10.28 | 10.06 | 11.30 |

|                                           |       |       |       |       |       |       |       |       |       |       |
|-------------------------------------------|-------|-------|-------|-------|-------|-------|-------|-------|-------|-------|
| S (Sulfur atom)                           | 8.26  | 7.24  | 7.27  | 7.36  | 7.48  | 7.75  | 7.67  | 7.58  | 7.64  | 7.84  |
| S <sub>2</sub> (Sulfur diatomic)          | 8.07  | 7.37  | 7.44  | 7.64  | 7.61  | 7.97  | 7.87  | 7.75  | 7.79  | 7.96  |
| Si (Silicon atom)                         | 6.75  | 4.79  | 5.73  | 5.86  | 5.91  | 6.41  | 6.33  | 6.18  | 6.07  | 6.34  |
| Si <sub>2</sub> H <sub>6</sub> (Disilane) | 11.22 | 8.62  | 8.38  | 9.05  | 9.21  | 11.46 | 11.21 | 10.69 | 10.34 | 11.92 |
| SiF <sub>2</sub> (Silicon difluoride)     | 11.03 | 9.30  | 9.06  | 9.27  | 9.68  | 10.61 | 10.52 | 10.28 | 10.37 | 11.10 |
| SiF <sub>4</sub> (Silicon tetrafluoride)  | 17.72 | 12.96 | 12.66 | 13.42 | 14.27 | 16.57 | 16.30 | 15.68 | 16.33 | 19.08 |
| SiH <sub>3</sub> (Silyl)                  | 8.02  | 6.73  | 6.82  | 7.06  | 7.03  | 7.59  | 7.48  | 7.30  | 7.30  | 7.50  |
| SiH <sub>4</sub> (Silane)                 | 13.45 | 10.05 | 9.89  | 10.64 | 10.93 | 13.30 | 12.98 | 12.39 | 12.24 | 13.78 |
| SiO (Silicon monoxide)                    | 11.50 | 9.60  | 9.36  | 9.55  | 10.13 | 11.31 | 11.17 | 10.87 | 11.06 | 12.29 |
| SO <sub>2</sub> (Sulfur dioxide)          | 11.71 | 10.84 | 10.61 | 10.91 | 11.01 | 11.25 | 11.24 | 11.20 | 11.46 | 11.90 |
| MAE                                       | 6.14  | 2.88  | 2.43  | 2.03  | 0.58  | 0.73  | 1.13  | 0.86  | 0.75  |       |
| MSE                                       | -5.46 | -2.88 | -2.43 | -2.03 | -0.47 | -0.71 | -1.13 | -0.82 | 0.49  |       |
| RMS                                       | 8.08  | 3.14  | 2.70  | 2.22  | 0.82  | 0.94  | 1.30  | 1.01  | 0.95  |       |

Table S8. Fundamental gaps (3) [in eV] of the 121 molecules studied. The reference values are calculated by CCSD.

| Molecule                           | CCSD  | LDA   | PBE   | M06L  | B3LYP | $\omega$ B97 | $\omega$ B97X | $\omega$ B97X-D | M06-2X | M06-HF |
|------------------------------------|-------|-------|-------|-------|-------|--------------|---------------|-----------------|--------|--------|
| Al (Aluminum atom)                 | 5.55  | 0.10  | 0.33  | 0.77  | 1.52  | 5.92         | 5.67          | 5.10            | 3.04   | 1.85   |
| AlCl3 (Aluminum trichloride)       | 12.23 | 5.71  | 5.80  | 6.71  | 7.43  | 12.57        | 12.18         | 11.43           | 9.74   | 12.07  |
| Ar (Argon atom)                    | 18.49 | 11.20 | 10.94 | 12.37 | 12.59 | 18.11        | 17.86         | 17.00           | 15.26  | 17.63  |
| B (Boron atom)                     | 8.02  | 0.18  | 0.55  | 1.61  | 2.48  | 8.04         | 7.60          | 6.67            | 4.74   | 3.66   |
| BCl3 (Borane, trichloro-)          | 12.22 | 4.88  | 5.00  | 5.58  | 6.87  | 12.60        | 12.04         | 11.07           | 9.57   | 12.42  |
| Be (Beryllium atom)                | 9.67  | 3.52  | 3.59  | 4.00  | 4.89  | 9.28         | 9.09          | 8.53            | 6.72   | 8.39   |
| BF3 (Borane, trifluoro-)           | 17.38 | 9.59  | 9.27  | 9.98  | 11.43 | 16.16        | 16.07         | 15.31           | 14.37  | 17.95  |
| C (Carbon atom)                    | 10.02 | 0.07  | 0.52  | 1.44  | 3.05  | 9.37         | 8.75          | 7.59            | 6.13   | 7.69   |
| C2F4 (Tetrafluoroethylene)         | 11.98 | 5.88  | 5.71  | 6.20  | 7.29  | 11.83        | 11.72         | 11.03           | 9.27   | 11.76  |
| C2H2 (Acetylene)                   | 13.33 | 6.80  | 6.79  | 7.32  | 8.14  | 12.05        | 11.83         | 11.20           | 9.78   | 11.63  |
| C2H2O2 (Ethanediol)                | 10.23 | 1.80  | 1.94  | 2.48  | 4.18  | 9.93         | 9.45          | 8.45            | 7.34   | 11.41  |
| C2H4 (Ethylene)                    | 12.32 | 5.61  | 5.62  | 6.05  | 7.26  | 11.45        | 11.26         | 10.61           | 9.11   | 10.85  |
| C2H4O (Ethylene oxide)             | 11.54 | 6.22  | 5.88  | 6.29  | 7.47  | 11.52        | 11.37         | 10.69           | 9.64   | 12.36  |
| C2H4S (Thiirane)                   | 9.80  | 4.39  | 4.41  | 4.85  | 6.00  | 10.13        | 9.93          | 9.27            | 7.70   | 9.66   |
| C2H5N (Aziridine)                  | 10.35 | 5.47  | 5.23  | 5.69  | 6.65  | 10.74        | 10.56         | 9.88            | 8.51   | 10.72  |
| C2H6 (Ethane)                      | 13.46 | 7.94  | 7.75  | 8.30  | 9.20  | 13.31        | 13.11         | 12.41           | 10.96  | 13.10  |
| C2HF3 (Trifluoroethylene)          | 11.05 | 5.39  | 5.43  | 5.92  | 7.03  | 11.00        | 10.87         | 10.23           | 8.83   | 11.02  |
| C2N2 (Cyanogen)                    | 13.80 | 5.83  | 5.85  | 6.34  | 7.66  | 13.33        | 12.81         | 11.84           | 10.56  | 14.03  |
| C3H4 (Cyclopropene)                | 11.66 | 4.92  | 5.00  | 5.53  | 6.70  | 10.75        | 10.58         | 9.95            | 8.52   | 10.33  |
| C3H6 (Cyclopropane)                | 11.56 | 7.09  | 6.74  | 7.10  | 7.98  | 12.02        | 11.83         | 11.15           | 9.59   | 11.48  |
| C3H8 (Propane)                     | 12.83 | 7.44  | 7.29  | 7.85  | 8.74  | 12.80        | 12.61         | 11.93           | 10.46  | 12.49  |
| C3O2 (Carbon suboxide)             | 11.35 | 4.67  | 4.71  | 5.13  | 6.33  | 11.48        | 11.07         | 10.27           | 8.87   | 11.52  |
| C4H2 (Diacetylene)                 | 11.47 | 4.78  | 4.80  | 5.24  | 6.37  | 10.98        | 10.81         | 10.26           | 8.81   | 10.58  |
| C4H4O (Furan)                      | 9.68  | 4.79  | 4.79  | 5.13  | 6.29  | 10.01        | 9.87          | 9.28            | 7.75   | 9.41   |
| C4H6 (Cyclobutene)                 | 11.86 | 5.34  | 5.38  | 5.82  | 6.73  | 10.61        | 10.44         | 9.81            | 8.31   | 10.08  |
| C4N2 (2-Butynedinitrile)           | 11.47 | 4.45  | 4.47  | 4.88  | 6.07  | 11.31        | 10.85         | 9.99            | 8.64   | 11.85  |
| CCl4 (Carbon tetrachloride)        | 12.29 | 4.94  | 4.96  | 5.39  | 6.90  | 12.68        | 12.16         | 11.16           | 9.81   | 12.57  |
| CF2Cl2 (Difluorodichloromethane)   | 13.32 | 6.10  | 6.15  | 6.68  | 8.10  | 13.64        | 13.28         | 12.35           | 10.88  | 13.18  |
| CF2O (Carbonic difluoride)         | 15.97 | 6.63  | 6.74  | 7.50  | 9.21  | 14.57        | 14.41         | 13.63           | 12.32  | 15.36  |
| CF3Br (Bromotrifluoromethane)      | 12.83 | 5.77  | 5.81  | 6.48  | 7.60  | 13.05        | 12.70         | 11.83           | 10.27  | 12.74  |
| CF3Cl (Methane, chlorotrifluoro-)  | 14.15 | 7.23  | 7.27  | 7.92  | 9.27  | 14.41        | 14.15         | 13.33           | 11.75  | 14.06  |
| CF4 (Carbon tetrafluoride)         | 18.11 | 10.68 | 10.21 | 10.81 | 12.38 | 17.11        | 17.05         | 16.26           | 15.27  | 18.85  |
| CFCl3 (Trichloromonofluoromethane) | 12.64 | 5.25  | 5.29  | 5.76  | 7.23  | 12.97        | 12.47         | 11.49           | 10.11  | 12.73  |
| CH2CCH2 (Allene)                   | 10.72 | 5.70  | 5.70  | 6.13  | 7.25  | 11.20        | 11.02         | 10.38           | 8.87   | 10.71  |
| CH2CCl2 (Ethene, 1,1-dichloro-)    | 10.97 | 4.71  | 4.75  | 5.17  | 6.37  | 11.02        | 10.85         | 10.23           | 8.66   | 10.44  |

|                                                         |       |      |      |      |       |       |       |       |       |       |
|---------------------------------------------------------|-------|------|------|------|-------|-------|-------|-------|-------|-------|
| CH <sub>2</sub> CF <sub>2</sub> (Ethene, 1,1-difluoro-) | 11.64 | 5.78 | 5.80 | 6.32 | 7.34  | 11.34 | 11.18 | 10.53 | 9.10  | 11.15 |
| CH <sub>2</sub> CHCHO (Acrolein)                        | 10.58 | 2.83 | 2.93 | 3.47 | 5.13  | 10.77 | 10.31 | 9.35  | 8.25  | 11.33 |
| CH <sub>2</sub> CHCl (Ethene, chloro-)                  | 10.97 | 4.93 | 4.97 | 5.41 | 6.63  | 11.01 | 10.84 | 10.21 | 8.69  | 10.45 |
| CH <sub>2</sub> CHF (Ethene, fluoro-)                   | 11.39 | 5.47 | 5.49 | 5.94 | 7.22  | 11.26 | 11.09 | 10.45 | 9.01  | 10.90 |
| CH <sub>2</sub> Cl <sub>2</sub> (Methylene chloride)    | 12.17 | 5.91 | 5.94 | 6.47 | 7.77  | 12.39 | 12.17 | 11.45 | 9.91  | 12.02 |
| CH <sub>2</sub> CO (Ketene)                             | 10.20 | 3.72 | 3.76 | 4.27 | 5.65  | 10.49 | 10.34 | 9.72  | 8.22  | 10.14 |
| CH <sub>2</sub> F <sub>2</sub> (Methane, difluoro-)     | 14.27 | 8.06 | 7.73 | 8.13 | 9.49  | 13.53 | 13.39 | 12.70 | 11.66 | 14.46 |
| CH <sub>3</sub> (Methyl radical)                        | 9.95  | 1.76 | 2.48 | 3.29 | 4.28  | 10.00 | 9.51  | 8.58  | 6.61  | 6.44  |
| CH <sub>3</sub> CCCH <sub>3</sub> (2-Butyne)            | 10.32 | 5.70 | 5.40 | 5.80 | 6.56  | 10.57 | 10.39 | 9.74  | 8.23  | 10.08 |
| CH <sub>3</sub> CCH (Propyne)                           | 10.94 | 6.33 | 5.99 | 6.37 | 7.15  | 11.21 | 11.01 | 10.35 | 8.85  | 10.74 |
| CH <sub>3</sub> CH <sub>2</sub> Cl (Ethyl chloride)     | 11.64 | 6.39 | 6.29 | 6.82 | 7.72  | 11.95 | 11.73 | 11.03 | 9.54  | 11.60 |
| CH <sub>3</sub> CH <sub>2</sub> OH (Ethanol)            | 11.29 | 5.75 | 5.49 | 6.02 | 7.18  | 11.40 | 11.23 | 10.52 | 9.34  | 11.93 |
| CH <sub>3</sub> Cl (Methyl chloride)                    | 11.90 | 6.33 | 6.23 | 6.79 | 7.75  | 12.08 | 11.86 | 11.15 | 9.67  | 11.77 |
| CH <sub>3</sub> COCl (Acetyl Chloride)                  | 12.14 | 4.72 | 4.79 | 5.41 | 6.90  | 11.98 | 11.82 | 11.13 | 9.84  | 12.08 |
| CH <sub>3</sub> F (Methyl fluoride)                     | 14.04 | 8.01 | 7.67 | 8.14 | 9.40  | 13.48 | 13.34 | 12.64 | 11.60 | 14.23 |
| CH <sub>3</sub> NHCH <sub>3</sub> (Dimethylamine)       | 9.55  | 4.72 | 4.51 | 5.02 | 5.94  | 10.02 | 9.83  | 9.15  | 7.79  | 9.96  |
| CH <sub>3</sub> NO <sub>2</sub> (Methane, nitro-)       | 11.69 | 3.67 | 3.74 | 4.24 | 6.07  | 11.95 | 11.49 | 10.46 | 9.68  | 12.40 |
| CH <sub>3</sub> OCH <sub>3</sub> (Dimethyl ether)       | 10.69 | 5.60 | 5.34 | 5.82 | 6.90  | 10.97 | 10.82 | 10.14 | 8.96  | 11.41 |
| CH <sub>3</sub> OH (Methyl alcohol)                     | 11.57 | 5.85 | 5.59 | 6.12 | 7.29  | 11.52 | 11.35 | 10.64 | 9.49  | 12.12 |
| CH <sub>3</sub> SH (Methanethiol)                       | 9.90  | 4.86 | 4.72 | 5.26 | 6.05  | 10.31 | 10.10 | 9.42  | 7.78  | 9.63  |
| CH <sub>3</sub> SiH <sub>3</sub> (Methyl silane)        | 12.26 | 7.41 | 7.25 | 7.84 | 8.61  | 12.71 | 12.50 | 11.85 | 10.23 | 12.04 |
| CH <sub>4</sub> (Methane)                               | 15.01 | 9.35 | 9.08 | 9.61 | 10.54 | 14.75 | 14.52 | 13.78 | 12.39 | 14.63 |
| CHCl <sub>3</sub> (Chloroform)                          | 12.18 | 5.36 | 5.39 | 5.90 | 7.28  | 12.49 | 12.22 | 11.44 | 9.93  | 12.09 |
| CHF <sub>3</sub> (Methane, trifluoro-)                  | 15.58 | 9.32 | 8.94 | 9.30 | 10.73 | 14.79 | 14.65 | 13.95 | 12.95 | 15.86 |
| CHONH <sub>2</sub> (Formamide)                          | 10.67 | 5.13 | 5.19 | 5.67 | 6.80  | 10.98 | 10.82 | 10.12 | 9.00  | 11.27 |
| Cl (Chlorine atom)                                      | 9.33  | 0.38 | 0.40 | 0.86 | 2.58  | 8.80  | 8.13  | 7.00  | 5.85  | 10.10 |
| Cl <sub>2</sub> (Chlorine diatomic)                     | 11.00 | 3.00 | 3.08 | 3.51 | 5.05  | 10.88 | 10.33 | 9.32  | 8.07  | 11.76 |
| ClF (Chlorine monofluoride)                             | 12.47 | 3.31 | 3.42 | 4.03 | 5.74  | 11.80 | 11.27 | 10.21 | 9.18  | 13.19 |
| ClF <sub>3</sub> (Chlorine trifluoride)                 | 12.05 | 3.05 | 3.14 | 3.65 | 5.51  | 11.51 | 11.03 | 9.98  | 9.18  | 13.79 |
| ClO (Monochlorine monoxide)                             | 8.99  | 0.35 | 0.33 | 0.75 | 2.78  | 8.72  | 8.23  | 7.15  | 5.98  | 10.63 |
| CO (Carbon monoxide)                                    | 15.49 | 6.88 | 7.03 | 7.68 | 9.40  | 15.30 | 14.87 | 13.82 | 12.49 | 15.46 |
| CO <sub>2</sub> (Carbon dioxide)                        | 14.61 | 8.49 | 8.19 | 8.90 | 9.87  | 14.59 | 14.42 | 13.69 | 12.21 | 14.82 |
| CS (Carbon monosulfide)                                 | 11.43 | 3.86 | 3.99 | 4.40 | 6.06  | 11.90 | 11.38 | 10.37 | 8.86  | 12.64 |
| CS <sub>2</sub> (Carbon disulfide)                      | 9.91  | 3.96 | 3.98 | 4.38 | 5.39  | 10.31 | 9.92  | 9.20  | 7.62  | 10.20 |
| F (Fluorine atom)                                       | 14.08 | 0.09 | 1.01 | 2.80 | 4.74  | 11.32 | 10.93 | 9.73  | 10.11 | 16.44 |
| F <sub>2</sub> (Fluorine diatomic)                      | 15.66 | 3.45 | 3.65 | 4.69 | 7.00  | 13.29 | 12.91 | 11.79 | 11.98 | 17.89 |
| F <sub>2</sub> O (Difluorine monoxide)                  | 13.93 | 3.24 | 3.42 | 4.27 | 6.51  | 12.80 | 12.36 | 11.23 | 11.05 | 16.55 |
| FCN (Cyanogen fluoride)                                 | 14.21 | 7.37 | 7.20 | 8.03 | 8.92  | 14.03 | 13.78 | 12.97 | 11.35 | 13.83 |



|                              |       |       |       |        |       |       |       |       |       |        |
|------------------------------|-------|-------|-------|--------|-------|-------|-------|-------|-------|--------|
| H (Hydrogen atom)            | 12.86 | 5.26  | 6.90  | -87.14 | 8.74  | 10.31 | 10.14 | 9.61  | -5.00 | -40.36 |
| H2CO (Formaldehyde)          | 11.43 | 3.42  | 3.58  | 4.23   | 5.90  | 11.33 | 11.20 | 10.24 | 9.11  | 11.96  |
| H2CS (Thioformaldehyde)      | 9.05  | 1.81  | 1.91  | 2.23   | 3.68  | 9.21  | 8.73  | 7.82  | 6.29  | 9.71   |
| H2O (Water)                  | 13.21 | 6.64  | 6.33  | 6.94   | 8.15  | 12.82 | 12.62 | 11.82 | 10.71 | 13.70  |
| H2O2 (Hydrogen peroxide)     | 12.71 | 4.68  | 4.77  | 5.66   | 7.37  | 12.12 | 11.95 | 11.17 | 10.07 | 13.22  |
| H2S (Hydrogen sulfide)       | 10.88 | 5.67  | 5.47  | 6.09   | 6.75  | 11.10 | 10.86 | 10.18 | 8.54  | 10.36  |
| HCCCN (Cyanoacetylene)       | 12.07 | 5.17  | 5.19  | 5.65   | 6.87  | 12.19 | 11.82 | 10.93 | 9.51  | 11.86  |
| HCCF (Fluoroacetylene)       | 11.90 | 6.56  | 6.28  | 6.79   | 7.69  | 11.85 | 11.66 | 10.99 | 9.59  | 11.67  |
| HCl (Hydrogen sulfide)       | 13.21 | 7.10  | 6.94  | 7.64   | 8.50  | 13.15 | 12.88 | 12.13 | 10.64 | 12.82  |
| HCN (Hydrogen cyanide)       | 14.11 | 7.88  | 7.89  | 8.48   | 9.75  | 13.91 | 13.69 | 12.98 | 11.66 | 13.72  |
| HCO (Formyl radical)         | 9.73  | 1.27  | 1.70  | 2.03   | 3.80  | 9.56  | 9.06  | 8.06  | 6.53  | 8.99   |
| HCOOH (Formic acid)          | 11.85 | 5.11  | 5.20  | 5.79   | 7.47  | 11.95 | 11.79 | 11.09 | 10.00 | 12.80  |
| He (Helium atom)             | 27.20 | 17.27 | 17.10 | 17.77  | 19.36 | 24.07 | 23.99 | 23.08 | 22.03 | 25.41  |
| HF (Hydrogen fluoride)       | 16.76 | 9.06  | 8.70  | 9.39   | 10.84 | 15.56 | 15.42 | 14.61 | 13.83 | 17.39  |
| Li (Lithium atom)            | 4.72  | 1.41  | 1.88  | 2.19   | 2.13  | 5.62  | 5.58  | 5.41  | 3.90  | -18.76 |
| Mg (Magnesium atom)          | 7.77  | 3.44  | 3.36  | 3.75   | 4.37  | 7.75  | 7.72  | 7.38  | 5.85  | 7.05   |
| N (Nitrogen atom)            | 14.81 | 3.94  | 4.17  | 5.48   | 6.61  | 13.10 | 12.70 | 11.63 | 10.07 | 11.22  |
| N2 (Nitrogen diatomic)       | 18.03 | 8.21  | 8.31  | 8.86   | 10.95 | 17.18 | 16.66 | 15.54 | 14.58 | 17.98  |
| N2H4 (Hydrazine)             | 10.30 | 4.52  | 4.35  | 4.96   | 5.94  | 10.39 | 10.19 | 9.44  | 8.02  | 10.54  |
| N2O (Nitrous oxide)          | 14.82 | 6.81  | 6.83  | 7.40   | 8.79  | 14.04 | 13.90 | 13.06 | 11.54 | 13.94  |
| Na (Sodium atom)             | 4.14  | 1.13  | 2.04  | 2.14   | 1.78  | 5.08  | 5.17  | 5.10  | 3.98  | -13.04 |
| NaCl (Sodium Chloride)       | 8.48  | 3.38  | 3.01  | 3.36   | 4.28  | 8.80  | 8.60  | 7.90  | 6.12  | 8.31   |
| Ne (Neon atom)               | 26.78 | 16.13 | 15.68 | 17.44  | 18.30 | 24.42 | 24.29 | 23.47 | 22.46 | 26.82  |
| NF3 (Nitrogen trifluoride)   | 15.77 | 7.29  | 7.41  | 8.31   | 10.02 | 15.25 | 15.10 | 14.25 | 12.77 | 15.83  |
| NH (Imidogen)                | 13.30 | 3.02  | 3.60  | 4.63   | 6.06  | 12.38 | 11.88 | 10.81 | 9.48  | 12.17  |
| NH2 (Amino radical)          | 11.42 | 1.96  | 2.68  | 3.78   | 5.11  | 11.31 | 10.73 | 9.65  | 8.34  | 11.79  |
| NH3 (Ammonia)                | 11.42 | 5.73  | 5.46  | 6.02   | 6.99  | 11.45 | 11.22 | 10.46 | 9.13  | 11.57  |
| NO (Nitric oxide)            | 10.22 | 0.38  | 0.28  | 0.71   | 3.00  | 9.18  | 8.64  | 7.48  | 6.59  | 11.75  |
| NO2 (Nitrogen dioxide)       | 10.10 | 1.09  | 1.43  | 1.87   | 3.82  | 9.71  | 9.24  | 8.20  | 7.11  | 11.73  |
| O (Oxygen atom)              | 12.22 | 0.28  | 1.11  | 2.79   | 4.14  | 10.71 | 10.20 | 9.01  | 8.18  | 12.47  |
| O2 (Oxygen diatomic)         | 12.75 | 1.98  | 2.31  | 3.11   | 5.28  | 11.56 | 11.04 | 9.88  | 9.39  | 14.83  |
| O3 (Ozone)                   | 10.99 | 1.72  | 1.79  | 2.06   | 4.08  | 10.05 | 9.55  | 8.49  | 7.55  | 11.41  |
| OCS (Carbonyl sulfide)       | 12.07 | 5.52  | 5.57  | 6.11   | 7.24  | 12.49 | 12.19 | 11.34 | 9.82  | 11.63  |
| OH (Hydroxyl radical)        | 11.36 | 0.14  | 0.93  | 2.30   | 3.98  | 10.46 | 9.92  | 8.74  | 8.17  | 13.19  |
| P (Phosphorus atom)          | 9.83  | 2.15  | 2.56  | 3.02   | 3.87  | 9.42  | 8.87  | 8.01  | 5.82  | 5.88   |
| P2 (Phosphorus diatomic)     | 9.98  | 3.71  | 3.72  | 3.99   | 5.06  | 10.04 | 9.67  | 8.94  | 7.26  | 9.86   |
| PF3 (Phosphorus trifluoride) | 12.97 | 6.47  | 6.48  | 7.06   | 8.24  | 12.93 | 12.75 | 12.00 | 10.32 | 12.55  |
| PH3 (Phosphine)              | 11.05 | 6.22  | 6.05  | 6.61   | 7.22  | 11.30 | 11.12 | 10.49 | 8.79  | 10.41  |

|                              |       |       |       |       |       |       |       |       |       |       |
|------------------------------|-------|-------|-------|-------|-------|-------|-------|-------|-------|-------|
| S (Sulfur atom)              | 8.26  | 0.05  | 0.52  | 0.87  | 2.32  | 8.06  | 7.48  | 6.53  | 4.96  | 7.99  |
| S2 (Sulfur diatomic)         | 8.07  | 1.01  | 1.31  | 1.56  | 2.95  | 8.41  | 7.88  | 6.96  | 5.32  | 8.64  |
| Si (Silicon atom)            | 6.75  | 0.27  | 0.24  | 0.53  | 1.77  | 7.05  | 6.60  | 5.76  | 3.86  | 3.70  |
| Si2H6 (Disilane)             | 11.22 | 6.64  | 6.53  | 7.11  | 7.72  | 11.65 | 11.49 | 10.89 | 9.14  | 10.77 |
| SiF2 (Silicon difluoride)    | 11.03 | 4.09  | 4.11  | 4.49  | 5.74  | 10.95 | 10.57 | 9.76  | 8.09  | 10.74 |
| SiF4 (Silicon tetrafluoride) | 17.72 | 9.69  | 9.49  | 10.35 | 11.74 | 16.73 | 16.58 | 15.80 | 14.78 | 18.32 |
| SiH3 (Silyl)                 | 8.02  | 1.35  | 1.84  | 2.05  | 3.14  | 7.73  | 7.41  | 6.86  | 4.40  | 2.59  |
| SiH4 (Silane)                | 13.45 | 8.22  | 8.06  | 8.72  | 9.39  | 13.49 | 13.28 | 12.60 | 11.02 | 12.83 |
| SiO (Silicon monoxide)       | 11.50 | 4.62  | 4.60  | 5.02  | 6.34  | 11.56 | 11.20 | 10.39 | 8.85  | 11.76 |
| SO2 (Sulfur dioxide)         | 11.71 | 3.58  | 3.61  | 3.90  | 5.62  | 11.34 | 10.87 | 9.89  | 8.69  | 12.83 |
| MAE                          |       | 7.07  | 7.03  | 7.22  | 5.19  | 0.51  | 0.64  | 1.39  | 2.82  | 1.57  |
| MSE                          |       | -7.07 | -7.03 | -7.22 | -5.19 | -0.27 | -0.56 | -1.36 | -2.82 | -0.92 |
| RMS                          |       | 7.32  | 7.25  | 11.25 | 5.35  | 0.77  | 0.93  | 1.61  | 3.21  | 5.66  |

Table S9. Optical gaps [in eV] of the 121 molecules studied. The reference values are calculated by EOM-CCSD.

| Molecule                           | EOM-  |       |       |       |       |              |               |                 |        |        |
|------------------------------------|-------|-------|-------|-------|-------|--------------|---------------|-----------------|--------|--------|
|                                    | CCSD  | LDA   | PBE   | M06L  | B3LYP | $\omega$ B97 | $\omega$ B97X | $\omega$ B97X-D | M06-2X | M06-HF |
| Al (Aluminum atom)                 | 3.16  | 2.78  | 2.73  | 3.16  | 2.77  | 3.27         | 3.22          | 2.99            | 2.67   | 2.28   |
| AlCl3 (Aluminum trichloride)       | 8.13  | 6.46  | 6.52  | 7.35  | 7.03  | 8.12         | 7.89          | 7.64            | 7.43   | 7.31   |
| Ar (Argon atom)                    | 12.35 | 11.26 | 11.04 | 12.40 | 11.37 | 12.13        | 11.95         | 11.84           | 11.82  | 11.46  |
| B (Boron atom)                     | 5.01  | 4.10  | 3.50  | 2.97  | 3.80  | 4.14         | 3.82          | 3.75            | 3.69   | 3.66   |
| BCl3 (Borane, trichloro-)          | 7.48  | 6.40  | 6.46  | 7.05  | 6.88  | 7.61         | 7.42          | 7.21            | 7.16   | 7.01   |
| Be (Beryllium atom)                | 5.33  | 4.88  | 4.90  | 5.10  | 4.88  | 4.98         | 4.90          | 4.88            | 4.75   | 4.37   |
| BF3 (Borane, trifluoro-)           | 12.80 | 10.85 | 10.46 | 10.74 | 11.44 | 12.05        | 12.08         | 11.87           | 12.37  | 12.95  |
| C (Carbon atom)                    | 7.64  | 5.92  | 5.28  | 4.77  | 5.82  | 6.12         | 5.71          | 5.64            | 5.89   | 6.01   |
| C2F4 (Tetrafluoroethylene)         | 7.14  | 6.12  | 5.77  | 6.20  | 6.26  | 7.02         | 6.97          | 6.77            | 6.61   | 6.85   |
| C2H2 (Acetylene)                   | 8.41  | 7.50  | 7.06  | 7.33  | 7.30  | 8.31         | 8.12          | 7.71            | 7.67   | 7.69   |
| C2H2O2 (Ethanedial)                | 3.00  | 2.05  | 2.15  | 2.56  | 2.53  | 2.85         | 2.78          | 2.68            | 2.54   | 2.05   |
| C2H4 (Ethylene)                    | 7.42  | 6.84  | 6.45  | 6.78  | 6.60  | 7.55         | 7.38          | 7.02            | 6.92   | 6.87   |
| C2H4O (Ethylene oxide)             | 7.48  | 6.20  | 5.88  | 6.30  | 6.65  | 7.70         | 7.62          | 7.26            | 7.51   | 7.82   |
| C2H4S (Thiirane)                   | 6.02  | 5.13  | 4.87  | 5.71  | 5.28  | 6.42         | 6.24          | 5.92            | 5.74   | 5.72   |
| C2H5N (Aziridine)                  | 6.37  | 5.49  | 5.25  | 5.70  | 5.72  | 6.74         | 6.59          | 6.24            | 6.15   | 6.39   |
| C2H6 (Ethane)                      | 10.09 | 8.59  | 8.34  | 8.82  | 8.92  | 10.02        | 9.87          | 9.43            | 9.36   | 9.61   |
| C2HF3 (Trifluoroethylene)          | 6.86  | 5.98  | 5.64  | 6.00  | 6.05  | 6.70         | 6.67          | 6.49            | 6.33   | 6.26   |
| C2N2 (Cyanogen)                    | 8.32  | 6.86  | 6.99  | 7.48  | 7.67  | 8.46         | 8.34          | 8.12            | 7.97   | 7.97   |
| C3H4 (Cyclopropene)                | 6.78  | 5.96  | 5.89  | 6.19  | 6.14  | 6.47         | 6.42          | 6.33            | 6.31   | 6.09   |
| C3H6 (Cyclopropane)                | 8.46  | 7.12  | 6.76  | 7.12  | 7.13  | 8.28         | 8.10          | 7.69            | 8.01   | 7.47   |
| C3H8 (Propane)                     | 8.93  | 7.44  | 7.30  | 7.88  | 7.89  | 8.98         | 8.80          | 8.42            | 8.28   | 8.54   |
| C3O2 (Carbon suboxide)             | 7.25  | 7.07  | 6.70  | 7.17  | 6.90  | 7.52         | 7.44          | 7.26            | 7.11   | 6.93   |
| C4H2 (Diacyetylene)                | 8.06  | 7.08  | 6.60  | 6.81  | 6.88  | 8.16         | 8.01          | 7.54            | 7.33   | 7.53   |
| C4H4O (Furan)                      | 6.47  | 6.00  | 5.75  | 5.91  | 5.95  | 6.23         | 6.19          | 6.12            | 6.15   | 6.21   |
| C4H6 (Cyclobutene)                 | 6.77  | 5.99  | 5.66  | 5.99  | 5.93  | 7.04         | 6.86          | 6.47            | 6.31   | 6.41   |
| C4N2 (2-Butynedinitrile)           | 8.25  | 6.02  | 6.19  | 6.74  | 7.21  | 8.47         | 8.31          | 7.99            | 7.91   | 8.10   |
| CCl4 (Carbon tetrachloride)        | 7.27  | 5.07  | 6.06  | 6.43  | 6.73  | 7.24         | 7.16          | 7.04            | 6.88   | 6.61   |
| CF2Cl2 (Difluorodichloromethane)   | 7.43  | 6.43  | 6.45  | 6.99  | 6.85  | 7.38         | 7.29          | 7.17            | 7.05   | 6.76   |
| CF2O (Carbonic difluoride)         | 9.50  | 8.16  | 7.83  | 8.51  | 8.59  | 9.39         | 9.37          | 9.17            | 9.38   | 9.84   |
| CF3Br (Bromotrifluoromethane)      | 8.99  | 6.17  | 6.19  | 6.59  | 6.28  | 6.47         | 8.81          | 8.53            | 8.43   | 8.41   |
| CF3Cl (Methane, chlorotrifluoro-)  | 9.96  | 7.67  | 7.67  | 8.30  | 7.83  | 9.96         | 9.77          | 8.01            | 9.38   | 9.41   |
| CF4 (Carbon tetrafluoride)         | 13.82 | 11.81 | 11.22 | 11.49 | 12.37 | 13.07        | 13.13         | 12.77           | 13.35  | 14.18  |
| CFCl3 (Trichloromonofluoromethane) | 7.12  | 5.83  | 5.85  | 6.31  | 6.42  | 7.08         | 6.98          | 6.82            | 6.74   | 6.56   |
| CH2CCH2 (Allene)                   | 7.13  | 6.50  | 6.15  | 6.50  | 6.41  | 7.39         | 7.21          | 6.87            | 6.74   | 6.79   |

|                                                          |       |       |       |       |       |       |       |       |       |       |
|----------------------------------------------------------|-------|-------|-------|-------|-------|-------|-------|-------|-------|-------|
| CH <sub>2</sub> CCl <sub>2</sub> (Ethene, 1,1-dichloro-) | 6.82  | 5.98  | 5.93  | 5.89  | 6.14  | 6.57  | 6.49  | 6.38  | 6.38  | 6.39  |
| CH <sub>2</sub> CF <sub>2</sub> (Ethene, 1,1-difluoro-)  | 7.32  | 6.49  | 6.09  | 6.45  | 6.44  | 7.34  | 7.22  | 6.90  | 6.81  | 6.93  |
| CH <sub>2</sub> CHCHO (Acrolein)                         | 3.90  | 3.04  | 3.12  | 3.53  | 3.54  | 3.89  | 3.83  | 3.73  | 3.56  | 3.10  |
| CH <sub>2</sub> CHCl (Ethene, chloro-)                   | 6.98  | 6.08  | 6.01  | 6.39  | 6.25  | 6.85  | 6.77  | 6.65  | 6.57  | 6.54  |
| CH <sub>2</sub> CHF (Ethene, fluoro-)                    | 7.36  | 6.60  | 6.19  | 6.53  | 6.47  | 7.43  | 7.28  | 6.91  | 6.82  | 6.86  |
| CH <sub>2</sub> Cl <sub>2</sub> (Methylene chloride)     | 7.23  | 6.10  | 6.11  | 6.61  | 6.57  | 7.19  | 7.09  | 6.94  | 6.82  | 6.72  |
| CH <sub>2</sub> CO (Ketene)                              | 6.12  | 5.71  | 5.35  | 5.76  | 5.60  | 6.35  | 6.23  | 5.98  | 5.84  | 5.75  |
| CH <sub>2</sub> F <sub>2</sub> (Methane, difluoro-)      | 9.75  | 8.06  | 7.73  | 8.16  | 8.53  | 9.38  | 9.33  | 8.97  | 9.17  | 9.80  |
| CH <sub>3</sub> (Methyl radical)                         | 5.91  | 5.10  | 4.92  | 5.24  | 5.20  | 5.89  | 5.78  | 5.45  | 5.34  | 4.83  |
| CH <sub>3</sub> CCCH <sub>3</sub> (2-Butyne)             | 6.74  | 5.69  | 5.39  | 5.81  | 5.75  | 6.87  | 6.68  | 6.32  | 6.16  | 6.24  |
| CH <sub>3</sub> CCH (Propyne)                            | 7.42  | 6.32  | 5.99  | 6.37  | 6.34  | 6.86  | 6.84  | 6.80  | 6.78  | 6.87  |
| CH <sub>3</sub> CH <sub>2</sub> Cl (Ethyl chloride)      | 7.55  | 6.54  | 6.35  | 6.86  | 6.86  | 7.56  | 7.47  | 7.33  | 7.14  | 6.96  |
| CH <sub>3</sub> CH <sub>2</sub> OH (Ethanol)             | 6.83  | 5.77  | 5.52  | 6.02  | 6.13  | 6.94  | 6.84  | 6.57  | 6.65  | 6.86  |
| CH <sub>3</sub> Cl (Methyl chloride)                     | 7.44  | 6.55  | 6.37  | 6.90  | 6.77  | 7.49  | 7.39  | 7.23  | 7.03  | 6.87  |
| CH <sub>3</sub> COCl (Acetyl Chloride)                   | 7.36  | 4.93  | 4.97  | 5.47  | 6.59  | 7.17  | 6.94  | 6.63  | 6.80  | 7.22  |
| CH <sub>3</sub> F (Methyl fluoride)                      | 9.60  | 8.01  | 7.68  | 8.16  | 8.48  | 9.26  | 9.24  | 8.94  | 9.16  | 9.45  |
| CH <sub>3</sub> NHCH <sub>3</sub> (Dimethylamine)        | 5.68  | 4.73  | 4.52  | 5.05  | 5.04  | 6.04  | 5.88  | 5.54  | 5.49  | 5.67  |
| CH <sub>3</sub> NO <sub>2</sub> (Methane, nitro-)        | 4.75  | 3.92  | 3.95  | 4.35  | 6.80  | 6.81  | 6.84  | 6.86  | 6.72  | 6.38  |
| CH <sub>3</sub> OCH <sub>3</sub> (Dimethyl ether)        | 6.88  | 5.59  | 5.34  | 5.86  | 6.05  | 7.10  | 6.97  | 6.62  | 6.80  | 7.34  |
| CH <sub>3</sub> OH (Methyl alcohol)                      | 6.90  | 5.88  | 5.62  | 6.12  | 6.20  | 6.96  | 6.86  | 6.61  | 6.71  | 6.89  |
| CH <sub>3</sub> SH (Methanethiol)                        | 5.57  | 4.93  | 4.77  | 5.29  | 5.04  | 5.69  | 5.60  | 5.45  | 5.20  | 4.96  |
| CH <sub>3</sub> SiH <sub>3</sub> (Methyl silane)         | 8.48  | 7.48  | 7.37  | 7.89  | 7.77  | 8.78  | 8.59  | 8.27  | 7.98  | 7.92  |
| CH <sub>4</sub> (Methane)                                | 10.67 | 9.40  | 9.14  | 9.68  | 9.62  | 10.52 | 10.35 | 9.98  | 9.97  | 10.10 |
| CHCl <sub>3</sub> (Chloroform)                           | 7.19  | 6.05  | 6.06  | 6.55  | 6.60  | 7.20  | 7.11  | 6.97  | 6.85  | 6.63  |
| CHF <sub>3</sub> (Methane, trifluoro-)                   | 11.14 | 9.41  | 9.03  | 9.38  | 9.85  | 10.67 | 10.63 | 10.26 | 10.52 | 11.21 |
| CHONH <sub>2</sub> (Formamide)                           | 5.74  | 5.35  | 5.29  | 5.76  | 5.57  | 5.70  | 5.67  | 5.64  | 5.45  | 4.97  |
| Cl (Chlorine atom)                                       | 9.43  | 8.65  | 8.50  | 9.58  | 8.76  | 9.54  | 9.40  | 9.22  | 8.91  | 8.12  |
| Cl <sub>2</sub> (Chlorine diatomic)                      | 3.95  | 3.41  | 3.47  | 3.83  | 3.59  | 3.86  | 3.79  | 3.71  | 3.59  | 3.42  |
| ClF (Chlorine monofluoride)                              | 4.38  | 7.77  | 7.76  | 4.37  | 8.18  | 4.12  | 8.54  | 8.42  | 3.97  | 3.53  |
| ClF <sub>3</sub> (Chlorine trifluoride)                  | 4.57  | 3.47  | 3.53  | 3.98  | 3.98  | 4.26  | 4.24  | 4.18  | 4.32  | 4.17  |
| ClO (Monochlorine monoxide)                              | 4.93  | 4.57  | 4.47  | 5.00  | 4.71  | 4.79  | 4.84  | 4.88  | 4.62  | 4.33  |
| CO (Carbon monoxide)                                     | 8.62  | 8.19  | 8.24  | 8.61  | 8.39  | 8.57  | 8.52  | 8.47  | 8.20  | 7.86  |
| CO <sub>2</sub> (Carbon dioxide)                         | 11.27 | 10.52 | 9.96  | 10.14 | 10.51 | 11.18 | 11.14 | 10.74 | 10.97 | 11.36 |
| CS (Carbon monosulfide)                                  | 4.96  | 4.63  | 4.70  | 4.95  | 4.76  | 4.90  | 4.87  | 4.83  | 4.39  | 3.80  |
| CS <sub>2</sub> (Carbon disulfide)                       | 6.55  | 6.55  | 6.46  | 7.44  | 6.51  | 3.70  | 3.73  | 3.82  | 7.47  | 7.23  |
| F (Fluorine atom)                                        | 13.68 | 12.29 | 11.99 | 13.12 | 12.60 | 12.89 | 13.08 | 13.13 | 13.21 | 12.95 |
| F <sub>2</sub> (Fluorine diatomic)                       | 4.67  | 4.15  | 4.25  | 4.87  | 4.36  | 4.46  | 4.43  | 4.42  | 4.11  | 12.74 |
| F <sub>2</sub> O (Difluorine monoxide)                   | 7.43  | 6.99  | 7.04  | 7.57  | 7.26  | 7.45  | 7.43  | 7.41  | 7.31  | 6.44  |

|                              |       |       |       |       |       |       |       |       |       |       |
|------------------------------|-------|-------|-------|-------|-------|-------|-------|-------|-------|-------|
| FCN (Cyanogen fluoride)      | 8.38  | 7.64  | 7.41  | 8.09  | 7.65  | 8.18  | 8.12  | 8.02  | 7.93  | 7.58  |
| H (Hydrogen atom)            | 10.86 | 9.38  | 9.63  | 10.47 | 9.86  | 9.92  | 9.88  | 9.86  | 10.16 | 10.50 |
| H2CO (Formaldehyde)          | 7.28  | 6.12  | 5.81  | 6.28  | 6.47  | 7.40  | 7.31  | 6.93  | 7.12  | 7.65  |
| H2CS (Thioformaldehyde)      | 6.01  | 5.30  | 5.03  | 5.43  | 5.37  | 6.22  | 6.23  | 5.90  | 5.72  | 5.84  |
| H2O (Water)                  | 7.67  | 6.72  | 6.42  | 6.94  | 6.93  | 7.57  | 7.48  | 7.26  | 7.46  | 7.58  |
| H2O2 (Hydrogen peroxide)     | 5.76  | 5.23  | 5.22  | 5.82  | 5.42  | 5.68  | 5.63  | 5.59  | 5.32  | 4.51  |
| H2S (Hydrogen sulfide)       | 6.38  | 5.76  | 5.56  | 6.16  | 5.76  | 6.61  | 6.42  | 6.16  | 6.00  | 5.79  |
| HCCCN (Cyanoacetylene)       | 8.49  | 6.88  | 7.02  | 7.57  | 7.62  | 8.57  | 8.41  | 8.08  | 7.97  | 7.94  |
| HCCF (Fluoroacetylene)       | 7.55  | 6.72  | 6.40  | 6.83  | 6.67  | 7.40  | 7.30  | 7.08  | 7.00  | 6.83  |
| HCl (Hydrogen sulfide)       | 7.96  | 7.29  | 7.10  | 7.76  | 7.32  | 8.00  | 7.87  | 7.69  | 7.54  | 7.28  |
| HCN (Hydrogen cyanide)       | 9.25  | 8.65  | 8.68  | 8.98  | 8.99  | 9.40  | 9.33  | 9.24  | 8.96  | 8.65  |
| HCO (Formyl radical)         | 2.22  | 2.04  | 2.22  | 2.55  | 2.32  | 2.29  | 2.28  | 2.29  | 1.92  | 1.17  |
| HCOOH (Formic acid)          | 5.69  | 5.38  | 5.42  | 5.86  | 5.54  | 5.67  | 5.63  | 5.60  | 5.38  | 4.80  |
| He (Helium atom)             | 24.04 | 21.89 | 22.13 | 23.63 | 22.76 | 22.46 | 22.64 | 22.93 | 23.23 | 23.52 |
| HF (Hydrogen fluoride)       | 10.50 | 9.16  | 8.79  | 9.34  | 9.47  | 9.96  | 9.98  | 9.81  | 10.16 | 10.35 |
| Li (Lithium atom)            | 1.84  | 1.99  | 1.99  | 2.05  | 1.98  | 1.98  | 1.87  | 1.83  | 1.94  | 2.23  |
| Mg (Magnesium atom)          | 4.29  | 4.31  | 4.18  | 4.25  | 4.23  | 4.27  | 4.25  | 4.25  | 4.35  | 4.25  |
| N (Nitrogen atom)            | 10.51 | 9.14  | 8.76  | 10.05 | 9.39  | 9.70  | 9.79  | 9.70  | 10.08 | 9.89  |
| N2 (Nitrogen diatomic)       | 13.25 | 11.72 | 11.26 | 11.53 | 12.12 | 12.95 | 12.87 | 12.47 | 12.74 | 12.81 |
| N2H4 (Hydrazine)             | 5.62  | 4.53  | 4.36  | 4.99  | 4.89  | 5.87  | 5.70  | 5.39  | 5.40  | 5.71  |
| N2O (Nitrous oxide)          | 8.68  | 8.31  | 7.96  | 9.52  | 9.59  | 9.98  | 9.98  | 9.84  | 9.79  | 8.03  |
| Na (Sodium atom)             | 2.02  | 2.29  | 2.13  | 1.64  | 2.24  | 1.85  | 1.89  | 1.92  | 2.53  | 2.97  |
| NaCl (Sodium Chloride)       | 4.97  | 3.39  | 3.03  | 3.40  | 3.46  | 5.16  | 4.98  | 4.47  | 4.03  | 4.29  |
| Ne (Neon atom)               | 18.12 | 16.22 | 15.85 | 17.16 | 16.63 | 16.67 | 17.00 | 17.25 | 17.59 | 18.04 |
| NF3 (Nitrogen trifluoride)   | 9.22  | 7.66  | 7.73  | 8.48  | 8.22  | 8.52  | 8.54  | 8.48  | 8.58  | 8.14  |
| NH (Imidogen)                | 3.74  | 3.62  | 3.98  | 4.22  | 3.88  | 3.79  | 3.81  | 3.86  | 3.32  | 2.25  |
| NH2 (Amino radical)          | 2.12  | 1.98  | 2.36  | 2.77  | 2.27  | 2.17  | 2.17  | 2.22  | 1.67  | 0.82  |
| NH3 (Ammonia)                | 6.65  | 5.78  | 5.52  | 6.06  | 5.94  | 6.75  | 6.59  | 6.30  | 6.41  | 6.58  |
| NO (Nitric oxide)            | 6.25  | 5.13  | 4.85  | 4.99  | 5.63  | 6.18  | 6.19  | 5.93  | 6.05  | 6.26  |
| NO2 (Nitrogen dioxide)       | 2.96  | 2.84  | 2.96  | 3.14  | 2.96  | 2.96  | 2.94  | 2.93  | 2.61  | 2.01  |
| O (Oxygen atom)              | 9.99  | 8.99  | 8.97  | 9.90  | 9.35  | 9.85  | 9.83  | 9.69  | 9.25  | 8.27  |
| O2 (Oxygen diatomic)         | 8.84  | 8.08  | 7.64  | 7.84  | 8.52  | 8.59  | 8.57  | 8.57  | 8.56  | 8.17  |
| O3 (Ozone)                   | 5.28  | 5.27  | 5.21  | 5.23  | 5.02  | 4.90  | 4.93  | 4.99  | 4.85  | 4.56  |
| OCS (Carbonyl sulfide)       | 7.54  | 7.18  | 6.94  | 7.69  | 7.11  | 7.80  | 7.67  | 7.49  | 7.26  | 6.80  |
| OH (Hydroxyl radical)        | 4.13  | 3.83  | 4.30  | 4.96  | 4.21  | 4.17  | 4.17  | 4.20  | 3.59  | 2.16  |
| P (Phosphorus atom)          | 7.09  | 6.22  | 6.07  | 7.16  | 6.31  | 7.01  | 6.88  | 6.60  | 6.69  | 6.27  |
| P2 (Phosphorus diatomic)     | 6.66  | 6.16  | 6.10  | 6.24  | 6.10  | 6.20  | 6.21  | 6.20  | 6.18  | 6.10  |
| PF3 (Phosphorus trifluoride) | 8.10  | 7.44  | 7.26  | 7.61  | 7.60  | 7.91  | 7.89  | 7.80  | 7.68  | 7.53  |

|                              |       |       |       |       |       |       |       |       |       |       |
|------------------------------|-------|-------|-------|-------|-------|-------|-------|-------|-------|-------|
| PH3 (Phosphine)              | 6.96  | 6.27  | 6.10  | 6.64  | 6.34  | 7.18  | 7.01  | 6.74  | 6.54  | 6.32  |
| S (Sulfur atom)              | 7.00  | 6.56  | 6.46  | 7.23  | 6.58  | 7.36  | 7.19  | 6.96  | 6.22  | 4.94  |
| S2 (Sulfur diatomic)         | 4.75  | 4.47  | 4.51  | 4.64  | 4.69  | 4.46  | 4.55  | 4.63  | 4.66  | 4.60  |
| Si (Silicon atom)            | 4.99  | 4.39  | 4.29  | 4.95  | 4.44  | 5.05  | 4.94  | 4.68  | 4.59  | 4.36  |
| Si2H6 (Disilane)             | 7.62  | 7.08  | 6.93  | 7.40  | 7.28  | 7.63  | 7.56  | 7.49  | 7.30  | 7.20  |
| SiF2 (Silicon difluoride)    | 5.67  | 5.35  | 5.31  | 5.55  | 5.48  | 5.51  | 5.51  | 5.48  | 5.45  | 5.23  |
| SiF4 (Silicon tetrafluoride) | 13.27 | 10.89 | 10.63 | 11.31 | 11.71 | 12.49 | 12.48 | 12.28 | 12.74 | 13.38 |
| SiH3 (Silyl)                 | 5.42  | 4.64  | 4.78  | 5.10  | 4.95  | 5.00  | 5.00  | 5.07  | 4.90  | 3.19  |
| SiH4 (Silane)                | 9.49  | 8.29  | 8.13  | 8.78  | 8.57  | 9.50  | 9.32  | 8.97  | 8.84  | 8.67  |
| SiO (Silicon monoxide)       | 5.62  | 5.25  | 5.19  | 5.48  | 5.39  | 5.65  | 5.59  | 5.51  | 5.47  | 5.49  |
| SO2 (Sulfur dioxide)         | 4.44  | 4.14  | 4.12  | 4.29  | 4.17  | 4.28  | 4.25  | 4.20  | 4.03  | 3.67  |
| MAE                          |       | 0.97  | 1.12  | 0.70  | 0.76  | 0.31  | 0.32  | 0.46  | 0.46  | 0.68  |
| MSE                          |       | -0.91 | -1.05 | -0.61 | -0.63 | -0.13 | -0.15 | -0.33 | -0.38 | -0.44 |
| RMS                          |       | 1.15  | 1.29  | 0.90  | 0.92  | 0.55  | 0.63  | 0.71  | 0.54  | 1.05  |

Table S10. Exciton binding energies (1) [in eV] of the 121 molecules studied. The reference values are the differences between the CCSD fundamental gaps and the EOM-CCSD optical gaps.

| Molecule                           | Ref. | LDA  | PBE  | M06L | B3LYP | $\omega$ B97 | $\omega$ B97X | $\omega$ B97X-D | M06-2X | M06-HF |
|------------------------------------|------|------|------|------|-------|--------------|---------------|-----------------|--------|--------|
| Al (Aluminum atom)                 | 2.39 | 2.66 | 2.76 | 2.40 | 2.79  | 2.41         | 2.45          | 2.63            | 2.80   | 3.22   |
| AlCl3 (Aluminum trichloride)       | 4.11 | 4.24 | 4.05 | 4.11 | 4.04  | 4.36         | 4.31          | 4.20            | 4.36   | 4.52   |
| Ar (Argon atom)                    | 6.14 | 7.30 | 7.25 | 6.54 | 6.99  | 6.54         | 6.67          | 6.67            | 6.50   | 6.46   |
| B (Boron atom)                     | 3.01 | 3.86 | 4.55 | 5.37 | 4.48  | 4.13         | 4.45          | 4.45            | 4.38   | 4.30   |
| BCl3 (Borane, trichloro-)          | 4.74 | 4.59 | 4.36 | 4.27 | 4.41  | 4.52         | 4.50          | 4.49            | 4.66   | 5.08   |
| Be (Beryllium atom)                | 4.34 | 4.21 | 4.09 | 4.04 | 4.30  | 4.38         | 4.32          | 4.20            | 4.61   | 5.08   |
| BF3 (Borane, trifluoro-)           | 4.58 | 4.59 | 4.58 | 4.59 | 4.41  | 4.64         | 4.44          | 4.48            | 4.51   | 4.75   |
| C (Carbon atom)                    | 2.38 | 3.99 | 4.68 | 5.32 | 4.35  | 4.03         | 4.45          | 4.48            | 4.16   | 4.05   |
| C2F4 (Tetrafluoroethylene)         | 4.84 | 5.11 | 5.09 | 5.47 | 5.03  | 4.66         | 4.73          | 4.85            | 5.22   | 5.74   |
| C2H2 (Acetylene)                   | 4.92 | 4.84 | 4.73 | 4.30 | 4.48  | 3.60         | 3.82          | 4.21            | 4.32   | 5.82   |
| C2H2O2 (Ethanediol)                | 7.23 | 6.92 | 6.78 | 6.66 | 6.88  | 7.05         | 7.03          | 6.99            | 7.33   | 8.31   |
| C2H4 (Ethylene)                    | 4.90 | 4.73 | 4.62 | 4.29 | 4.57  | 3.57         | 3.76          | 4.27            | 4.35   | 5.37   |
| C2H4O (Ethylene oxide)             | 4.06 | 5.04 | 4.97 | 4.80 | 4.39  | 3.61         | 3.66          | 3.93            | 4.04   | 3.95   |
| C2H4S (Thiirane)                   | 3.79 | 4.61 | 4.49 | 3.93 | 4.23  | 3.25         | 3.44          | 3.69            | 4.10   | 4.19   |
| C2H5N (Aziridine)                  | 3.98 | 4.84 | 4.73 | 4.55 | 4.42  | 3.66         | 3.77          | 4.03            | 4.31   | 3.95   |
| C2H6 (Ethane)                      | 3.37 | 3.89 | 3.98 | 4.06 | 3.83  | 3.23         | 3.31          | 3.59            | 3.78   | 3.53   |
| C2HF3 (Trifluoroethylene)          | 4.19 | 4.83 | 4.71 | 5.49 | 4.63  | 4.11         | 4.17          | 4.30            | 5.71   | 6.10   |
| C2N2 (Cyanogen)                    | 5.48 | 6.32 | 6.00 | 5.63 | 5.36  | 4.87         | 4.92          | 5.08            | 5.50   | 5.72   |
| C3H4 (Cyclopropene)                | 4.88 | 4.56 | 4.25 | 4.99 | 4.13  | 3.96         | 4.01          | 4.03            | 4.18   | 5.70   |
| C3H6 (Cyclopropane)                | 3.09 | 4.46 | 4.42 | 4.36 | 4.18  | 3.32         | 3.47          | 3.81            | 3.56   | 3.84   |
| C3H8 (Propane)                     | 3.90 | 4.16 | 4.18 | 4.13 | 4.10  | 3.65         | 3.73          | 3.91            | 4.14   | 3.98   |
| C3O2 (Carbon suboxide)             | 4.10 | 4.63 | 4.82 | 4.43 | 4.53  | 4.18         | 4.28          | 4.43            | 4.66   | 4.56   |
| C4H2 (Diacetylene)                 | 3.42 | 3.75 | 3.97 | 4.05 | 3.82  | 2.52         | 2.66          | 3.44            | 3.85   | 3.92   |
| C4H4O (Furan)                      | 3.20 | 3.71 | 3.51 | 3.48 | 3.35  | 3.28         | 3.32          | 3.33            | 4.36   | 4.53   |
| C4H6 (Cyclobutene)                 | 5.09 | 4.19 | 4.14 | 4.24 | 3.95  | 3.04         | 3.22          | 3.56            | 4.36   | 5.56   |
| C4N2 (2-Butynedinitrile)           | 3.22 | 4.53 | 4.23 | 3.83 | 3.35  | 2.47         | 2.56          | 2.78            | 3.13   | 3.23   |
| CCl4 (Carbon tetrachloride)        | 5.03 | 5.35 | 4.25 | 4.44 | 4.20  | 5.11         | 4.91          | 4.62            | 5.00   | 6.03   |
| CF2Cl2 (Difluorodichloromethane)   | 5.89 | 5.72 | 5.47 | 5.56 | 5.56  | 6.13         | 6.04          | 5.87            | 6.11   | 6.47   |
| CF2O (Carbonic difluoride)         | 6.47 | 6.19 | 6.09 | 5.91 | 5.67  | 5.30         | 5.29          | 5.40            | 5.79   | 5.74   |
| CF3Br (Bromotrifluoromethane)      | 3.84 | 6.25 | 5.91 | 5.70 | 6.14  | 6.34         | 3.95          | 4.11            | 4.26   | 4.58   |
| CF3Cl (Methane, chlorotrifluoro-)  | 4.18 | 5.96 | 5.62 | 5.62 | 5.91  | 4.26         | 4.40          | 6.06            | 4.83   | 4.66   |
| CF4 (Carbon tetrafluoride)         | 4.30 | 4.14 | 4.34 | 4.95 | 4.17  | 4.28         | 4.19          | 4.35            | 4.39   | 4.52   |
| CFCl3 (Trichloromonofluoromethane) | 5.53 | 5.23 | 5.05 | 5.25 | 5.02  | 5.66         | 5.52          | 5.32            | 5.60   | 6.40   |
| CH2CCH2 (Allene)                   | 3.59 | 4.37 | 4.30 | 4.16 | 4.12  | 3.31         | 3.50          | 3.80            | 4.32   | 3.81   |
| CH2CCl2 (Ethene, 1,1-dichloro-)    | 4.15 | 4.53 | 3.97 | 4.71 | 3.98  | 3.98         | 4.00          | 3.99            | 4.11   | 4.03   |

|                                                         |       |       |       |       |       |       |       |       |       |      |
|---------------------------------------------------------|-------|-------|-------|-------|-------|-------|-------|-------|-------|------|
| CH <sub>2</sub> CF <sub>2</sub> (Ethene, 1,1-difluoro-) | 4.32  | 4.73  | 4.65  | 4.39  | 4.52  | 3.75  | 3.90  | 4.17  | 4.43  | 5.58 |
| CH <sub>2</sub> CHCHO (Acrolein)                        | 6.68  | 6.83  | 6.63  | 6.39  | 6.39  | 6.27  | 6.27  | 6.32  | 6.65  | 7.33 |
| CH <sub>2</sub> CHCl (Ethene, chloro-)                  | 4.00  | 5.03  | 4.22  | 4.72  | 4.11  | 3.81  | 3.85  | 3.87  | 4.80  | 5.03 |
| CH <sub>2</sub> CHF (Ethene, fluoro-)                   | 4.03  | 4.65  | 4.59  | 5.25  | 5.34  | 3.57  | 3.74  | 4.06  | 5.32  | 5.55 |
| CH <sub>2</sub> Cl <sub>2</sub> (Methylene chloride)    | 4.95  | 5.09  | 4.88  | 4.93  | 5.02  | 5.10  | 5.08  | 5.03  | 5.29  | 5.33 |
| CH <sub>2</sub> CO (Ketene)                             | 4.08  | 4.83  | 4.77  | 4.42  | 4.57  | 3.97  | 4.09  | 4.30  | 4.83  | 5.25 |
| CH <sub>2</sub> F <sub>2</sub> (Methane, difluoro-)     | 4.53  | 5.05  | 5.07  | 5.03  | 4.90  | 4.39  | 4.42  | 4.65  | 4.87  | 4.73 |
| CH <sub>3</sub> (Methyl radical)                        | 4.04  | 4.63  | 5.05  | 4.84  | 4.71  | 4.04  | 4.12  | 4.42  | 4.52  | 4.83 |
| CH <sub>3</sub> CCCH <sub>3</sub> (2-Butyne)            | 3.57  | 4.23  | 4.20  | 3.96  | 4.60  | 3.21  | 3.40  | 3.69  | 4.04  | 4.33 |
| CH <sub>3</sub> CCH (Propyne)                           | 3.52  | 4.62  | 4.56  | 4.35  | 4.33  | 3.98  | 4.00  | 3.99  | 4.12  | 4.36 |
| CH <sub>3</sub> CH <sub>2</sub> Cl (Ethyl chloride)     | 4.09  | 5.09  | 4.63  | 4.72  | 4.45  | 4.14  | 4.20  | 4.23  | 4.52  | 4.48 |
| CH <sub>3</sub> CH <sub>2</sub> OH (Ethanol)            | 4.45  | 4.98  | 4.98  | 4.85  | 4.75  | 4.32  | 4.37  | 4.52  | 4.63  | 4.44 |
| CH <sub>3</sub> Cl (Methyl chloride)                    | 4.46  | 5.14  | 5.04  | 4.89  | 4.87  | 4.47  | 4.54  | 4.62  | 4.93  | 5.81 |
| CH <sub>3</sub> COCl (Acetyl Chloride)                  | 4.78  | 6.35  | 6.01  | 5.81  | 4.64  | 4.45  | 4.63  | 4.83  | 5.04  | 5.55 |
| CH <sub>3</sub> F (Methyl fluoride)                     | 4.44  | 5.40  | 5.42  | 5.23  | 5.02  | 4.53  | 4.52  | 4.72  | 4.76  | 4.66 |
| CH <sub>3</sub> NHCH <sub>3</sub> (Dimethylamine)       | 3.87  | 4.68  | 4.59  | 4.32  | 4.28  | 3.60  | 3.73  | 3.96  | 4.11  | 3.96 |
| CH <sub>3</sub> NO <sub>2</sub> (Methane, nitro-)       | 6.94  | 7.28  | 6.98  | 6.84  | 4.59  | 5.37  | 5.27  | 5.08  | 5.34  | 6.09 |
| CH <sub>3</sub> OCH <sub>3</sub> (Dimethyl ether)       | 3.81  | 4.81  | 4.75  | 4.52  | 4.31  | 3.60  | 3.69  | 3.94  | 3.90  | 3.29 |
| CH <sub>3</sub> OH (Methyl alcohol)                     | 4.67  | 5.47  | 5.40  | 5.09  | 5.07  | 4.61  | 4.66  | 4.81  | 4.91  | 4.79 |
| CH <sub>3</sub> SH (Methanethiol)                       | 4.33  | 4.93  | 4.79  | 4.68  | 4.68  | 4.30  | 4.40  | 4.49  | 4.77  | 4.79 |
| CH <sub>3</sub> SiH <sub>3</sub> (Methyl silane)        | 3.78  | 4.27  | 4.21  | 4.13  | 4.17  | 4.04  | 4.15  | 4.30  | 4.21  | 4.49 |
| CH <sub>4</sub> (Methane)                               | 4.34  | 5.28  | 5.26  | 5.11  | 5.04  | 4.35  | 4.50  | 4.80  | 4.94  | 4.79 |
| CHCl <sub>3</sub> (Chloroform)                          | 4.99  | 4.85  | 4.68  | 4.78  | 4.66  | 5.09  | 4.99  | 4.83  | 5.12  | 5.44 |
| CHF <sub>3</sub> (Methane, trifluoro-)                  | 4.44  | 4.90  | 4.92  | 4.92  | 4.80  | 4.36  | 4.37  | 5.51  | 4.76  | 4.69 |
| CHONH <sub>2</sub> (Formamide)                          | 4.93  | 5.47  | 5.12  | 5.83  | 4.95  | 5.01  | 5.00  | 4.94  | 6.56  | 7.29 |
| Cl (Chlorine atom)                                      | -0.11 | 0.77  | 0.82  | -0.30 | 0.64  | -0.15 | -0.02 | 0.17  | 0.48  | 1.32 |
| Cl <sub>2</sub> (Chlorine diatomic)                     | 7.05  | 7.00  | 6.83  | 6.90  | 6.93  | 7.10  | 7.09  | 7.08  | 7.35  | 7.61 |
| ClF (Chlorine monofluoride)                             | 8.09  | 4.18  | 4.03  | 7.83  | 3.88  | 8.17  | 3.74  | 3.86  | 8.57  | 9.19 |
| ClF <sub>3</sub> (Chlorine trifluoride)                 | 7.48  | 7.58  | 7.40  | 7.29  | 7.38  | 7.44  | 7.44  | 7.45  | 7.68  | 8.30 |
| ClO (Monochlorine monoxide)                             | 4.07  | 4.31  | 4.33  | 3.92  | 4.27  | 4.21  | 4.17  | 4.13  | 4.35  | 4.74 |
| CO (Carbon monoxide)                                    | 6.87  | 6.89  | 6.53  | 6.22  | 6.79  | 7.13  | 7.12  | 6.90  | 7.24  | 8.12 |
| CO <sub>2</sub> (Carbon dioxide)                        | 3.34  | 4.22  | 4.35  | 4.75  | 3.95  | 3.72  | 3.70  | 4.01  | 3.92  | 3.66 |
| CS (Carbon monosulfide)                                 | 6.47  | 6.75  | 6.49  | 6.27  | 6.57  | 7.77  | 7.72  | 6.56  | 7.04  | 7.84 |
| CS <sub>2</sub> (Carbon disulfide)                      | 3.35  | 3.66  | 3.54  | 2.83  | 3.40  | 7.53  | 6.12  | 6.12  | 2.62  | 2.71 |
| F (Fluorine atom)                                       | 0.40  | 1.61  | 2.02  | 1.01  | 1.61  | 1.13  | 1.00  | 1.00  | 1.01  | 1.21 |
| F <sub>2</sub> (Fluorine diatomic)                      | 10.99 | 10.71 | 10.43 | 10.20 | 10.76 | 10.73 | 10.83 | 10.88 | 11.64 | 3.41 |
| F <sub>2</sub> O (Difluorine monoxide)                  | 6.50  | 5.94  | 5.73  | 5.64  | 6.06  | 6.10  | 6.16  | 6.18  | 6.77  | 8.20 |
| FCN (Cyanogen fluoride)                                 | 5.83  | 6.48  | 6.32  | 6.13  | 6.22  | 5.99  | 6.04  | 6.08  | 6.35  | 6.79 |



|                                                   |      |       |       |      |      |       |      |      |      |       |
|---------------------------------------------------|------|-------|-------|------|------|-------|------|------|------|-------|
| H (Hydrogen atom)                                 | 2.01 | 2.81  | 3.27  | 2.65 | 2.90 | 3.08  | 3.03 | 3.01 | 2.80 | 2.38  |
| H <sub>2</sub> CO (Formaldehyde)                  | 4.16 | 5.32  | 5.43  | 5.22 | 4.83 | 4.45  | 4.11 | 4.74 | 4.69 | 4.42  |
| H <sub>2</sub> CS (Thioformaldehyde)              | 3.05 | 3.70  | 3.80  | 3.55 | 3.49 | 2.62  | 2.64 | 3.02 | 3.32 | 3.37  |
| H <sub>2</sub> O (Water)                          | 5.54 | 6.96  | 6.76  | 6.29 | 6.28 | 5.84  | 5.87 | 6.01 | 5.90 | 5.83  |
| H <sub>2</sub> O <sub>2</sub> (Hydrogen peroxide) | 6.95 | 6.82  | 6.48  | 6.24 | 6.79 | 6.79  | 6.80 | 6.73 | 7.46 | 8.70  |
| H <sub>2</sub> S (Hydrogen sulfide)               | 4.50 | 5.31  | 5.17  | 4.97 | 5.05 | 4.41  | 4.61 | 4.83 | 5.02 | 5.05  |
| HCCCN (Cyanoacetylene)                            | 3.58 | 4.93  | 4.54  | 4.18 | 4.06 | 3.47  | 3.49 | 3.83 | 4.17 | 4.44  |
| HCCF (Fluoroacetylene)                            | 4.36 | 5.26  | 5.11  | 5.91 | 4.98 | 4.37  | 4.50 | 4.68 | 6.11 | 6.54  |
| HCl (Hydrogen sulfide)                            | 5.26 | 6.14  | 5.95  | 5.66 | 5.82 | 5.37  | 5.49 | 5.62 | 5.84 | 6.00  |
| HCN (Hydrogen cyanide)                            | 4.86 | 5.99  | 5.41  | 5.79 | 5.06 | 4.63  | 4.71 | 4.78 | 6.13 | 6.75  |
| HCO (Formyl radical)                              | 7.51 | 7.54  | 7.49  | 7.25 | 7.61 | 7.67  | 7.66 | 7.64 | 7.95 | 8.82  |
| HCOOH (Formic acid)                               | 6.15 | 6.54  | 6.03  | 6.41 | 6.09 | 6.21  | 6.21 | 6.14 | 7.45 | 8.47  |
| He (Helium atom)                                  | 3.16 | 4.95  | 4.66  | 3.70 | 4.55 | 4.84  | 4.61 | 4.28 | 3.96 | 3.50  |
| HF (Hydrogen fluoride)                            | 6.27 | 8.19  | 7.97  | 7.37 | 7.31 | 6.97  | 6.87 | 6.96 | 6.70 | 6.53  |
| Li (Lithium atom)                                 | 2.89 | 2.96  | 3.08  | 2.53 | 3.09 | 2.95  | 2.95 | 3.03 | 2.94 | 3.19  |
| Mg (Magnesium atom)                               | 3.48 | 3.53  | 3.45  | 3.48 | 3.57 | 3.70  | 3.63 | 3.44 | 3.68 | 3.72  |
| N (Nitrogen atom)                                 | 4.29 | 5.51  | 5.69  | 4.84 | 5.03 | 4.90  | 4.86 | 4.99 | 4.59 | 4.44  |
| N <sub>2</sub> (Nitrogen diatomic)                | 4.78 | 5.58  | 5.78  | 5.71 | 5.17 | 4.84  | 4.89 | 5.16 | 5.03 | 6.08  |
| N <sub>2</sub> H <sub>4</sub> (Hydrazine)         | 4.68 | 5.35  | 5.29  | 5.16 | 5.06 | 4.42  | 4.53 | 4.72 | 4.94 | 4.74  |
| N <sub>2</sub> O (Nitrous oxide)                  | 6.14 | 6.01  | 5.91  | 5.23 | 4.33 | 4.27  | 4.25 | 4.35 | 5.04 | 6.68  |
| Na (Sodium atom)                                  | 2.12 | 2.53  | 2.68  | 2.37 | 2.61 | 2.49  | 2.42 | 2.53 | 2.08 | 2.12  |
| NaCl (Sodium Chloride)                            | 3.51 | 5.52  | 5.49  | 5.43 | 5.05 | 3.45  | 3.65 | 4.13 | 4.64 | 4.09  |
| Ne (Neon atom)                                    | 8.66 | 10.93 | 10.73 | 9.49 | 9.98 | 10.42 | 9.90 | 9.56 | 8.79 | 8.21  |
| NF <sub>3</sub> (Nitrogen trifluoride)            | 6.55 | 6.95  | 6.55  | 6.49 | 6.64 | 6.87  | 6.83 | 6.76 | 6.83 | 7.41  |
| NH (Imidogen)                                     | 9.56 | 9.53  | 9.25  | 9.16 | 9.34 | 9.47  | 9.46 | 9.43 | 9.99 | 11.02 |
| NH <sub>2</sub> (Amino radical)                   | 9.30 | 9.21  | 8.97  | 8.58 | 9.24 | 9.35  | 9.26 | 9.19 | 9.62 | 10.38 |
| NH <sub>3</sub> (Ammonia)                         | 4.77 | 5.99  | 5.82  | 5.38 | 5.47 | 4.84  | 4.96 | 5.18 | 5.15 | 4.96  |
| NO (Nitric oxide)                                 | 3.97 | 5.04  | 5.17  | 5.20 | 4.70 | 4.11  | 4.14 | 4.40 | 4.34 | 4.40  |
| NO <sub>2</sub> (Nitrogen dioxide)                | 7.14 | 7.04  | 7.01  | 7.08 | 7.30 | 7.29  | 7.33 | 7.37 | 7.73 | 8.54  |
| O (Oxygen atom)                                   | 2.23 | 3.01  | 3.32  | 2.48 | 3.11 | 2.48  | 2.49 | 2.64 | 3.01 | 4.16  |
| O <sub>2</sub> (Oxygen diatomic)                  | 3.91 | 4.59  | 5.02  | 5.23 | 4.45 | 4.36  | 4.41 | 4.46 | 4.58 | 4.96  |
| O <sub>3</sub> (Ozone)                            | 5.71 | 5.57  | 5.49  | 5.46 | 5.69 | 5.84  | 5.80 | 5.75 | 6.05 | 6.70  |
| OCS (Carbonyl sulfide)                            | 4.53 | 5.35  | 5.30  | 4.84 | 4.89 | 4.46  | 4.59 | 4.74 | 5.33 | 5.69  |
| OH (Hydroxyl radical)                             | 7.24 | 7.39  | 7.03  | 6.45 | 7.28 | 7.24  | 7.24 | 7.22 | 7.84 | 9.14  |
| P (Phosphorus atom)                               | 2.74 | 3.30  | 3.54  | 2.80 | 3.12 | 2.66  | 2.70 | 2.94 | 2.77 | 2.92  |
| P <sub>2</sub> (Phosphorus diatomic)              | 3.32 | 4.00  | 3.83  | 3.77 | 3.72 | 3.43  | 3.99 | 4.00 | 3.73 | 3.72  |
| PF <sub>3</sub> (Phosphorus trifluoride)          | 4.87 | 5.05  | 4.84  | 4.84 | 4.90 | 5.01  | 5.01 | 4.98 | 5.13 | 5.48  |
| PH <sub>3</sub> (Phosphine)                       | 4.09 | 4.83  | 4.72  | 4.63 | 4.64 | 3.94  | 4.14 | 4.38 | 4.53 | 4.37  |

|                              |      |      |      |      |      |      |      |      |      |      |
|------------------------------|------|------|------|------|------|------|------|------|------|------|
| S (Sulfur atom)              | 1.26 | 1.65 | 1.80 | 1.00 | 1.78 | 1.01 | 1.15 | 1.37 | 2.10 | 3.38 |
| S2 (Sulfur diatomic)         | 3.32 | 3.53 | 3.60 | 3.66 | 3.46 | 3.86 | 3.69 | 3.56 | 3.50 | 3.45 |
| Si (Silicon atom)            | 1.76 | 2.39 | 2.41 | 1.72 | 2.33 | 1.80 | 1.89 | 2.12 | 2.13 | 2.40 |
| Si2H6 (Disilane)             | 3.60 | 3.77 | 3.65 | 3.78 | 3.55 | 3.53 | 3.59 | 3.59 | 3.80 | 3.83 |
| SiF2 (Silicon difluoride)    | 5.37 | 5.46 | 5.21 | 5.20 | 5.31 | 5.47 | 5.42 | 5.37 | 5.41 | 5.61 |
| SiF4 (Silicon tetrafluoride) | 4.45 | 4.34 | 4.29 | 4.57 | 4.16 | 4.49 | 4.37 | 4.28 | 4.44 | 4.87 |
| SiH3 (Silyl)                 | 2.59 | 3.15 | 3.23 | 3.03 | 3.04 | 2.98 | 2.97 | 2.88 | 3.18 | 4.77 |
| SiH4 (Silane)                | 3.96 | 4.39 | 4.39 | 4.46 | 4.33 | 3.91 | 4.01 | 4.21 | 4.33 | 4.45 |
| SiO (Silicon monoxide)       | 5.88 | 6.11 | 5.89 | 5.77 | 5.86 | 5.87 | 5.89 | 5.89 | 6.03 | 6.23 |
| SO2 (Sulfur dioxide)         | 7.27 | 7.36 | 7.19 | 7.14 | 7.25 | 7.26 | 7.29 | 7.32 | 7.63 | 8.19 |
| MAE                          | 0.66 | 0.66 | 0.57 | 0.53 | 0.39 | 0.38 | 0.40 | 0.40 | 0.48 | 0.80 |
| MSE                          | 0.52 | 0.42 | 0.32 | 0.24 | 0.04 | 0.01 | 0.12 | 0.12 | 0.36 | 0.62 |
| RMS                          | 0.88 | 0.88 | 0.74 | 0.78 | 0.71 | 0.71 | 0.71 | 0.71 | 0.61 | 1.16 |

Table S11. Exciton binding energies (2) [in eV] of the 121 molecules studied. The reference values are the differences between the CCSD fundamental gaps and the EOM-CCSD optical gaps.

| Molecule                           | Ref. | LDA  | PBE  | M06L | B3LYP | $\omega$ B97 | $\omega$ B97X | $\omega$ B97X-D | M06-2X | M06-HF |
|------------------------------------|------|------|------|------|-------|--------------|---------------|-----------------|--------|--------|
| Al (Aluminum atom)                 | 2.39 | 1.51 | 1.62 | 1.45 | 1.77  | 2.01         | 1.99          | 2.03            | 2.08   | 2.78   |
| AlCl3 (Aluminum trichloride)       | 4.11 | 3.10 | 2.89 | 2.84 | 3.17  | 4.22         | 4.02          | 3.72            | 3.96   | 4.95   |
| Ar (Argon atom)                    | 6.14 | 3.78 | 3.84 | 3.08 | 4.61  | 5.66         | 5.42          | 4.80            | 5.12   | 6.84   |
| B (Boron atom)                     | 3.01 | 1.79 | 2.45 | 3.23 | 2.68  | 3.20         | 3.40          | 3.18            | 3.14   | 3.39   |
| BCl3 (Borane, trichloro-)          | 4.74 | 4.02 | 3.33 | 3.13 | 3.99  | 4.07         | 4.08          | 4.13            | 4.52   | 5.27   |
| Be (Beryllium atom)                | 4.34 | 2.18 | 2.02 | 1.96 | 2.58  | 4.20         | 4.05          | 3.68            | 3.41   | 4.77   |
| BF3 (Borane, trifluoro-)           | 4.58 | 1.59 | 1.64 | 1.44 | 2.34  | 4.01         | 3.64          | 3.26            | 3.59   | 5.89   |
| C (Carbon atom)                    | 2.38 | 2.02 | 2.70 | 3.59 | 2.66  | 2.88         | 3.20          | 3.07            | 2.96   | 3.29   |
| C2F4 (Tetrafluoroethylene)         | 4.84 | 2.62 | 2.33 | 2.90 | 3.27  | 4.64         | 4.43          | 4.03            | 4.26   | 6.51   |
| C2H2 (Acetylene)                   | 4.92 | 1.29 | 1.39 | 1.28 | 2.05  | 3.55         | 3.43          | 3.25            | 3.18   | 6.13   |
| C2H2O2 (Ethanediol)                | 7.23 | 6.60 | 6.43 | 6.33 | 6.60  | 6.70         | 6.71          | 6.69            | 7.20   | 8.47   |
| C2H4 (Ethylene)                    | 4.90 | 1.68 | 1.74 | 1.51 | 2.39  | 3.70         | 3.58          | 3.55            | 3.45   | 5.85   |
| C2H4O (Ethylene oxide)             | 4.06 | 1.77 | 1.82 | 1.73 | 2.37  | 3.62         | 3.44          | 3.19            | 3.45   | 5.75   |
| C2H4S (Thiirane)                   | 3.79 | 1.96 | 1.93 | 1.36 | 2.40  | 3.48         | 3.35          | 3.08            | 3.26   | 5.09   |
| C2H5N (Aziridine)                  | 3.98 | 1.97 | 1.96 | 1.82 | 2.56  | 3.78         | 3.63          | 3.38            | 3.60   | 5.02   |
| C2H6 (Ethane)                      | 3.37 | 1.15 | 1.27 | 1.29 | 1.85  | 3.08         | 2.94          | 2.77            | 2.81   | 4.16   |
| C2HF3 (Trifluoroethylene)          | 4.19 | 2.06 | 2.04 | 3.15 | 2.68  | 4.09         | 3.87          | 3.50            | 4.95   | 6.77   |
| C2N2 (Cyanogen)                    | 5.48 | 5.81 | 5.51 | 5.26 | 5.01  | 4.70         | 4.71          | 4.80            | 5.20   | 5.50   |
| C3H4 (Cyclopropene)                | 4.88 | 1.80 | 1.59 | 2.86 | 2.14  | 4.07         | 3.85          | 3.37            | 3.37   | 5.98   |
| C3H6 (Cyclopropane)                | 3.09 | 1.68 | 1.73 | 1.68 | 2.32  | 3.55         | 3.43          | 3.25            | 2.75   | 4.65   |
| C3H8 (Propane)                     | 3.90 | 1.78 | 1.80 | 1.66 | 2.36  | 3.63         | 3.51          | 3.29            | 3.36   | 4.53   |
| C3O2 (Carbon suboxide)             | 4.10 | 4.33 | 4.43 | 4.31 | 4.35  | 4.22         | 4.07          | 3.78            | 3.87   | 4.44   |
| C4H2 (Diacetylene)                 | 3.42 | 2.37 | 2.48 | 2.47 | 2.81  | 2.68         | 2.58          | 3.10            | 3.37   | 4.09   |
| C4H4O (Furan)                      | 3.20 | 1.28 | 1.19 | 1.24 | 1.71  | 3.57         | 3.36          | 2.92            | 3.80   | 5.14   |
| C4H6 (Cyclobutene)                 | 5.09 | 1.67 | 1.71 | 1.82 | 2.23  | 3.37         | 3.28          | 3.12            | 3.63   | 5.93   |
| C4N2 (2-Butynedinitrile)           | 3.22 | 4.29 | 3.99 | 3.62 | 3.18  | 2.40         | 2.46          | 2.65            | 2.97   | 3.16   |
| CCl4 (Carbon tetrachloride)        | 5.03 | 4.71 | 3.52 | 4.03 | 3.63  | 4.82         | 4.63          | 4.31            | 4.69   | 6.23   |
| CF2Cl2 (Difluorodichloromethane)   | 5.89 | 3.94 | 3.64 | 3.60 | 4.23  | 6.03         | 5.73          | 5.21            | 5.40   | 7.26   |
| CF2O (Carbonic difluoride)         | 6.47 | 2.96 | 2.96 | 2.84 | 3.60  | 4.95         | 4.68          | 4.26            | 5.10   | 7.28   |
| CF3Br (Bromotrifluoromethane)      | 3.84 | 4.19 | 3.81 | 3.96 | 4.71  | 6.27         | 3.63          | 3.39            | 3.79   | 4.75   |
| CF3Cl (Methane, chlorotrifluoro-)  | 4.18 | 3.30 | 3.02 | 3.06 | 3.98  | 4.11         | 3.93          | 5.08            | 3.92   | 5.53   |
| CF4 (Carbon tetrafluoride)         | 4.30 | 1.32 | 1.57 | 2.06 | 2.19  | 3.77         | 3.51          | 3.25            | 3.56   | 5.71   |
| CFCl3 (Trichloromonofluoromethane) | 5.53 | 4.14 | 3.89 | 4.11 | 4.18  | 5.41         | 5.23          | 4.92            | 5.19   | 6.57   |
| CH2CCH2 (Allene)                   | 3.59 | 1.68 | 1.73 | 1.82 | 2.32  | 3.60         | 3.50          | 3.30            | 3.64   | 4.56   |
| CH2CCl2 (Ethene, 1,1-dichloro-)    | 4.15 | 3.31 | 1.94 | 3.39 | 2.52  | 4.19         | 3.99          | 3.56            | 3.52   | 4.80   |

|                                                         |       |       |       |       |       |       |       |       |       |      |
|---------------------------------------------------------|-------|-------|-------|-------|-------|-------|-------|-------|-------|------|
| CH <sub>2</sub> CF <sub>2</sub> (Ethene, 1,1-difluoro-) | 4.32  | 1.85  | 1.90  | 1.72  | 2.52  | 3.79  | 3.64  | 3.39  | 3.54  | 6.24 |
| CH <sub>2</sub> CHCHO (Acrolein)                        | 6.68  | 5.78  | 5.55  | 5.66  | 5.95  | 6.32  | 6.29  | 6.20  | 6.90  | 8.23 |
| CH <sub>2</sub> CHCl (Ethene, chloro-)                  | 4.00  | 3.46  | 1.86  | 3.04  | 2.42  | 3.92  | 3.71  | 3.29  | 4.33  | 5.32 |
| CH <sub>2</sub> CHF (Ethene, fluoro-)                   | 4.03  | 1.72  | 1.78  | 3.09  | 3.77  | 3.61  | 3.49  | 3.29  | 4.71  | 5.98 |
| CH <sub>2</sub> Cl <sub>2</sub> (Methylene chloride)    | 4.95  | 3.12  | 2.87  | 2.77  | 3.40  | 4.94  | 4.70  | 4.24  | 4.44  | 6.13 |
| CH <sub>2</sub> CO (Ketene)                             | 4.08  | 2.31  | 2.26  | 2.04  | 2.60  | 3.94  | 3.79  | 3.51  | 3.91  | 5.62 |
| CH <sub>2</sub> F <sub>2</sub> (Methane, difluoro-)     | 4.53  | 1.86  | 1.92  | 1.94  | 2.60  | 3.94  | 3.75  | 3.49  | 3.83  | 5.54 |
| CH <sub>3</sub> (Methyl radical)                        | 4.04  | 2.62  | 2.88  | 2.60  | 3.04  | 3.06  | 3.03  | 3.11  | 3.40  | 4.08 |
| CH <sub>3</sub> CCCH <sub>3</sub> (2-Butyne)            | 3.57  | 1.73  | 1.78  | 1.51  | 2.76  | 3.51  | 3.42  | 3.23  | 3.27  | 4.70 |
| CH <sub>3</sub> CCH (Propyne)                           | 3.52  | 1.82  | 1.82  | 1.86  | 2.27  | 4.11  | 3.83  | 3.29  | 3.13  | 4.76 |
| CH <sub>3</sub> CH <sub>2</sub> Cl (Ethyl chloride)     | 4.09  | 2.07  | 2.05  | 2.04  | 2.56  | 4.15  | 3.91  | 3.44  | 3.65  | 5.32 |
| CH <sub>3</sub> CH <sub>2</sub> OH (Ethanol)            | 4.45  | 2.03  | 2.03  | 1.87  | 2.73  | 4.24  | 4.06  | 3.70  | 3.94  | 5.72 |
| CH <sub>3</sub> Cl (Methyl chloride)                    | 4.46  | 2.29  | 2.24  | 1.92  | 2.85  | 4.37  | 4.13  | 3.67  | 3.94  | 6.56 |
| CH <sub>3</sub> COCl (Acetyl Chloride)                  | 4.78  | 4.27  | 3.85  | 3.73  | 3.02  | 4.56  | 4.53  | 4.27  | 4.67  | 5.31 |
| CH <sub>3</sub> F (Methyl fluoride)                     | 4.44  | 1.83  | 1.90  | 1.74  | 2.56  | 4.01  | 3.79  | 3.48  | 3.74  | 5.62 |
| CH <sub>3</sub> NHCH <sub>3</sub> (Dimethylamine)       | 3.87  | 1.89  | 1.88  | 1.68  | 2.46  | 3.78  | 3.65  | 3.39  | 3.48  | 4.68 |
| CH <sub>3</sub> NO <sub>2</sub> (Methane, nitro-)       | 6.94  | 5.11  | 4.67  | 4.61  | 3.23  | 5.11  | 4.82  | 4.17  | 5.05  | 5.09 |
| CH <sub>3</sub> OCH <sub>3</sub> (Dimethyl ether)       | 3.81  | 1.85  | 1.85  | 1.68  | 2.40  | 3.67  | 3.54  | 3.29  | 3.36  | 4.73 |
| CH <sub>3</sub> OH (Methyl alcohol)                     | 4.67  | 2.10  | 2.10  | 1.84  | 2.84  | 4.36  | 4.17  | 3.80  | 4.07  | 6.03 |
| CH <sub>3</sub> SH (Methanethiol)                       | 4.33  | 2.29  | 2.23  | 2.01  | 2.84  | 4.39  | 4.17  | 3.74  | 3.82  | 5.44 |
| CH <sub>3</sub> SiH <sub>3</sub> (Methyl silane)        | 3.78  | 2.01  | 1.81  | 1.59  | 2.39  | 3.75  | 3.64  | 3.38  | 3.41  | 4.80 |
| CH <sub>4</sub> (Methane)                               | 4.34  | 1.73  | 1.81  | 1.83  | 2.53  | 4.02  | 3.85  | 3.58  | 3.64  | 5.32 |
| CHCl <sub>3</sub> (Chloroform)                          | 4.99  | 3.46  | 3.22  | 3.17  | 3.59  | 4.98  | 4.71  | 4.24  | 4.57  | 6.28 |
| CHF <sub>3</sub> (Methane, trifluoro-)                  | 4.44  | 1.83  | 1.90  | 1.92  | 2.59  | 3.91  | 3.70  | 3.45  | 3.72  | 5.50 |
| CHONH <sub>2</sub> (Formamide)                          | 4.93  | 2.36  | 2.14  | 3.17  | 3.09  | 5.03  | 4.78  | 4.21  | 6.19  | 8.56 |
| Cl (Chlorine atom)                                      | -0.11 | -0.19 | -0.12 | -1.25 | -0.20 | -0.81 | -0.72 | -0.59 | -0.20 | 1.01 |
| Cl <sub>2</sub> (Chlorine diatomic)                     | 7.05  | 6.00  | 5.82  | 6.01  | 6.24  | 6.79  | 6.74  | 6.63  | 6.91  | 7.66 |
| ClF (Chlorine monofluoride)                             | 8.09  | 2.85  | 2.72  | 6.68  | 2.95  | 7.78  | 3.23  | 3.18  | 7.95  | 9.16 |
| ClF <sub>3</sub> (Chlorine trifluoride)                 | 7.48  | 7.10  | 6.86  | 6.90  | 7.03  | 7.15  | 7.15  | 7.14  | 7.41  | 8.18 |
| ClO (Monochlorine monoxide)                             | 4.07  | 3.62  | 3.63  | 3.15  | 3.65  | 3.72  | 3.64  | 3.56  | 3.84  | 4.51 |
| CO (Carbon monoxide)                                    | 6.87  | 3.88  | 3.54  | 3.43  | 4.63  | 6.60  | 6.32  | 5.71  | 6.26  | 8.67 |
| CO <sub>2</sub> (Carbon dioxide)                        | 3.34  | 1.05  | 1.27  | 1.67  | 1.88  | 3.22  | 2.97  | 2.79  | 2.87  | 4.42 |
| CS (Carbon monosulfide)                                 | 6.47  | 5.71  | 5.51  | 5.68  | 6.04  | 7.93  | 7.63  | 6.38  | 6.98  | 8.21 |
| CS <sub>2</sub> (Carbon disulfide)                      | 3.35  | 2.87  | 2.77  | 2.40  | 2.89  | 7.69  | 5.94  | 5.83  | 2.27  | 2.33 |
| F (Fluorine atom)                                       | 0.40  | -0.52 | -0.15 | -1.12 | -0.28 | -0.60 | -0.76 | -0.80 | -0.42 | 0.51 |
| F <sub>2</sub> (Fluorine diatomic)                      | 10.99 | 9.04  | 8.71  | 8.52  | 9.65  | 9.98  | 10.00 | 9.93  | 10.77 | 2.81 |
| F <sub>2</sub> O (Difluorine monoxide)                  | 6.50  | 4.51  | 4.21  | 4.41  | 5.18  | 5.67  | 5.65  | 5.53  | 6.35  | 8.43 |
| FCN (Cyanogen fluoride)                                 | 5.83  | 3.53  | 3.47  | 3.09  | 4.19  | 5.61  | 5.32  | 4.83  | 5.18  | 7.14 |

|                              |      |       |       |       |       |      |      |       |      |       |
|------------------------------|------|-------|-------|-------|-------|------|------|-------|------|-------|
| H (Hydrogen atom)            | 2.01 | -0.35 | -0.33 | -1.19 | -0.08 | 0.59 | 0.43 | 0.21  | 0.28 | 0.31  |
| H2CO (Formaldehyde)          | 4.16 | 3.06  | 3.09  | 2.93  | 2.57  | 4.13 | 3.56 | 3.98  | 4.22 | 5.22  |
| H2CS (Thioformaldehyde)      | 3.05 | 2.87  | 3.02  | 2.98  | 2.95  | 2.53 | 2.43 | 2.67  | 3.03 | 3.46  |
| H2O (Water)                  | 5.54 | 2.56  | 2.58  | 2.33  | 3.47  | 5.06 | 4.81 | 4.35  | 4.79 | 7.26  |
| H2O2 (Hydrogen peroxide)     | 6.95 | 3.22  | 2.94  | 2.66  | 4.26  | 6.27 | 6.00 | 5.37  | 6.36 | 10.15 |
| H2S (Hydrogen sulfide)       | 4.50 | 2.28  | 2.26  | 2.01  | 2.93  | 4.29 | 4.14 | 3.80  | 3.82 | 5.50  |
| HCCCN (Cyanoacetylene)       | 3.58 | 3.71  | 3.18  | 2.81  | 3.22  | 3.39 | 3.25 | 3.50  | 3.78 | 4.46  |
| HCCF (Fluoroacetylene)       | 4.36 | 2.03  | 2.01  | 3.17  | 2.72  | 4.25 | 4.06 | 3.69  | 5.09 | 6.96  |
| HCl (Hydrogen sulfide)       | 5.26 | 2.66  | 2.61  | 2.36  | 3.40  | 4.96 | 4.72 | 4.25  | 4.60 | 6.61  |
| HCN (Hydrogen cyanide)       | 4.86 | 2.28  | 1.93  | 2.90  | 2.56  | 4.29 | 4.02 | 3.49  | 5.03 | 7.16  |
| HCO (Formyl radical)         | 7.51 | 5.76  | 5.53  | 5.27  | 6.18  | 6.79 | 6.69 | 6.47  | 7.07 | 8.56  |
| HCOOH (Formic acid)          | 6.15 | 3.14  | 2.74  | 3.70  | 3.93  | 6.07 | 5.83 | 5.25  | 6.95 | 9.76  |
| He (Helium atom)             | 3.16 | -1.93 | -2.18 | -2.76 | -0.84 | 1.30 | 0.83 | -0.13 | 1.03 | 3.65  |
| HF (Hydrogen fluoride)       | 6.27 | 2.80  | 2.86  | 2.66  | 3.86  | 5.41 | 5.10 | 4.61  | 5.41 | 8.28  |
| Li (Lithium atom)            | 2.89 | 2.10  | 2.09  | 2.12  | 2.24  | 2.68 | 2.72 | 2.68  | 2.33 | 2.50  |
| Mg (Magnesium atom)          | 3.48 | 1.55  | 1.45  | 1.40  | 1.87  | 3.40 | 3.34 | 3.04  | 2.54 | 3.54  |
| N (Nitrogen atom)            | 4.29 | 2.38  | 2.63  | 1.69  | 2.68  | 3.05 | 2.91 | 2.85  | 3.11 | 4.35  |
| N2 (Nitrogen diatomic)       | 4.78 | 2.92  | 3.00  | 2.82  | 2.30  | 4.04 | 3.80 | 3.50  | 3.52 | 5.92  |
| N2H4 (Hydrazine)             | 4.68 | 2.51  | 2.51  | 2.30  | 3.12  | 4.28 | 4.13 | 3.82  | 4.10 | 5.65  |
| N2O (Nitrous oxide)          | 6.14 | 2.84  | 2.83  | 2.98  | 2.24  | 3.83 | 3.57 | 3.15  | 4.33 | 6.62  |
| Na (Sodium atom)             | 2.12 | 1.70  | 1.74  | 2.14  | 1.80  | 2.30 | 2.35 | 2.31  | 1.75 | 1.79  |
| NaCl (Sodium Chloride)       | 3.51 | 2.93  | 3.04  | 2.74  | 3.37  | 3.41 | 3.27 | 3.23  | 3.88 | 4.95  |
| Ne (Neon atom)               | 8.66 | 5.12  | 5.18  | 4.39  | 6.30  | 7.40 | 6.90 | 6.20  | 7.35 | 9.82  |
| NF3 (Nitrogen trifluoride)   | 6.55 | 4.03  | 3.67  | 3.46  | 4.57  | 6.44 | 6.13 | 5.55  | 5.83 | 8.73  |
| NH (Imidogen)                | 9.56 | 7.06  | 6.73  | 6.74  | 7.43  | 8.00 | 7.91 | 7.72  | 8.74 | 10.42 |
| NH2 (Amino radical)          | 9.30 | 7.61  | 7.33  | 7.04  | 7.87  | 8.33 | 8.22 | 8.04  | 8.88 | 10.27 |
| NH3 (Ammonia)                | 4.77 | 2.24  | 2.26  | 2.14  | 3.02  | 4.49 | 4.31 | 3.94  | 4.09 | 5.97  |
| NO (Nitric oxide)            | 3.97 | 3.25  | 3.37  | 3.37  | 3.40  | 3.25 | 3.21 | 3.33  | 3.54 | 4.16  |
| NO2 (Nitrogen dioxide)       | 7.14 | 5.79  | 5.69  | 5.90  | 6.35  | 6.60 | 6.59 | 6.54  | 7.14 | 8.39  |
| O (Oxygen atom)              | 2.23 | 0.92  | 1.10  | 0.48  | 1.23  | 0.90 | 0.86 | 0.93  | 1.70 | 3.02  |
| O2 (Oxygen diatomic)         | 3.91 | 2.94  | 3.34  | 3.72  | 3.17  | 3.33 | 3.35 | 3.32  | 3.78 | 4.61  |
| O3 (Ozone)                   | 5.71 | 5.03  | 4.95  | 5.03  | 5.25  | 5.43 | 5.39 | 5.33  | 5.37 | 4.95  |
| OCS (Carbonyl sulfide)       | 4.53 | 3.70  | 3.57  | 3.15  | 3.15  | 4.36 | 4.21 | 3.90  | 4.76 | 5.36  |
| OH (Hydroxyl radical)        | 7.24 | 5.61  | 5.22  | 4.66  | 5.74  | 5.93 | 5.88 | 5.79  | 6.76 | 8.80  |
| P (Phosphorus atom)          | 2.74 | 1.81  | 2.00  | 1.25  | 1.92  | 2.04 | 1.96 | 1.99  | 1.96 | 2.59  |
| P2 (Phosphorus diatomic)     | 3.32 | 3.20  | 3.09  | 3.26  | 3.18  | 3.40 | 3.37 | 3.33  | 3.40 | 3.40  |
| PF3 (Phosphorus trifluoride) | 4.87 | 2.41  | 2.25  | 2.22  | 2.96  | 4.84 | 4.56 | 4.04  | 4.16 | 5.98  |
| PH3 (Phosphine)              | 4.09 | 2.06  | 2.04  | 1.94  | 2.64  | 3.92 | 3.81 | 3.55  | 3.52 | 4.98  |

|                              |      |       |       |       |       |       |       |       |       |      |
|------------------------------|------|-------|-------|-------|-------|-------|-------|-------|-------|------|
| S (Sulfur atom)              | 1.26 | 0.68  | 0.81  | 0.13  | 0.90  | 0.39  | 0.48  | 0.62  | 1.41  | 2.90 |
| S2 (Sulfur diatomic)         | 3.32 | 2.90  | 2.93  | 3.00  | 2.91  | 3.51  | 3.31  | 3.12  | 3.13  | 3.36 |
| Si (Silicon atom)            | 1.76 | 1.38  | 1.44  | 0.91  | 1.48  | 1.35  | 1.39  | 1.50  | 1.48  | 1.98 |
| Si2H6 (Disilane)             | 3.60 | 1.54  | 1.45  | 1.65  | 1.93  | 3.83  | 3.65  | 3.20  | 3.04  | 4.72 |
| SiF2 (Silicon difluoride)    | 5.37 | 3.95  | 3.74  | 3.72  | 4.21  | 5.11  | 5.02  | 4.80  | 4.92  | 5.88 |
| SiF4 (Silicon tetrafluoride) | 4.45 | 2.08  | 2.03  | 2.11  | 2.56  | 4.07  | 3.83  | 3.39  | 3.59  | 5.70 |
| SiH3 (Silyl)                 | 2.59 | 2.08  | 2.04  | 1.95  | 2.09  | 2.59  | 2.48  | 2.23  | 2.39  | 4.32 |
| SiH4 (Silane)                | 3.96 | 1.75  | 1.77  | 1.86  | 2.36  | 3.80  | 3.66  | 3.42  | 3.40  | 5.12 |
| SiO (Silicon monoxide)       | 5.88 | 4.36  | 4.18  | 4.07  | 4.74  | 5.66  | 5.58  | 5.36  | 5.59  | 6.80 |
| SO2 (Sulfur dioxide)         | 7.27 | 6.70  | 6.49  | 6.62  | 6.84  | 6.97  | 7.00  | 7.00  | 7.43  | 8.23 |
| MAE                          |      | 1.77  | 1.85  | 1.86  | 1.42  | 0.53  | 0.66  | 0.87  | 0.57  | 1.17 |
| MSE                          |      | -1.74 | -1.83 | -1.82 | -1.39 | -0.34 | -0.56 | -0.79 | -0.43 | 0.93 |
| RMS                          |      | 2.05  | 2.13  | 2.12  | 1.66  | 0.81  | 0.92  | 1.11  | 0.71  | 1.49 |

Table S12. Exciton binding energies (3) [in eV] of the 121 molecules studied. The reference values are the differences between the CCSD fundamental gaps and the EOM-CCSD optical gaps.

| Molecule                           | Ref. | LDA   | PBE   | M06L  | B3LYP | $\omega$ B97 | $\omega$ B97X | $\omega$ B97X-D | M06-2X | M06-HF |
|------------------------------------|------|-------|-------|-------|-------|--------------|---------------|-----------------|--------|--------|
| Al (Aluminum atom)                 | 2.39 | -2.68 | -2.40 | -2.39 | -1.25 | 2.64         | 2.45          | 2.10            | 0.37   | -0.43  |
| AlCl3 (Aluminum trichloride)       | 4.11 | -0.75 | -0.72 | -0.64 | 0.39  | 4.45         | 4.29          | 3.79            | 2.31   | 4.77   |
| Ar (Argon atom)                    | 6.14 | -0.05 | -0.10 | -0.02 | 1.22  | 5.98         | 5.91          | 5.16            | 3.44   | 6.16   |
| B (Boron atom)                     | 3.01 | -3.91 | -2.95 | -1.36 | -1.32 | 3.90         | 3.78          | 2.92            | 1.06   | 0.00   |
| BCl3 (Borane, trichloro-)          | 4.74 | -1.52 | -1.47 | -1.46 | -0.01 | 4.99         | 4.62          | 3.86            | 2.41   | 5.41   |
| Be (Beryllium atom)                | 4.34 | -1.36 | -1.31 | -1.10 | 0.01  | 4.30         | 4.19          | 3.65            | 1.98   | 4.01   |
| BF3 (Borane, trifluoro-)           | 4.58 | -1.26 | -1.20 | -0.75 | 0.00  | 4.11         | 3.99          | 3.45            | 2.00   | 5.00   |
| C (Carbon atom)                    | 2.38 | -5.85 | -4.76 | -3.34 | -2.77 | 3.25         | 3.04          | 1.95            | 0.24   | 1.67   |
| C2F4 (Tetrafluoroethylene)         | 4.84 | -0.24 | -0.06 | 0.01  | 1.03  | 4.81         | 4.74          | 4.25            | 2.67   | 4.91   |
| C2H2 (Acetylene)                   | 4.92 | -0.70 | -0.27 | -0.01 | 0.83  | 3.74         | 3.70          | 3.49            | 2.11   | 3.94   |
| C2H2O2 (Ethanediol)                | 7.23 | -0.24 | -0.21 | -0.08 | 1.65  | 7.08         | 6.67          | 5.78            | 4.81   | 9.36   |
| C2H4 (Ethylene)                    | 4.90 | -1.23 | -0.83 | -0.73 | 0.66  | 3.90         | 3.88          | 3.59            | 2.19   | 3.98   |
| C2H4O (Ethylene oxide)             | 4.06 | 0.01  | 0.01  | -0.01 | 0.82  | 3.83         | 3.76          | 3.43            | 2.13   | 4.54   |
| C2H4S (Thiirane)                   | 3.79 | -0.74 | -0.46 | -0.85 | 0.72  | 3.71         | 3.70          | 3.35            | 1.96   | 3.94   |
| C2H5N (Aziridine)                  | 3.98 | -0.02 | -0.02 | -0.01 | 0.93  | 4.00         | 3.97          | 3.63            | 2.35   | 4.33   |
| C2H6 (Ethane)                      | 3.37 | -0.66 | -0.59 | -0.52 | 0.27  | 3.29         | 3.24          | 2.98            | 1.60   | 3.49   |
| C2HF3 (Trifluoroethylene)          | 4.19 | -0.59 | -0.21 | -0.09 | 0.98  | 4.30         | 4.20          | 3.75            | 2.49   | 4.77   |
| C2N2 (Cyanogen)                    | 5.48 | -1.02 | -1.14 | -1.14 | -0.01 | 4.88         | 4.47          | 3.72            | 2.58   | 6.06   |
| C3H4 (Cyclopropene)                | 4.88 | -1.04 | -0.89 | -0.66 | 0.56  | 4.27         | 4.17          | 3.62            | 2.21   | 4.23   |
| C3H6 (Cyclopropane)                | 3.09 | -0.03 | -0.02 | -0.02 | 0.85  | 3.74         | 3.72          | 3.46            | 1.58   | 4.01   |
| C3H8 (Propane)                     | 3.90 | -0.01 | -0.01 | -0.03 | 0.85  | 3.83         | 3.81          | 3.50            | 2.18   | 3.96   |
| C3O2 (Carbon suboxide)             | 4.10 | -2.40 | -1.99 | -2.04 | -0.57 | 3.97         | 3.63          | 3.01            | 1.76   | 4.59   |
| C4H2 (Diacetylene)                 | 3.42 | -2.31 | -1.81 | -1.57 | -0.51 | 2.82         | 2.80          | 2.72            | 1.48   | 3.05   |
| C4H4O (Furan)                      | 3.20 | -1.21 | -0.95 | -0.79 | 0.34  | 3.77         | 3.68          | 3.16            | 1.60   | 3.20   |
| C4H6 (Cyclobutene)                 | 5.09 | -0.65 | -0.28 | -0.17 | 0.80  | 3.57         | 3.59          | 3.35            | 2.00   | 3.67   |
| C4N2 (2-Butynedinitrile)           | 3.22 | -1.57 | -1.72 | -1.86 | -1.14 | 2.84         | 2.54          | 2.00            | 0.73   | 3.75   |
| CCl4 (Carbon tetrachloride)        | 5.03 | -0.13 | -1.09 | -1.03 | 0.17  | 5.43         | 5.00          | 4.12            | 2.94   | 5.96   |
| CF2Cl2 (Difluorodichloromethane)   | 5.89 | -0.33 | -0.30 | -0.30 | 1.25  | 6.26         | 5.99          | 5.18            | 3.83   | 6.43   |
| CF2O (Carbonic difluoride)         | 6.47 | -1.52 | -1.09 | -1.01 | 0.62  | 5.18         | 5.05          | 4.46            | 2.94   | 5.53   |
| CF3Br (Bromotrifluoromethane)      | 3.84 | -0.41 | -0.38 | -0.11 | 1.32  | 6.58         | 3.90          | 3.30            | 1.85   | 4.33   |
| CF3Cl (Methane, chlorotrifluoro-)  | 4.18 | -0.44 | -0.40 | -0.38 | 1.44  | 4.45         | 4.37          | 5.32            | 2.38   | 4.65   |
| CF4 (Carbon tetrafluoride)         | 4.30 | -1.13 | -1.01 | -0.67 | 0.01  | 4.04         | 3.92          | 3.49            | 1.91   | 4.67   |
| CFCl3 (Trichloromonofluoromethane) | 5.53 | -0.58 | -0.56 | -0.55 | 0.81  | 5.89         | 5.49          | 4.67            | 3.37   | 6.18   |
| CH2CCH2 (Allene)                   | 3.59 | -0.80 | -0.45 | -0.37 | 0.84  | 3.81         | 3.81          | 3.51            | 2.13   | 3.92   |
| CH2CCl2 (Ethene, 1,1-dichloro-)    | 4.15 | -1.26 | -1.18 | -0.73 | 0.23  | 4.45         | 4.36          | 3.85            | 2.29   | 4.06   |

|                                |       |       |       |        |       |       |       |       |       |       |
|--------------------------------|-------|-------|-------|--------|-------|-------|-------|-------|-------|-------|
| CH2CF2 (Ethene, 1,1-difluoro-) | 4.32  | -0.72 | -0.29 | -0.13  | 0.90  | 4.00  | 3.96  | 3.63  | 2.29  | 4.21  |
| CH2CHCHO (Acrolein)            | 6.68  | -0.21 | -0.18 | -0.06  | 1.59  | 6.87  | 6.48  | 5.62  | 4.69  | 8.23  |
| CH2CHCl (Ethene, chloro-)      | 4.00  | -1.14 | -1.03 | -0.98  | 0.38  | 4.17  | 4.07  | 3.56  | 2.13  | 3.92  |
| CH2CHF (Ethene, fluoro-)       | 4.03  | -1.13 | -0.70 | -0.59  | 0.75  | 3.83  | 3.82  | 3.54  | 2.19  | 4.04  |
| CH2Cl2 (Methylene chloride)    | 4.95  | -0.19 | -0.16 | -0.14  | 1.21  | 5.20  | 5.07  | 4.51  | 3.10  | 5.30  |
| CH2CO (Ketene)                 | 4.08  | -1.99 | -1.59 | -1.49  | 0.05  | 4.14  | 4.11  | 3.74  | 2.38  | 4.39  |
| CH2F2 (Methane, difluoro-)     | 4.53  | 0.00  | 0.00  | -0.03  | 0.96  | 4.14  | 4.06  | 3.73  | 2.49  | 4.67  |
| CH3 (Methyl radical)           | 4.04  | -3.34 | -2.43 | -1.95  | -0.92 | 4.10  | 3.73  | 3.13  | 1.27  | 1.61  |
| CH3CCCH3 (2-Butyne)            | 3.57  | 0.01  | 0.00  | -0.01  | 0.81  | 3.70  | 3.70  | 3.42  | 2.07  | 3.84  |
| CH3CCH (Propyne)               | 3.52  | 0.01  | 0.00  | -0.01  | 0.81  | 4.34  | 4.17  | 3.54  | 2.08  | 3.88  |
| CH3CH2Cl (Ethyl chloride)      | 4.09  | -0.15 | -0.06 | -0.04  | 0.86  | 4.39  | 4.26  | 3.70  | 2.40  | 4.64  |
| CH3CH2OH (Ethanol)             | 4.45  | -0.03 | -0.02 | 0.00   | 1.05  | 4.46  | 4.39  | 3.95  | 2.69  | 5.07  |
| CH3Cl (Methyl chloride)        | 4.46  | -0.22 | -0.14 | -0.11  | 0.98  | 4.60  | 4.47  | 3.92  | 2.63  | 4.90  |
| CH3COCl (Acetyl Chloride)      | 4.78  | -0.21 | -0.18 | -0.06  | 0.31  | 4.80  | 4.88  | 4.50  | 3.04  | 4.86  |
| CH3F (Methyl fluoride)         | 4.44  | 0.00  | -0.01 | -0.02  | 0.92  | 4.22  | 4.10  | 3.71  | 2.44  | 4.78  |
| CH3NHCH3 (Dimethylamine)       | 3.87  | -0.01 | -0.01 | -0.03  | 0.90  | 3.97  | 3.96  | 3.61  | 2.30  | 4.29  |
| CH3NO2 (Methane, nitro-)       | 6.94  | -0.25 | -0.21 | -0.11  | -0.73 | 5.13  | 4.65  | 3.60  | 2.96  | 6.02  |
| CH3OCH3 (Dimethyl ether)       | 3.81  | 0.01  | 0.00  | -0.03  | 0.85  | 3.87  | 3.85  | 3.51  | 2.17  | 4.08  |
| CH3OH (Methyl alcohol)         | 4.67  | -0.03 | -0.03 | 0.00   | 1.09  | 4.57  | 4.48  | 4.02  | 2.78  | 5.23  |
| CH3SH (Methanethiol)           | 4.33  | -0.07 | -0.05 | -0.03  | 1.01  | 4.62  | 4.50  | 3.98  | 2.58  | 4.67  |
| CH3SiH3 (Methyl silane)        | 3.78  | -0.07 | -0.12 | -0.06  | 0.84  | 3.93  | 3.91  | 3.58  | 2.26  | 4.12  |
| CH4 (Methane)                  | 4.34  | -0.05 | -0.06 | -0.07  | 0.91  | 4.24  | 4.17  | 3.81  | 2.43  | 4.53  |
| CHCl3 (Chloroform)             | 4.99  | -0.68 | -0.67 | -0.65  | 0.68  | 5.28  | 5.11  | 4.46  | 3.08  | 5.45  |
| CHF3 (Methane, trifluoro-)     | 4.44  | -0.10 | -0.09 | -0.08  | 0.88  | 4.12  | 4.03  | 3.69  | 2.43  | 4.65  |
| CHONH2 (Formamide)             | 4.93  | -0.23 | -0.09 | -0.09  | 1.23  | 5.28  | 5.15  | 4.48  | 3.55  | 6.31  |
| Cl (Chlorine atom)             | -0.11 | -8.27 | -8.10 | -8.72  | -6.17 | -0.74 | -1.27 | -2.22 | -3.06 | 1.98  |
| Cl2 (Chlorine diatomic)        | 7.05  | -0.42 | -0.38 | -0.33  | 1.46  | 7.01  | 6.54  | 5.61  | 4.48  | 8.34  |
| ClF (Chlorine monofluoride)    | 8.09  | -4.46 | -4.34 | -0.34  | -2.43 | 7.68  | 2.73  | 1.80  | 5.20  | 9.66  |
| ClF3 (Chlorine trifluoride)    | 7.48  | -0.42 | -0.38 | -0.33  | 1.53  | 7.25  | 6.78  | 5.80  | 4.85  | 9.61  |
| ClO (Monochlorine monoxide)    | 4.07  | -4.22 | -4.14 | -4.25  | -1.93 | 3.93  | 3.39  | 2.27  | 1.36  | 6.30  |
| CO (Carbon monoxide)           | 6.87  | -1.31 | -1.21 | -0.94  | 1.00  | 6.73  | 6.35  | 5.36  | 4.29  | 7.60  |
| CO2 (Carbon dioxide)           | 3.34  | -2.03 | -1.78 | -1.24  | -0.65 | 3.41  | 3.28  | 2.95  | 1.23  | 3.46  |
| CS (Carbon monosulfide)        | 6.47  | -0.76 | -0.71 | -0.54  | 1.30  | 7.00  | 6.51  | 5.54  | 4.47  | 8.83  |
| CS2 (Carbon disulfide)         | 3.35  | -2.60 | -2.47 | -3.06  | -1.13 | 6.61  | 6.19  | 5.39  | 0.15  | 2.97  |
|                                |       | -     | -     |        |       |       |       |       |       |       |
| F (Fluorine atom)              | 0.40  | 12.20 | 10.98 | -10.32 | -7.86 | -1.57 | -2.15 | -3.40 | -3.10 | 3.48  |
| F2 (Fluorine diatomic)         | 10.99 | -0.70 | -0.60 | -0.18  | 2.65  | 8.83  | 8.48  | 7.37  | 7.88  | 5.15  |
| F2O (Difluorine monoxide)      | 6.50  | -3.74 | -3.62 | -3.30  | -0.76 | 5.35  | 4.92  | 3.82  | 3.74  | 10.11 |



|                              |      |       |       |        |       |      |      |       |        |        |
|------------------------------|------|-------|-------|--------|-------|------|------|-------|--------|--------|
| FCN (Cyanogen fluoride)      | 5.83 | -0.26 | -0.21 | -0.06  | 1.27  | 5.85 | 5.65 | 4.95  | 3.42   | 6.25   |
| H (Hydrogen atom)            | 2.01 | -4.13 | -2.73 | -97.60 | -1.12 | 0.39 | 0.26 | -0.24 | -15.16 | -50.86 |
| H2CO (Formaldehyde)          | 4.16 | -2.70 | -2.24 | -2.05  | -0.57 | 3.93 | 3.89 | 3.32  | 1.99   | 4.31   |
| H2CS (Thioformaldehyde)      | 3.05 | -3.49 | -3.12 | -3.19  | -1.69 | 2.99 | 2.50 | 1.92  | 0.57   | 3.87   |
| H2O (Water)                  | 5.54 | -0.09 | -0.09 | 0.00   | 1.22  | 5.25 | 5.14 | 4.55  | 3.25   | 6.12   |
| H2O2 (Hydrogen peroxide)     | 6.95 | -0.55 | -0.45 | -0.16  | 1.95  | 6.45 | 6.32 | 5.58  | 4.76   | 8.71   |
| H2S (Hydrogen sulfide)       | 4.50 | -0.09 | -0.09 | -0.07  | 0.99  | 4.49 | 4.45 | 4.02  | 2.54   | 4.57   |
| HCCCN (Cyanoacetylene)       | 3.58 | -1.71 | -1.83 | -1.92  | -0.75 | 3.63 | 3.41 | 2.85  | 1.54   | 3.92   |
| HCCF (Fluoroacetylene)       | 4.36 | -0.16 | -0.12 | -0.04  | 1.02  | 4.45 | 4.37 | 3.92  | 2.59   | 4.84   |
| HCl (Hydrogen chloride)      | 5.26 | -0.19 | -0.16 | -0.12  | 1.18  | 5.15 | 5.02 | 4.45  | 3.10   | 5.54   |
| HCN (Hydrogen cyanide)       | 4.86 | -0.77 | -0.79 | -0.50  | 0.76  | 4.51 | 4.35 | 3.75  | 2.70   | 5.07   |
| HCO (Formyl radical)         | 7.51 | -0.77 | -0.53 | -0.52  | 1.48  | 7.27 | 6.78 | 5.78  | 4.61   | 7.82   |
| HCOOH (Formic acid)          | 6.15 | -0.26 | -0.22 | -0.07  | 1.93  | 6.28 | 6.16 | 5.49  | 4.62   | 8.00   |
| He (Helium atom)             | 3.16 | -4.62 | -5.03 | -5.86  | -3.40 | 1.61 | 1.35 | 0.15  | -1.20  | 1.89   |
| HF (Hydrogen fluoride)       | 6.27 | -0.10 | -0.10 | 0.04   | 1.37  | 5.60 | 5.45 | 4.80  | 3.67   | 7.04   |
| Li (Lithium atom)            | 2.89 | -0.57 | -0.11 | 0.14   | 0.15  | 3.64 | 3.70 | 3.58  | 1.96   | -21.00 |
| Mg (Magnesium atom)          | 3.48 | -0.87 | -0.81 | -0.50  | 0.15  | 3.48 | 3.47 | 3.13  | 1.49   | 2.80   |
| N (Nitrogen atom)            | 4.29 | -5.20 | -4.59 | -4.57  | -2.78 | 3.40 | 2.91 | 1.93  | -0.01  | 1.33   |
| N2 (Nitrogen diatomic)       | 4.78 | -3.51 | -2.95 | -2.67  | -1.17 | 4.23 | 3.79 | 3.07  | 1.84   | 5.17   |
| N2H4 (Hydrazine)             | 4.68 | -0.01 | -0.01 | -0.03  | 1.05  | 4.52 | 4.48 | 4.05  | 2.63   | 4.83   |
| N2O (Nitrous oxide)          | 6.14 | -1.50 | -1.13 | -2.11  | -0.80 | 4.06 | 3.92 | 3.23  | 1.74   | 5.91   |
| Na (Sodium atom)             | 2.12 | -1.16 | -0.09 | 0.49   | -0.46 | 3.23 | 3.28 | 3.18  | 1.45   | -16.01 |
| NaCl (Sodium Chloride)       | 3.51 | -0.02 | -0.02 | -0.04  | 0.83  | 3.63 | 3.63 | 3.43  | 2.09   | 4.03   |
| Ne (Neon atom)               | 8.66 | -0.10 | -0.18 | 0.29   | 1.67  | 7.75 | 7.30 | 6.22  | 4.87   | 8.78   |
| NF3 (Nitrogen trifluoride)   | 6.55 | -0.37 | -0.33 | -0.17  | 1.80  | 6.73 | 6.56 | 5.76  | 4.19   | 7.69   |
| NH (Imidogen)                | 9.56 | -0.60 | -0.38 | 0.40   | 2.18  | 8.59 | 8.07 | 6.96  | 6.17   | 9.92   |
| NH2 (Amino radical)          | 9.30 | -0.02 | 0.32  | 1.01   | 2.84  | 9.15 | 8.56 | 7.43  | 6.67   | 10.96  |
| NH3 (Ammonia)                | 4.77 | -0.05 | -0.07 | -0.04  | 1.05  | 4.70 | 4.63 | 4.16  | 2.72   | 4.99   |
| NO (Nitric oxide)            | 3.97 | -4.75 | -4.57 | -4.28  | -2.63 | 3.00 | 2.45 | 1.55  | 0.55   | 5.49   |
| NO2 (Nitrogen dioxide)       | 7.14 | -1.75 | -1.53 | -1.27  | 0.87  | 6.75 | 6.29 | 5.27  | 4.50   | 9.72   |
| O (Oxygen atom)              | 2.23 | -8.72 | -7.86 | -7.12  | -5.22 | 0.86 | 0.37 | -0.68 | -1.07  | 4.20   |
| O2 (Oxygen diatomic)         | 3.91 | -6.10 | -5.33 | -4.73  | -3.24 | 2.97 | 2.46 | 1.31  | 0.84   | 6.65   |
| O3 (Ozone)                   | 5.71 | -3.55 | -3.42 | -3.17  | -0.94 | 5.15 | 4.62 | 3.50  | 2.70   | 6.85   |
| OCS (Carbonyl sulfide)       | 4.53 | -1.67 | -1.37 | -1.58  | 0.12  | 4.69 | 4.53 | 3.85  | 2.56   | 4.83   |
| OH (Hydroxyl radical)        | 7.24 | -3.69 | -3.36 | -2.66  | -0.24 | 6.29 | 5.75 | 4.54  | 4.58   | 11.03  |
| P (Phosphorus atom)          | 2.74 | -4.08 | -3.51 | -4.14  | -2.44 | 2.41 | 1.99 | 1.41  | -0.87  | -0.39  |
| P2 (Phosphorus diatomic)     | 3.32 | -2.45 | -2.38 | -2.25  | -1.04 | 3.84 | 3.47 | 2.74  | 1.08   | 3.75   |
| PF3 (Phosphorus trifluoride) | 4.87 | -0.96 | -0.78 | -0.55  | 0.63  | 5.02 | 4.86 | 4.20  | 2.64   | 5.02   |

|                              |      |       |       |       |       |       |       |       |       |       |
|------------------------------|------|-------|-------|-------|-------|-------|-------|-------|-------|-------|
| PH3 (Phosphine)              | 4.09 | -0.05 | -0.05 | -0.03 | 0.88  | 4.12  | 4.11  | 3.76  | 2.26  | 4.09  |
| S (Sulfur atom)              | 1.26 | -6.51 | -5.94 | -6.35 | -4.25 | 0.70  | 0.29  | -0.43 | -1.27 | 3.05  |
| S2 (Sulfur diatomic)         | 3.32 | -3.46 | -3.20 | -3.08 | -1.74 | 3.95  | 3.33  | 2.33  | 0.66  | 4.04  |
| Si (Silicon atom)            | 1.76 | -4.12 | -4.05 | -4.41 | -2.66 | 2.00  | 1.66  | 1.08  | -0.73 | -0.67 |
| Si2H6 (Disilane)             | 3.60 | -0.44 | -0.40 | -0.30 | 0.45  | 4.02  | 3.93  | 3.40  | 1.84  | 3.57  |
| SiF2 (Silicon difluoride)    | 5.37 | -1.26 | -1.20 | -1.07 | 0.26  | 5.44  | 5.07  | 4.28  | 2.64  | 5.51  |
| SiF4 (Silicon tetrafluoride) | 4.45 | -1.19 | -1.14 | -0.96 | 0.03  | 4.23  | 4.10  | 3.51  | 2.04  | 4.95  |
| SiH3 (Silyl)                 | 2.59 | -3.29 | -2.95 | -3.05 | -1.81 | 2.73  | 2.41  | 1.78  | -0.51 | -0.60 |
| SiH4 (Silane)                | 3.96 | -0.07 | -0.07 | -0.06 | 0.82  | 4.00  | 3.96  | 3.63  | 2.17  | 4.16  |
| SiO (Silicon monoxide)       | 5.88 | -0.63 | -0.58 | -0.46 | 0.95  | 5.91  | 5.61  | 4.88  | 3.38  | 6.27  |
| SO2 (Sulfur dioxide)         | 7.27 | -0.56 | -0.51 | -0.39 | 1.45  | 7.06  | 6.63  | 5.68  | 4.65  | 9.16  |
| MAE                          |      | 6.16  | 5.98  | 6.62  | 4.56  | 0.48  | 0.59  | 1.11  | 2.44  | 1.69  |
| MSE                          |      | -6.16 | -5.98 | -6.62 | -4.56 | -0.13 | -0.41 | -1.03 | -2.44 | -0.48 |
| RMS                          |      | 6.48  | 6.28  | 10.91 | 4.80  | 0.74  | 0.96  | 1.46  | 2.86  | 5.69  |

**Table S13. Statistical errors (in eV) of CCSD and CCSD(T) methods for IP(1) (with respect to the experimental data).**

| Property | Error | CCSD | CCSD(T) |
|----------|-------|------|---------|
| IP(1)    | MSE   | 0.06 | 0.07    |
| (121)    | MAE   | 0.17 | 0.14    |
|          | RMS   | 0.25 | 0.22    |

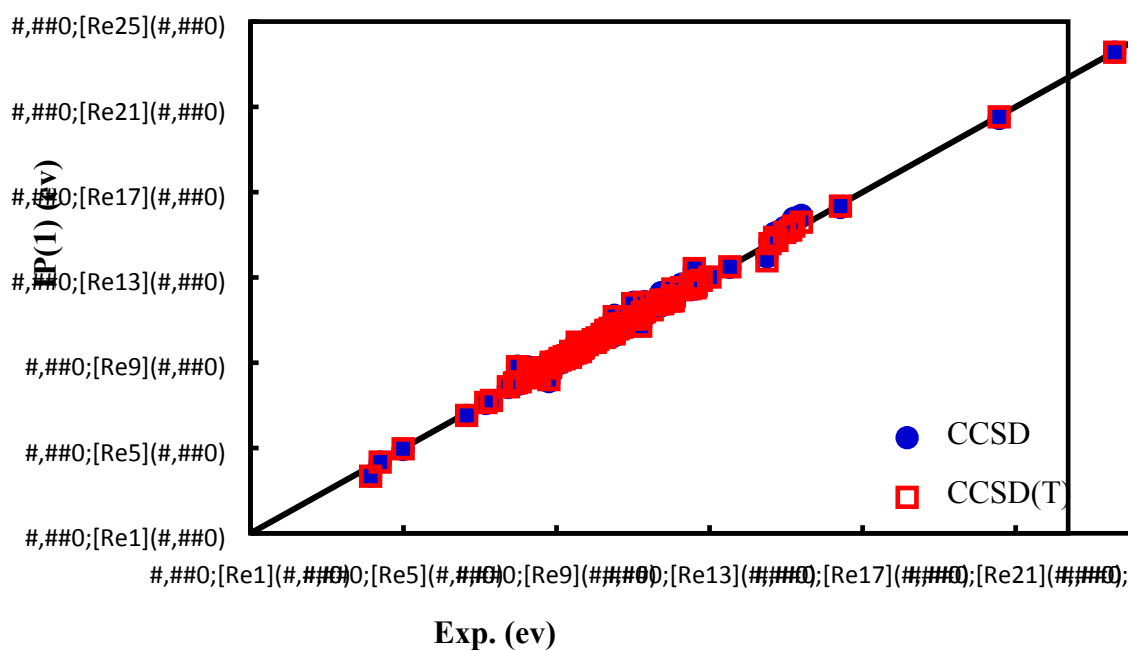

Figure 1. IP(1) calculated using CCSD and CCSD(T) methods with respect to the experimental data.

**Table S14. Statistical errors (in eV) of CCSD for IP(1), EA(1), and Eg(1) (with respect to CCSD(T)).**

| Property | Error | CCSD  |
|----------|-------|-------|
| IP(1)    | MSE   | -0.01 |
|          | MAE   | 0.10  |
|          | RMS   | 0.12  |
| EA(1)    | MSE   | -0.02 |
|          | MAE   | 0.04  |
|          | RMS   | 0.07  |
| Eg(1)    | MSE   | 0.01  |
|          | MAE   | 0.10  |
|          | RMS   | 0.13  |

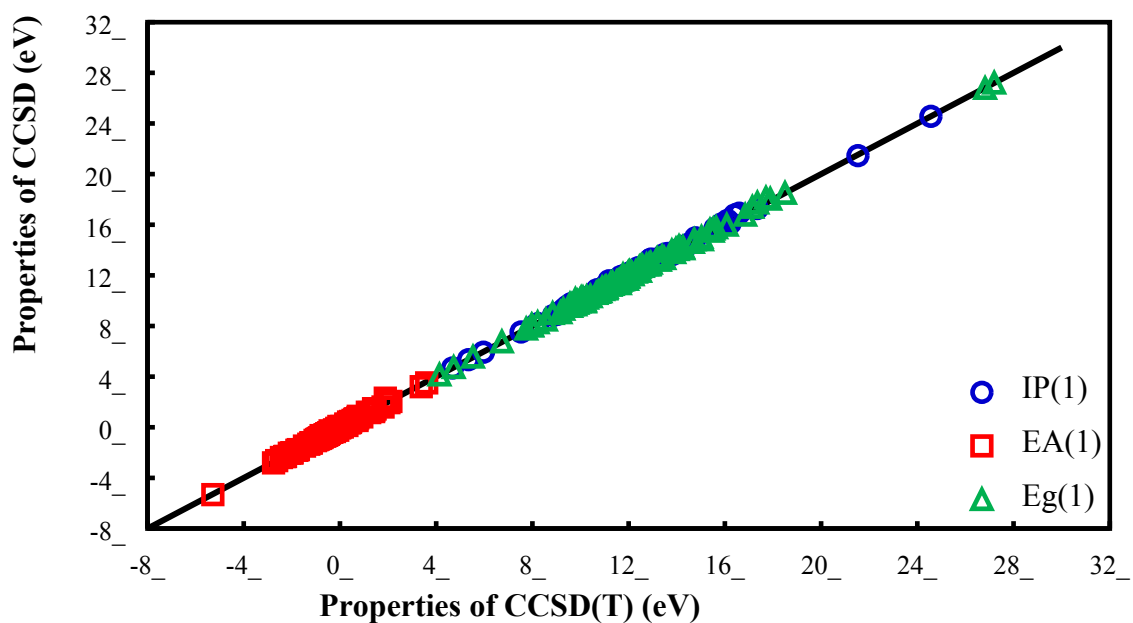**Figure 2. IP(1), EA(1), and Eg(1) calculated using CCSD with respect to those calculated using CCSD(T).****Table S15. Statistical errors (in eV) of 9 density functional methods for vertical ionization**

**potentials (with respect to the experimental data).**

| Property | Error | LDA   | PBE   | M06L  | B3LYP | $\omega$ B97        | $\omega$ B97X       | $\omega$ B97X-D    | M06-2X             | M06-HF |
|----------|-------|-------|-------|-------|-------|---------------------|---------------------|--------------------|--------------------|--------|
| IP(1)    | MSE   | 0.45  | -0.25 | -0.30 | -0.03 | <b><u>-0.01</u></b> | <b><u>-0.01</u></b> | -0.03              | 0.09               | 0.41   |
|          | MAE   | 0.56  | 0.35  | 0.36  | 0.23  | 0.20                | 0.19                | 0.19               | <b><u>0.18</u></b> | 0.46   |
|          | RMS   | 0.63  | 0.51  | 0.48  | 0.33  | 0.28                | 0.27                | <b><u>0.26</u></b> | 0.27               | 0.60   |
| IP(2)    | MSE   | -3.86 | -4.44 | -4.29 | -3.19 | <b><u>-0.28</u></b> | -0.53               | -1.06              | -1.51              | 0.89   |
|          | MAE   | 3.86  | 4.44  | 4.29  | 3.19  | <b><u>0.42</u></b>  | 0.55                | 1.06               | 1.51               | 0.99   |
|          | RMS   | 3.98  | 4.55  | 4.39  | 3.27  | <b><u>0.67</u></b>  | 0.80                | 1.24               | 1.59               | 1.15   |

## References

1. III, R. D. J. *NIST Computational Chemistry Comparison and Benchmark Database NIST Standard Reference Database Number 101, Release 15b, August 2011, see <http://cccbdb.nist.gov/>.*
2. Asbrink, L.; Niessen, W. V.; Bieri, G. 30.4-NM HE(II) PHOTOELECTRON-SPECTRA OF ORGANIC-MOLECULES .2. AZA-COMPOUNDS (C,H,N). *J. Electron Spectrosc. Relat. Phenom.* **1980**, *21* (1), 93-101.
3. Asbrink, L.; Svensson, A.; Vonniessen, W.; Bieri, G. 30.4-NM HE(II) PHOTO-ELECTRON SPECTRA OF ORGANIC-MOLECULES .5. HETERO-COMPOUNDS CONTAINING 1ST-ROW ELEMENTS (C,H,B,N,O,F). *J. Electron Spectrosc. Relat. Phenom.* **1981**, *24* (3), 293-314.
4. Bieri, G.; Asbrink, L. 30.4-NM HE(II) PHOTOELECTRON-SPECTRA OF ORGANIC-MOLECULES .1. HYDROCARBONS. *J. Electron Spectrosc. Relat. Phenom.* **1980**, *20* (1-2), 149-167.
5. Bieri, G.; Asbrink, L.; Vonniessen, W. 30.4-NM HE(II) PHOTOELECTRON-SPECTRA OF ORGANIC-MOLECULES .4. FLUORO-COMPOUNDS (C,H,F). *J. Electron Spectrosc. Relat. Phenom.* **1981**, *23* (2-3), 281-322.
6. Brundle, C. R.; Basch, H.; Robin, M. B.; Keubler, N. A. PERFLUORO EFFECT IN PHOTOELECTRON SPECTROSCOPY .1. NON-AROMATIC MOLECULES. *J. Am. Chem. Soc.* **1972**, *94* (5), 1451-&.
7. Colbourn, E. A.; Dyke, J. M.; Lee, E. P. F.; Morris, A.; Trickle, I. R. VACUUM UV PHOTOELECTRON-SPECTRUM OF SIO(X1 SIGMA+) MOLECULE. *Mol. Phys.* **1978**, *35* (3), 873-882.
8. Cvitas, T.; Gusten, H.; Klasinc, L.; Novadj, I.; Vancik, H. PHOTOELECTRON-SPECTRA OF BROMO-TRIFLUORO-METHANE AND IODO-TRIFLUORO-METHANE. *Z. Naturfors. Sect. A-J. Phys. Sci.* **1977**, *32* (12), 1528-1532.
9. Frost, D. C.; Lee, S. T.; McDowell, C. A. HIGH-RESOLUTION PHOTOELECTRON SPECTRUM OF CS. *Chem. Phys. Lett.* **1972**, *17* (2), 153-156.
10. Gelius, U.; Allan, C. J.; Allison, D. A.; Siegban, H.; Siegbahn, K. ELECTRONIC STRUCTURE OF CARBON SUBOXIDE FROM ESCA AND AB INITIO CALCULATIONS. *Chem. Phys. Lett.* **1971**, *11* (2), 224-&.
11. Gill, P. M. W.; Johnson, B. G.; Pople, J. A.; Frisch, M. J. AN INVESTIGATION OF THE PERFORMANCE OF A HYBRID OF HARTREE-FOCK AND DENSITY FUNCTIONAL THEORY. *International Journal of Quantum Chemistry* **1992**, 319-331.
12. Vonniessen, W.; Asbrink, L.; Bieri, G. 30.4 NM HE(II) PHOTO-ELECTRON SPECTRA OF ORGANIC-MOLECULES .6. HALOGENO-COMPOUNDS (C,H,CL)(C,H,BR)(C,H,I). *J. Electron Spectrosc. Relat. Phenom.* **1982**, *26* (2), 173-201.
13. Vonniessen, W.; Bieri, G.; Asbrink, L. 30.4-NM HE(II) PHOTOELECTRON-SPECTRA OF ORGANIC-MOLECULES .3. OXO-COMPOUNDS (C,H,O). *J. Electron Spectrosc. Relat. Phenom.* **1980**, *21* (2), 175-191.
